1 **A zebrafish model of COVID-19-associated cytokine storm syndrome reveals that the**  
2 **Spike protein signals via TLR2.**

3

4 Sylwia D. Tyrkalska<sup>1,2,3,\*,#</sup>, Alicia Martínez-López<sup>1,2,3,#</sup> Annamaria Pedoto<sup>1,2,3</sup>, Sergio  
5 Candel<sup>1,2,3</sup>, María L. Cayuela<sup>2,3,4,\*</sup>, Victoriano Mulero<sup>1,2,3,\*,&</sup>

6

7 <sup>1</sup>Departamento de Biología Celular e Histología, Facultad de Biología, Universidad de Murcia,  
8 30100 Murcia, Spain

9 <sup>2</sup>Instituto Murciano de Investigación Biosanitaria (IMIB)-Arrixaca, 30120 Murcia, Spain.

10 <sup>3</sup>Centro de Investigación Biomédica en Red de Enfermedades Raras (CIBERER), Instituto de  
11 Salud Carlos III, 28029 Madrid, Spain.

12 <sup>4</sup>Hospital Clínico Universitario Virgen de la Arrixaca, 30120 Murcia, Spain.

13 # Equal contribution

14 \*To whom correspondence should be sent at: [tyrkalska.sylwia@gmail.com](mailto:tyrkalska.sylwia@gmail.com) (SDT),  
15 [marialcayuela@carm.es](mailto:marialcayuela@carm.es) (MLC), [vmulero@um.es](mailto:vmulero@um.es) (VM).

16 &Lead contact

17

18 **Running title:** The Spike protein of SARS-CoV-2 signals via Tlr2 in zebrafish.

19

20

21

22 **Abstract**

23           Understanding the mechanism of virulence of SARS-CoV-2 and host innate immune  
24 responses are essential to develop novel therapies. One of the most studied defense mechanisms  
25 against invading pathogens, including viruses, are Toll-like receptors (TLRs). Among them,  
26 TLR3, TLR7, TLR8 and TLR9 detect different forms of viral nucleic acids in endosomal  
27 compartments, whereas TLR2 and TLR4 recognize viral structural and nonstructural proteins  
28 outside the cell. Although many different TLRs have been shown to be involved in SARS-  
29 CoV-2 infection and detection of different structural proteins, most studies have been  
30 performed *in vitro* and the results obtained are rather contradictory. In this study, we report  
31 using the unique advantages of the zebrafish model for *in vivo* imaging and gene editing that  
32 the S1 domain of the Spike protein from the Wuhan strain (S1WT) induced hyperinflammation  
33 in zebrafish larvae via a Tlr2/Myd88 signaling pathway and independently of interleukin-1 $\beta$   
34 production. In addition, S1WT also triggered emergency myelopoiesis, but in this case through  
35 a Tlr2/Myd88-independent signaling pathway. These results shed light on the mechanisms  
36 involved in the COVID-19-associated cytokine storm syndrome.

37

38 **Keywords:** COVID-19; cytokine storm syndrome; spike protein; inflammation;  
39 hematopoiesis; TLRs; interleukin-1.

40

41

42

## 43 INTRODUCTION

44 Since the onset of the COVID-19 pandemic that began in late 2019, research on severe  
45 acute respiratory syndrome coronavirus 2 (SARS-CoV-2) and its disease has been conducted  
46 extensively in many different directions. Viral infections are very complex processes and  
47 require research at different interdisciplinary levels to obtain information on basic pathways  
48 leading to detailed explanations of the pathogenicity of the virus, host immune response and  
49 treatment development. Toll-like receptors (TLRs) are evolutionarily conserved pattern  
50 recognition receptors (PRRs) that discriminate between self and non-self by detecting  
51 pathogen-associated molecular patterns (PAMPs) and initiate the immune response activating  
52 signaling cascades that lead to the production of antimicrobial and proinflammatory molecules  
53 [1,2]. All TLRs belong to type I transmembrane proteins, composed of an amino-terminal  
54 leucine-rich repeat-containing ectodomain (responsible for PAMP recognition), a  
55 transmembrane domain and cytoplasmic carboxy-terminal Toll-interleukin-1 receptor (IL-1R)  
56 homology (TIR) domain (responsible for activation of downstream signal transduction) [3],  
57 which is also present in the interleukin-1 receptor (IL-1R). TLRs signals via the myeloid  
58 differentiation primary response 88 (MYD88) or TIR-domain containing adaptor inducing  
59 interferon- $\beta$  (TRIF) [4,5]. Importantly, MYD88-dependent pathway can be activated by all  
60 TLRs except TLR3, which only signals through TRIF, while TLR4 activates both pathways  
61 [6,7].

62 To date there are many well characterized TLRs that have been linked to antiviral  
63 immunity. Among them, TLR3, TLR7, TLR8 and TLR9 detect different forms of viral nucleic  
64 acids in endosomal compartments, while TLR2 and TLR4 are able to recognize viral structural  
65 and nonstructural proteins outside the cell [8,9]. TLR2 is located on the plasma membranes of  
66 immune, endothelial, and epithelial cells [10] to recognize mainly components of microbial  
67 cell walls and membranes, such as lipoproteins and peptidoglycans. As a heterodimeric  
68 receptor, it is paired with TLR1 or TLR6 to recognize different bacterial products such as  
69 triacylated lipopeptides (TLR1/TLR2) and diacylated lipopeptides (TLR1/TLR6). In case of  
70 viruses, it is assumed that TLR2 is able to recognize enveloped viral particles [11].

71 It has been shown that many different TLRs may be involved in the SARS-CoV-2  
72 infection. Both extracellular and intracellular TLR family receptors have been shown to play a  
73 role in SARS-CoV-2 viral detection. TLR2 recognizes the SARS-CoV-2 envelope protein,  
74 resulting in MYD88-dependent inflammation [12]. TLR3 is presumed to be critical in the

75 recognition of double stranded RNA (dsRNA) from SARS-CoV-2, which is generated during  
76 viral replication, and stimulates endosomal TLR3 in addition to other intracellular receptors  
77 [13]. TLR4 signaling by MYD88 and TRIF dependent pathways is proposed to detect viral  
78 structural proteins and glycolipids [14,15]. Finally, TLR7 has been linked to COVID-19  
79 severity in multiple studies, strongly suggesting a key role for TLR7 in COVID-19  
80 pathogenesis [13].

81 Although TLRs are highly conserved during evolution, in fish they show different  
82 characteristics than those present in mammals [16]. In zebrafish, high expression of TLRs was  
83 detected in the skin, which may suggest their important role in the defense against pathogens.  
84 It is also worth mentioning that zebrafish has an almost complete set of 20 putative TLR  
85 variants, of which 10 have direct human orthologs, including TLR2 [17,18]. TLR22 belongs to  
86 a fish-specific subfamily and recognizes double stranded RNA [19], whereas TLR21 is present  
87 in birds, amphibians and fish with similar expression profiles and activity to TLR9 [20].  
88 Moreover, zebrafish show duplication of some mammalian TLRs including Tlr4ba/Tlr4bb for  
89 TLR4 and Tlr5a/Tlr5b for TLR5, and Tlr8a/Tlr8b for TLR8 [21]. Interestingly, homologs of  
90 mammalian TLR6 and TLR10 are absent in fish, while other TLRs, such as Tlr14 and Tlr18,  
91 have also been identified. In addition, ligands of some zebrafish Tlr receptors have already  
92 been identified, such as lipoproteins, lipopeptides or Pam3CSK4 that can be recognized by the  
93 heterodimers of Tlr2 and flagellin by Tlr5 [22]. Furthermore, the TLR/IL-1R downstream  
94 signaling pathway is also highly conserved in zebrafish including the ortholog of Myd88  
95 among others [23].

96 In this study, we show using the zebrafish model that the hyperinflammation induced  
97 by the Spike protein of SARS-CoV-2 is mediated via a Tlr2/Myd88 signaling pathway and  
98 independently of Il1b production. In addition, Spike protein-induced emergency myelopoiesis  
99 is independent of Tlr2/Myd88 in this model.

100

## 101 **RESULTS**

### 102 *Myd88 is required for hyperinflammation but dispensable for emergency myelopoiesis* 103 *induced by S1WT*

104 As the specific TLRs activated by the spike protein of SARS-CoV-2 are controversial,  
105 either recombinant S1 from the Wuhan strain (S1WT) or flagellin (positive control that

106 activates Tlr5) were injected into the hindbrain of Myd88-deficient zebrafish and the  
107 recruitment to the injection site and the total number of neutrophils and macrophages in the  
108 head and the whole body were analyzed at 6, 12 and 24 hours post-injection (hpi). Although  
109 robust recruitment of both neutrophils and macrophages was observed in wild type larvae, a  
110 significantly lower recruitment of both immune cells was observed in Myd88-deficient larvae  
111 at 6 and 12 hpi (Figures 1A and 1B). In contrast, no differences in total number of neutrophils  
112 and macrophages in the head or whole body were observed between mutant and wild type  
113 larvae at any timepoint (Figure 1A and 1B). These results suggest that S1WT-induced  
114 emergency myelopoiesis is Myd88-independent and, therefore, depends exclusively on the  
115 inflammasome [24].

116 To further analyze the impact of Myd88 in the local and systemic inflammation induced  
117 by S1WT, samples were collected at 12 hpi from heads and the rest of the body for RT-qPCR  
118 analysis. Although flagellin and S1WT induced similar gene expression patterns, Myd88  
119 deficiency impaired the induction of transcript levels of genes encoding inflammatory  
120 mediators Il1b, Cxcl8a, Nfkb1, Tnfa, Ptgs2a, Ptgs2b, Infg and Il10 by both S1WT and flagellin  
121 (Figures 1C and S1A-S1H). Curiously, mRNA levels of genes encoding the canonical  
122 inflammasome effector Caspa also appear to be Myd88 dependent, as S1WT failed to induce  
123 their expression in Myd88-deficient larvae, while transcript levels of the gene encoding the  
124 inflammasome adaptor Asc (*pycard* gene) were largely unaffected (Figures 1C, S1I and S1J).  
125 Similarly, Myd88 deficiency impaired the induction of caspase-1 activity by S1WT and  
126 flagellin locally and systemically. These results suggest that Myd88 plays a key role in the  
127 hyperinflammation induced by S1WT in zebrafish.

128

### 129 ***Il1b signaling is not involved in S1WT-induced hyperinflammation in zebrafish***

130 To learn if the hyperinflammation induced by S1WT was dependent of Tlr signaling,  
131 we knocked down Il1b, as its receptor also signals through Myd88. For this purpose, we used  
132 a specific guide RNA that provided 70% of efficiency and showed neither toxicity nor  
133 malformations in embryos (Figures S2A and S3A-S3C). The results showed that Il1b-  
134 deficiency failed to affect S1WT-induced neutrophil and macrophage recruitment, neutrophilia  
135 and monocytosis (Figures 2A and 2B). In addition, transcript levels of genes encoding major  
136 inflammatory molecules were similarly induced by S1WT in wild type and Il1b-deficient  
137 larvae, apart from those of *il1b* itself which were drastically induced and those of *ptgs2a* and

138 *ptgs2b* which were weakly decreased (Figures 2C and S4A-S4F). Curiously, *il10* and *ifng*  
139 mRNA levels were systemically higher in *Il1b*-deficient larvae than in their wild type siblings  
140 (Figures 2C, S4G and S4H), while those of genes encoding the inflammasome components  
141 Caspa and Pycard, and caspase-1 activity were rather similar in *Il1b*-deficient and wild type  
142 larvae (Figures 2C, 2E, S4I and S4J). These results taken together confirmed the impact of the  
143 genetic edition of *il1b* gene and that S1WT-induced hyperinflammation is largely *Il1b*-  
144 independent.

145

### 146 *Tlr2 mediates the S1WT-induced hyperinflammation in zebrafish*

147 Since Myd88 acts downstream of almost all TLRs apart from TLR3 [6,7], we decided  
148 to check the expression levels of the orthologs of the TLRs shown to be involved in the  
149 responses to SARS-CoV-2, namely *tlr2*, *tlr4ba*, *tlr4bb* and *tlr7*, and *tlr3* as a negative control,  
150 upon S1WT hindbrain injection. Notably, only the transcript levels of *tlr2* increased after  
151 S1WT injection (Figures S5A-E), suggesting S1WT signals via Tlr2 in zebrafish. We then  
152 knocked down Tlr2 using a specific guide RNA that resulted in approximately 70% efficiency  
153 (Figure S2B) and showed no detrimental effect in larval development (Figures S3D-S3F). We  
154 found that Tlr2 deficiency did not affect S1WT-induced neutrophilia and monocytosis at any  
155 of the times tested (Figures S3A and 3B), further confirming that S1WT-induced emergency  
156 myelopoiesis is Tlr2/Myd88 independent. However, neutrophil and macrophage recruitment at  
157 the S1WT injection site was partially impaired in Tlr2-deficient larvae at 6 and 12 hpi (Figures  
158 3A and 3B). Moreover, Tlr2-deficient larvae also showed lower *Nfkb* activity than wild type  
159 larvae not only at the site of the injection but also in the head and the whole body at all analyzed  
160 timepoints (Figure 3C).

161 The above results were then confirmed by RT-qPCR. Thus, the transcript levels of *tlr2*  
162 significantly decreased in Tlr2-deficient animals, further confirming the high efficiency of the  
163 crRNA used (Figure S5A). Furthermore, the transcript levels of *il1b*, *cxcl8a*, *nfkb1*, *tnfa*,  
164 *ptgs2a*, *ptgs2b* and *ifng* were lower locally and systemically in the S1WT injected Tlr2-  
165 deficient larvae than in their wild type siblings (Figures 3D and S6A-S6G). However, no  
166 significant differences were observed in the mRNA levels of genes encoding anti-inflammatory  
167 *Il10* and the inflammasome components Caspa and Pycard (Figures 3H-3J). Surprisingly, the  
168 induction of caspase-1 by S1WT was also attenuated in Tlr2-deficient larvae locally and  
169 systemically (Figure 3E).

## 170 DISCUSSION

171 Since the beginning of the COVID-19 pandemic, scientists are trying to find the  
172 molecular basis of SARS-CoV-2 virulence and host immune responses to find targeted  
173 treatments to moderate the severe symptoms of the disease and save people's lives. Although  
174 both TLRs and the inflammasome pathways have been found to be involved in COVID-19, a  
175 mechanistic understanding of their involvement in COVID-19 progression is still unclear  
176 [25,26]. It has been suggested that the imbalance between the generation of excessive  
177 inflammation through TLR/MyD88 pathway and IFN- $\beta$ /TRIF pathway plays a key role in  
178 COVID-19 severity [13]. Computer-based modelling has found that the S protein of SARS-  
179 CoV-2 is predicted to bind to TLR4 [15] and, more interestingly, SARS-CoV-2 S1 protein  
180 engaged TLR4 and strongly activated the inflammatory response leading to the production of  
181 pro-inflammatory mediators through nuclear factor  $\kappa$ B (NF- $\kappa$ B) and stress-activated mitogen-  
182 activated protein kinase (MAPK) signaling pathways [14,27]. Moreover, it was suggested that  
183 SARS-CoV-2 S glycoprotein binds and activates TLR4, leading to increased cell surface  
184 expression of ACE2 which, in turn, would facilitate viral entry and cause the COVID-19-  
185 associated CSS [28]. Similarly, it has been proposed that the TLR2 signaling pathway is  
186 activated following SARS-CoV-2 infection, resulting in strong production of proinflammatory  
187 cytokines, suggesting that it may contribute to the severity of COVID-19 [29]. TLR2 is known  
188 to form heterodimers with TLR1 and TLR6, which increases its ligand diversity and allows  
189 detection of different kinds of pathogens, including viruses [11]. Recently, the envelope protein  
190 (E) of SARS-CoV-2 has been found to be a ligand of human and mouse TLR2 and, surprisingly,  
191 plays a critical role in COVID-19-associated CSS in the K18-hACE2 transgenic mice model  
192 [12]. However, this study has reported that S1+S2 of SARS-Cov-2 failed to activate mouse  
193 macrophages and human PBMCs [12]. In stark contrast, another study found that TLR2  
194 recognizes the SARS-CoV-2 S protein and then dimerizes with TLR1 or TLR6 to activate the  
195 NF- $\kappa$ B pathway and promote CSS [30].

196 In the present study, we used a newly established zebrafish model of COVID-19 [24]  
197 based on the larval hindbrain injection of SARS-CoV-2 S1 protein to further understand the  
198 contribution of Tlr2 and Myd88 signaling pathway to the COVID-19-associated CSS. Genetic  
199 experiments demonstrated that Tlr2 sensed S1WT and induced hyperinflammation via Myd88  
200 in zebrafish. Furthermore, this model has revealed: (i) S1WT-induced hyperinflammation is  
201 independent of the production of Il1b and (ii) S1WT-induced emergency myelopoiesis is  
202 Tlr2/Myd88-independent. On the one hand, the relevance of IL1B in the COVID-19-associated

203 CSS is unclear, as a large controlled trial in hospitalized patients with COVID-19 found no  
204 therapeutic benefit of IL-1 blockade [31], whereas another trial of early treatment of COVID-  
205 19 patients with anakinra, to block IL-1, found decreased patient severity and improved  
206 survival [32]. On the other hand, although the relevance of emergency hematopoiesis in  
207 COVID-19 has been recognized, it has been less studied than the CSS. Thus, multi-omic single-  
208 cell immune profiling of COVID-19 patients has revealed that emergency myelopoiesis is a  
209 prominent feature of fatal COVID-19 [33]. In addition, COVID-19 patients in intensive care  
210 also show low levels of hemoglobin and circulating nucleated red cells, and erythroid  
211 progenitors can be infected by SARS-CoV-2 via ACE2 [34]. The zebrafish model is excellent  
212 for further understanding the role of altered hematopoiesis in patients with COVID-19. Thus,  
213 although our results point to the relevance of the inflammasome in S1-driven emergency  
214 myelopoiesis and dispensability of Tlr, the decreased caspase-1 activity levels in Tlr2- and  
215 Myd88-deficient larvae injected with S1 suggest a crosstalk between these 2 pivotal  
216 inflammatory pathways.

217 In summary, despite controversies, it appears that both TLR4 and TLR2 may contribute  
218 significantly to the pathogenesis of COVID-19 by promoting CSS. Therefore, TLR4 and TLR2  
219 appear to be promising therapeutic targets in COVID-19 [35-37]. The zebrafish model of  
220 COVID-19 has confirmed the critical role played by TLR signaling pathway in COVID-19-  
221 associated CSS. This model, therefore, is an excellent platform for chemical screening of anti-  
222 inflammatory Tlr2 antagonist compounds to alleviate CSS and to identify therapeutic targets  
223 and novel drugs to treat COVID-19.

224

## 225 MATERIALS AND METHODS

### 226 *Animals*

227 Zebrafish (*Danio rerio* H.) were obtained from the Zebrafish International Resource  
228 Center and mated, staged, raised and processed as described [38]. The lines *Tg(mpx:eGFP)<sup>i114</sup>*  
229 [39], *Tg(lyz:DsRED2)<sup>nz50</sup>* [40], *Tg(mfap4:mCherry-F)<sup>ump6</sup>* referred to as *Tg(mfap4:mCherry)*  
230 [41], *Tg(NFkB-RE:eGFP)<sup>sh235</sup>* referred to as *nfkb:eGFP* [42], *myd88<sup>shu3668/hu3568</sup>* mutant [43],  
231 and casper (*mitfa<sup>w2/w2</sup>; mpv17<sup>a9/a9</sup>*) [44] were previously described. The experiments performed  
232 comply with the Guidelines of the European Union Council (Directive 2010/63/EU) and the  
233 Spanish RD 53/2013. The experiments and procedures were performed approved by the  
234 Bioethical Committees of the University of Murcia (approval number #669/2020).



235 *Analysis of gene expression*

236 Total RNA was extracted from whole head/tail part of the zebrafish body with TRIzol  
237 reagent (Invitrogen) following the manufacturer's instructions and treated with DNase I,  
238 amplification grade (1 U/mg RNA: Invitrogen). SuperScript IV RNase H Reverse  
239 Transcriptase (Invitrogen) was used to synthesize first-strand cDNA with random primer from  
240 1mg of total RNA at 50 °C for 50 min. Real-time PCR was performed with an ABI PRISM  
241 7500 instrument (Applied Biosystems) using SYBR Green PCR Core Reagents (Applied  
242 Biosystems). The reaction mixtures were incubated for 10 min at 95 °C, followed by 40 cycles  
243 of 15 s at 95 °C, 1 min at 60 °C, and finally 15 s at 95 °C, 1 min 60 °C, and 15 s at 95 °C. For  
244 each mRNA, gene expression was normalized to the ribosomal protein S11 (rps11) content in  
245 each sample using the Pfaffl method [45]. The primers used are shown in Table S1. In all cases,  
246 each PCR was performed with samples in triplicate and repeated with at least two independent  
247 samples.

248

249 *CRISPR and recombinant protein injections, and chemical treatments in zebrafish*

250 crRNA for zebrafish *il1b*, *tlr2* (Table S2) or negative control (Catalog #1072544), and  
251 tracrRNA were resuspended in Nuclease-Free Duplex Buffer to 100 µM. One µl of each was  
252 mixed and incubated for 5 min at 95 °C for duplexing. After removing from the heat and  
253 cooling to room temperature, 1.43 µl of Nuclease-Free Duplex Buffer was added to the duplex,  
254 giving a final concentration of 1000 ng/µl. Finally, the injection mixture was prepared by  
255 mixing 1 µl of duplex, 2.55 µl of Nuclease-Free Duplex Buffer, 0.25 µl Cas9 Nuclease V3  
256 (IDT, 1081058) and 0.25 µl of phenol red, resulting in final concentrations of 250 ng/µl of  
257 gRNA duplex and 500 ng/µl of Cas9. The prepared mix was microinjected into the yolk sac of  
258 one- to eight-cell-stage embryos using a microinjector (Narishige) (0.5-1 nl per embryo). The  
259 same amounts of gRNA were used in all experimental groups. The efficiency of gRNA was  
260 checked by amplifying the target sequence with a specific pair of primers (Table S1) and the  
261 TIDE webtool (<https://tide.nki.nl/>) and/or SYNTHOGO Crisper Performance Analysis webtool  
262 (<https://ice.synthego.com>). Embryos injected with crIl1b or crTlr2 were sorted at 2 hpf to  
263 choose the ones in the same developmental stage and raised at similar densities. At 24 hpf, the  
264 number of dead/alive embryos was determined and within the surviving group the number of  
265 embryos with any malformation was scored. At 26 hpf, the number of otic vesicle structures

266 that could fit between the eye and otic vesicle in each larva were estimated. The higher the  
267 number of otic vesicles fitted, the lower the level of the larval development [46].

268 Recombinant His-tagged Spike S1 wild-type produced in baculovirus-insect cells and  
269 with < 1.0 EU per  $\mu\text{g}$  protein as determined by the LAL method (#40591-V08B1, Sino  
270 Biological) or flagellin (Invivogen) at a concentration of 0.25 mg/ml supplemented with phenol  
271 red were injected into the hindbrain ventricle (1 nl) of 48 hpf zebrafish larvae.

272 In some experiments, 24hpf embryos were treated with 0.3% N-Phenylthiourea (PTU)  
273 to inhibit melanogenesis.

274

#### 275 *Caspase-1 activity assays*

276 Caspase-1 activity was determined with the fluorometric substrate Z-YVAD 7-Amido-  
277 4-trifluoromethylcoumarin (Z-YVAD-AFC, caspase-1 substrate VI, Calbiochem) as described  
278 previously [47,48]. A representative graph of caspase-1 activity of three repeats is shown in  
279 the figures.

280

#### 281 *In vivo imaging*

282 To study immune cell recruitment to the injection site and Nfkb activation, 2 dpf  
283 *mpx:eGFP*, *mfap4:mcherry* or *nfkb:egfp* larvae were anaesthetized in embryonic medium with  
284 0.16 mg/ml buffered tricaine. Images of the hindbrain, head or whole-body area were taken 3,  
285 6, 12 and 24 h post-injection (hpi) using a Leica MZ16F fluorescence stereomicroscope. The  
286 number of neutrophils or macrophages was determined by visual counting and the fluorescence  
287 intensity was obtained and analyzed with ImageJ (FIJI) software [49].

288 Neutral red stains zebrafish macrophage granules and the procedure was performed as  
289 originally reported [50]. Briefly, macrophage staining was performed on live 3 dpf larvae and  
290 was obtained by incubating the embryos in 2.5 g/ml of neutral red (in embryonic medium) at  
291 25-30°C in the dark for 5-8 h. The larvae were anesthetized in 0.16 mg/ml buffered tricaine  
292 and imaged using a Leica MZ16F fluorescence stereo microscope.

293 In all experiments, images were pooled from at least 3 independent experiments  
294 performed by two people and using blinded samples.

295 *Statistical analysis*

296 Data are shown as mean  $\pm$  s.e.m. and were analyzed by analysis of variance and a Tukey  
297 multiple range test to determine differences between groups. The differences between two  
298 samples were analyzed by Student's t-test.

299

300 **CONFLICT OF INTEREST**

301 The authors declare no conflict of interest.

302

303 **ACKNOWLEDGMENTS**

304 We thank I. Fuentes and P. Martinez for their excellent technical assistance, and Profs.  
305 Tobin, Crosier, Renshaw, Zon, Meijer and Lutfalla for the zebrafish lines.

306

307 **FINANCIAL DISCLOSURE**

308 This work has been funded by Fundación Séneca, CARM, Spain (research grants  
309 20793/PI/18 to VM and 00006/COVI/20 to VM and MLC), Saavedra Fajardo (postdoctoral  
310 contract to SC), the European Union's Horizon 2020 research and innovation program under  
311 the Marie Skłodowska-Curie (grant agreement No.955576 – INFLANET), Spanish Ministry of  
312 Science and Innovation (Juan de la Cierva-Incorporación postdoctoral contract to SDT), co-  
313 funded with European Regional Development Funds and ZEBER funded by Consejería de  
314 Sanidad-CARM (postdoctoral contract to AM-L). The funders had no role in the study design,  
315 data collection and analysis, decision to publish, or preparation of the manuscript

316

317 **AUTHOR CONTRIBUTIONS**

318 SDT, VM and MLC conceived the study; SDT, AM-L, AP and SC performed the  
319 research; SDT, AM-L, AP, SC, MLC and VM analyzed the data; and SDT and VM wrote the  
320 manuscript with minor contributions from other authors.

321

322

## 323 DATA AVAILABILITY STATEMENT

324 All data needed to evaluate the conclusions in the paper are present in the paper  
325 and/or the Supplementary Materials.

326

## 327 References

- 328 1. Lester SN, Li K. Toll-like receptors in antiviral innate immunity. *J Mol Biol.* 2014 Mar  
329 20;426(6):1246-64.
- 330 2. Kawai T, Akira S. Toll-like receptors and their crosstalk with other innate receptors in  
331 infection and immunity. *Immunity.* 2011 May 27;34(5):637-50.
- 332 3. Akira S, Takeda K. Toll-like receptor signalling. *Nat Rev Immunol.* 2004 Jul;4(7):499-  
333 511.
- 334 4. Akira S. TLR signaling. *Curr Top Microbiol Immunol.* 2006;311:1-16.
- 335 5. Kawai T, Akira S. The role of pattern-recognition receptors in innate immunity: update  
336 on Toll-like receptors. *Nat Immunol.* 2010 May;11(5):373-84.
- 337 6. Yamamoto M, Sato S, Mori K, et al. Cutting edge: a novel Toll/IL-1 receptor domain-  
338 containing adapter that preferentially activates the IFN-beta promoter in the Toll-like  
339 receptor signaling. *J Immunol.* 2002 Dec 15;169(12):6668-72.
- 340 7. Takeda K, Kaisho T, Akira S. Toll-like receptors. *Annu Rev Immunol.* 2003;21:335-  
341 76.
- 342 8. Bieback K, Lien E, Klagge IM, et al. Hemagglutinin protein of wild-type measles virus  
343 activates toll-like receptor 2 signaling. *J Virol.* 2002 Sep;76(17):8729-36.
- 344 9. Kurt-Jones EA, Popova L, Kwinn L, et al. Pattern recognition receptors TLR4 and  
345 CD14 mediate response to respiratory syncytial virus. *Nat Immunol.* 2000  
346 Nov;1(5):398-401.
- 347 10. Shuang Chen, Wong MH, Schulte DJ, et al. Differential expression of Toll-like receptor  
348 2 (TLR2) and responses to TLR2 ligands between human and murine vascular  
349 endothelial cells. *J Endotoxin Res.* 2007;13(5):281-96.
- 350 11. Oliveira-Nascimento L, Massari P, Wetzler LM. The Role of TLR2 in Infection and  
351 Immunity. *Front Immunol.* 2012;3:79.
- 352 12. Zheng M, Karki R, Williams EP, et al. TLR2 senses the SARS-CoV-2 envelope protein  
353 to produce inflammatory cytokines. *Nat Immunol.* 2021 Jul;22(7):829-838.
- 354 13. Mabrey FL, Morrell ED, Wurfel MM. TLRs in COVID-19: How they drive  
355 immunopathology and the rationale for modulation. *Innate Immun.* 2021 10;27(7-  
356 8):503-513.
- 357 14. Zhao Y, Kuang M, Li J, et al. SARS-CoV-2 spike protein interacts with and activates  
358 TLR41. *Cell Res.* 2021 Jul;31(7):818-820.
- 359 15. Choudhury A, Mukherjee S. In silico studies on the comparative characterization of the  
360 interactions of SARS-CoV-2 spike glycoprotein with ACE-2 receptor homologs and  
361 human TLRs. *J Med Virol.* 2020 10;92(10):2105-2113.
- 362 16. Zhang J, Kong X, Zhou C, et al. Toll-like receptor recognition of bacteria in fish: ligand  
363 specificity and signal pathways. *Fish Shellfish Immunol.* 2014 Dec;41(2):380-8.
- 364 17. Jault C, Pichon L, Chluba J. Toll-like receptor gene family and TIR-domain adapters  
365 in *Danio rerio*. *Mol Immunol.* 2004 Jan;40(11):759-71.
- 366 18. Meijer AH, Gabby Krens SF, Medina Rodriguez IA, et al. Expression analysis of the  
367 Toll-like receptor and TIR domain adaptor families of zebrafish. *Mol Immunol.* 2004  
368 Jan;40(11):773-83.

- 369 19. Matsuo A, Oshiumi H, Tsujita T, et al. Teleost TLR22 recognizes RNA duplex to  
370 induce IFN and protect cells from birnaviruses. *J Immunol*. 2008 Sep 1;181(5):3474-  
371 85.
- 372 20. Yeh DW, Liu YL, Lo YC, et al. Toll-like receptor 9 and 21 have different ligand  
373 recognition profiles and cooperatively mediate activity of CpG-oligodeoxynucleotides  
374 in zebrafish. *Proc Natl Acad Sci U S A*. 2013 Dec 17;110(51):20711-6.
- 375 21. Li Y, Cao X, Jin X, et al. Pattern recognition receptors in zebrafish provide functional  
376 and evolutionary insight into innate immune signaling pathways. *Cell Mol Immunol*.  
377 2017 01;14(1):80-89.
- 378 22. Yang S, Marin-Juez R, Meijer AH, et al. Common and specific downstream signaling  
379 targets controlled by Tlr2 and Tlr5 innate immune signaling in zebrafish. *BMC*  
380 *Genomics*. 2015 Jul 25;16:547.
- 381 23. Stein C, Caccamo M, Laird G, et al. Conservation and divergence of gene families  
382 encoding components of innate immune response systems in zebrafish. *Genome Biol*.  
383 2007;8(11):R251.
- 384 24. Tyrkalska SD, Martínez-López A, Arroyo AB, et al. A zebrafish model of COVID-19-  
385 associated cytokine storm syndrome reveals differential proinflammatory activities of  
386 Spike proteins of SARS-CoV-2 variants of concern. *bioRxiv*. 2021:2021.12.05.471277.
- 387 25. Vora SM, Lieberman J, Wu H. Inflammasome activation at the crux of severe COVID-  
388 19. *Nat Rev Immunol*. 2021 Aug 09.
- 389 26. Khanmohammadi S, Rezaei N. Role of Toll-like receptors in the pathogenesis of  
390 COVID-19. *J Med Virol*. 2021 May;93(5):2735-2739.
- 391 27. Shirato K, Kizaki T. SARS-CoV-2 spike protein S1 subunit induces pro-inflammatory  
392 responses via toll-like receptor 4 signaling in murine and human macrophages. *Heliyon*.  
393 2021 Feb;7(2):e06187.
- 394 28. Aboudounya MM, Heads RJ. COVID-19 and Toll-Like Receptor 4 (TLR4): SARS-  
395 CoV-2 May Bind and Activate TLR4 to Increase ACE2 Expression, Facilitating Entry  
396 and Causing Hyperinflammation. *Mediators Inflamm*. 2021;2021:8874339.
- 397 29. Sariol A, Perlman S. SARS-CoV-2 takes its Toll. *Nat Immunol*. 2021 07;22(7):801-  
398 802.
- 399 30. Khan S, Shafiei MS, Longoria C, et al. SARS-CoV-2 spike protein induces  
400 inflammation via TLR2-dependent activation of the NF- $\kappa$ B pathway. *Elife*. 2021 12  
401 06;10.
- 402 31. Declercq J, Van Damme KFA, De Leeuw E, et al. Effect of anti-interleukin drugs in  
403 patients with COVID-19 and signs of cytokine release syndrome (COV-AID): a  
404 factorial, randomised, controlled trial. *Lancet Respir Med*. 2021 Dec;9(12):1427-1438.
- 405 32. Kyriazopoulou E, Poulakou G, Milionis H, et al. Early treatment of COVID-19 with  
406 anakinra guided by soluble urokinase plasminogen receptor plasma levels: a double-  
407 blind, randomized controlled phase 3 trial. *Nat Med*. 2021 Oct;27(10):1752-1760.
- 408 33. Wilk AJ, Lee MJ, Wei B, et al. Multi-omic profiling reveals widespread dysregulation  
409 of innate immunity and hematopoiesis in COVID-19. *J Exp Med*. 2021 Aug 2;218(8).
- 410 34. Huerga Encabo H, Grey W, Garcia-Albornoz M, et al. Human Erythroid Progenitors  
411 Are Directly Infected by SARS-CoV-2: Implications for Emerging Erythropoiesis in  
412 Severe COVID-19 Patients. *Stem Cell Reports*. 2021 Mar 9;16(3):428-436.
- 413 35. Voelker DR, Numata M. Phospholipid regulation of innate immunity and respiratory  
414 viral infection. *J Biol Chem*. 2019 03 22;294(12):4282-4289.
- 415 36. Durai P, Shin HJ, Achek A, et al. Toll-like receptor 2 antagonists identified through  
416 virtual screening and experimental validation. *FEBS J*. 2017 07;284(14):2264-2283.

- 417 37. Proud PC, Tsitoura D, Watson RJ, et al. Prophylactic intranasal administration of a  
418 TLR2/6 agonist reduces upper respiratory tract viral shedding in a SARS-CoV-2  
419 challenge ferret model. *EBioMedicine*. 2021 Jan;63:103153.
- 420 38. Westerfield M. *The Zebrafish Book. A Guide for the Laboratory Use of Zebrafish*  
421 *Danio\* (Brachydanio) rerio*. Eugene, OR.: University of Oregon Press.; 2000.
- 422 39. Renshaw SA, Loynes CA, Trushell DM, et al. A transgenic zebrafish model of  
423 neutrophilic inflammation. *Blood*. 2006 Dec 15;108(13):3976-8.
- 424 40. Hall C, Flores MV, Storm T, et al. The zebrafish lysozyme C promoter drives myeloid-  
425 specific expression in transgenic fish. *BMC Dev Biol*. 2007;7:42.
- 426 41. Phan QT, Sipka T, Gonzalez C, et al. Neutrophils use superoxide to control bacterial  
427 infection at a distance. *PLoS Pathog*. 2018 Jul;14(7):e1007157.
- 428 42. Kanther M, Sun X, Mühlbauer M, et al. Microbial colonization induces dynamic  
429 temporal and spatial patterns of NF- $\kappa$ B activation in the zebrafish digestive tract.  
430 *Gastroenterology*. 2011 Jul;141(1):197-207.
- 431 43. van der Vaart M, Spaink HP, Meijer AH. Pathogen recognition and activation of the  
432 innate immune response in zebrafish. *Adv Hematol*. 2012;2012:159807.
- 433 44. White RM, Sessa A, Burke C, et al. Transparent adult zebrafish as a tool for in vivo  
434 transplantation analysis. *Cell Stem Cell*. 2008 Feb 07;2(2):183-9.
- 435 45. Pfaffl MW. A new mathematical model for relative quantification in real-time RT-PCR.  
436 *Nucleic Acids Res*. 2001 May 1;29(9):e45.
- 437 46. Kimmel CB, Ballard WW, Kimmel SR, et al. Stages of embryonic development of the  
438 zebrafish. *Dev Dyn*. 1995 Jul;203(3):253-310.
- 439 47. Lopez-Castejon G, Sepulcre MP, Mulero I, et al. Molecular and functional  
440 characterization of gilthead seabream *Sparus aurata* caspase-1: the first identification  
441 of an inflammatory caspase in fish. *Mol Immunol*. 2008 Jan;45(1):49-57.
- 442 48. Angosto D, López-Castejón G, López-Muñoz A, et al. Evolution of inflammasome  
443 functions in vertebrates: Inflammasome and caspase-1 trigger fish macrophage cell  
444 death but are dispensable for the processing of IL-1 $\beta$ . *Innate Immun*. 2012  
445 Dec;18(6):815-24.
- 446 49. Schindelin J, Arganda-Carreras I, Frise E, et al. Fiji: an open-source platform for  
447 biological-image analysis. *Nat Methods*. 2012 Jun 28;9(7):676-82.
- 448 50. Herbomel P, Thisse B, Thisse C. Zebrafish early macrophages colonize cephalic  
449 mesenchyme and developing brain, retina, and epidermis through a M-CSF receptor-  
450 dependent invasive process. *Dev Biol*. 2001 Oct 15;238(2):274-88.

451

452

## 453 Figure legends

454 **Figure 1: Myd88 is required for hyperinflammation but dispensable for emergency**  
455 **myelopoiesis induced by S1WT.** Recombinant S1WT (+) or vehicle (-) were injected in the  
456 hindbrain ventricle (HBV) of 2 dpf wild type and Myd88-deficient *Tg(mpx:eGFP)* (A) or wild  
457 type (B-D) larvae. Neutrophil (A) and macrophage (neutral red positive cells) (B) recruitment  
458 and number were analyzed at 6, 12 and 24 hpi by fluorescence (A) or brightfield (B)  
459 microscopy, the transcript levels of the indicated genes (D) were analyzed at 12 hpi by RT-  
460 qPCR in larval head and tail (E), and caspase-1 activity was determined at 24 hpi using a  
461 fluorogenic substrate (F). Each dot represents one individual and the mean  $\pm$  S.E.M. for each  
462 group is also shown. P values were calculated using one-way ANOVA and Tukey multiple  
463 range test. RT-qPCR data are depicted as a heat map in D with higher expression shown in  
464 darker color. ns, not significant, \*\* $p \leq 0.01$ , \*\*\* $p \leq 0.001$ . auf, arbitrary units of fluorescence.

465

466 **Figure 2: Il1b signaling is not involved in S1WT-induced hyperinflammation in zebrafish.**  
467 One-cell stage zebrafish eggs of *Tg(lyz:dsRED2)* (A), *Tg(mfap4:mCherry)* (B), *Tg(NFkB-*  
468 *RE:eGFP)* (C) and wild type (D, E) were microinjected with control or *il1b* crRNA/Cas9  
469 complexes. At 2 dpf, recombinant S1WT (+) or vehicle (-) were injected in the hindbrain  
470 ventricle (HBV) of control and *Il1b*-deficient larvae. Neutrophil (A) and macrophage (B)  
471 recruitment and number, and *Nfkb* activation (C) were analyzed at 6, 12 and 24 hpi by  
472 fluorescence microscopy, the transcript levels of the indicated genes were analyzed at 12 hpi  
473 by RT-qPCR (D), and caspase-1 activity was determined at 24 hpi using a fluorogenic substrate  
474 (E). Each dot represents one individual and the mean  $\pm$  S.E.M. for each group is also shown.  
475 RT-qPCR data are depicted as a heat map in D with higher expression shown in darker color.  
476 P values were calculated using one-way ANOVA and Tukey multiple range test. ns, not  
477 significant, \* $p \leq 0.05$ , \*\* $p \leq 0.01$ , \*\*\* $p \leq 0.001$ . auf, arbitrary units of fluorescence.

478

479 **Figure 3: *Tlr2* mediates the S1WT-induced hyperinflammation in zebrafish.** One-cell stage  
480 zebrafish eggs of *Tg(lyz:dsRED2)* (A), *Tg(mfap4:mCherry)* (B), *Tg(NFkB-RE:eGFP)* (C) and  
481 wild type (D, E) were microinjected with control or *tlr2* crRNA/Cas9 complexes. At 2 dpf,  
482 recombinant S1WT (+) or vehicle (-) were injected in the hindbrain ventricle (HBV) of control  
483 and *Tlr2*-deficient larvae. Neutrophil (A) and macrophage (B) recruitment and number, and  
484 *Nfkb* activation (C) were analyzed at 6, 12 and 24 hpi by fluorescence microscopy, the  
485 transcript levels of the indicated genes were analyzed at 12 hpi by RT-qPCR (D), and caspase-  
486 1 activity was determined at 24 hpi using a fluorogenic substrate (E). Each dot represents one  
487 individual and the mean  $\pm$  S.E.M. for each group is also shown. RT-qPCR data are depicted as  
488 a heat map in D with higher expression shown in darker color. P values were calculated using  
489 one-way ANOVA and Tukey multiple range test. ns, not significant, \* $p \leq 0.05$ , \*\* $p \leq 0.01$ ,  
490 \*\*\* $p \leq 0.001$ . auf, arbitrary units of fluorescence.

491

492 **Figure S1 (related to Figure 1). Gene expression analysis of wild type and Myd88-**  
493 **deficient larvae injected with wild type S1.** Recombinant S1WT (+) or vehicle (-) were  
494 injected in the hindbrain ventricle of 2 dpf wild type and Myd88-deficient larvae, and the  
495 transcript levels of the indicated genes were analyzed at 12 hpi by RT-qPCR in larval head and  
496 tail. Data are shown as mean  $\pm$  S.E.M. P values were calculated using one way ANOVA and  
497 Tukey multiple range test. ns, not significant, \* $p \leq 0.05$ , \*\* $p \leq 0.01$ , \*\*\* $p \leq 0.001$ .

498 **Figure S2 (related to Figures 2 and 3).** Analysis of genome editing efficiency in larvae  
499 injected with *illb* (A) and *tlr2* (B) crRNA/Cas 9 complexes and quantification rate of  
500 nonhomologous end joining mediated repair showing all insertions and deletions (INDELS) at  
501 the target site using TIDE (<https://tide.nki.nl>).

502

503 **Figure S3 (related to Figures 2 and 3). *Il1b* and *Tlr2* deficiencies do not affect larval**  
504 **development.** The percentage of dead/alive (A, D) and malformed embryos (B, E), and the  
505 developmental stage (C, F) of *Il1b*- (A-C) and *Tlr2*-deficient (D-F) embryos was determined  
506 at 24 hpf. au, arbitrary units.

507

508 **Figure S4 (related to Figure 2). Gene expression analysis of wild type and *Il1b*-deficient**  
509 **larvae injected with wild type S1.** Recombinant S1WT (+) or vehicle (-) were injected in the  
510 hindbrain ventricle of 2 dpf wild type and *Il1b*-deficient larvae, and the transcript levels of the  
511 indicated genes were analyzed at 12 hpi by RT-qPCR in larval head and tail. Data are shown  
512 as mean  $\pm$  S.E.M. P values were calculated using one way ANOVA and Tukey multiple range  
513 test. ns, not significant, \* $\leq$ p0.05, \*\*p $\leq$ 0.01, \*\*\*p $\leq$ 0.001.

514

515 **Figure S5 (related to Figure 3). *Tlr* expression analysis of wild type and *Tlr2*-deficient**  
516 **larvae injected with wild type S1.** Recombinant S1WT (+) or vehicle (-) were injected in the  
517 hindbrain ventricle of 2 dpf wild type and *Tlr2*-deficient larvae, and the transcript levels of the  
518 indicated *tlr* genes were analyzed at 12 hpi by RT-qPCR in larval head and tail. Data are shown  
519 as mean  $\pm$  S.E.M. P values were calculated using one way ANOVA and Tukey multiple range  
520 test. ns, not significant, \*\*p $\leq$ 0.01, \*\*\*p $\leq$ 0.001.

521

522 **Figure S6 (related to Figure 3). Gene expression analysis of wild type and *Tlr2*-deficient**  
523 **larvae injected with wild type S1.** Recombinant S1WT (+) or vehicle (-) were injected in the  
524 hindbrain ventricle of 2 dpf wild type and *Tlr2*-deficient larvae, and the transcript levels of the  
525 indicated genes were analyzed at 12 hpi by RT-qPCR in larval head and tail. Data are shown  
526 as mean  $\pm$  S.E.M. P values were calculated using one way ANOVA and Tukey multiple range  
527 test. ns, not significant, \* $\leq$ p0.05, \*\*p $\leq$ 0.01, \*\*\*p $\leq$ 0.001.

528

529



# Figure 1

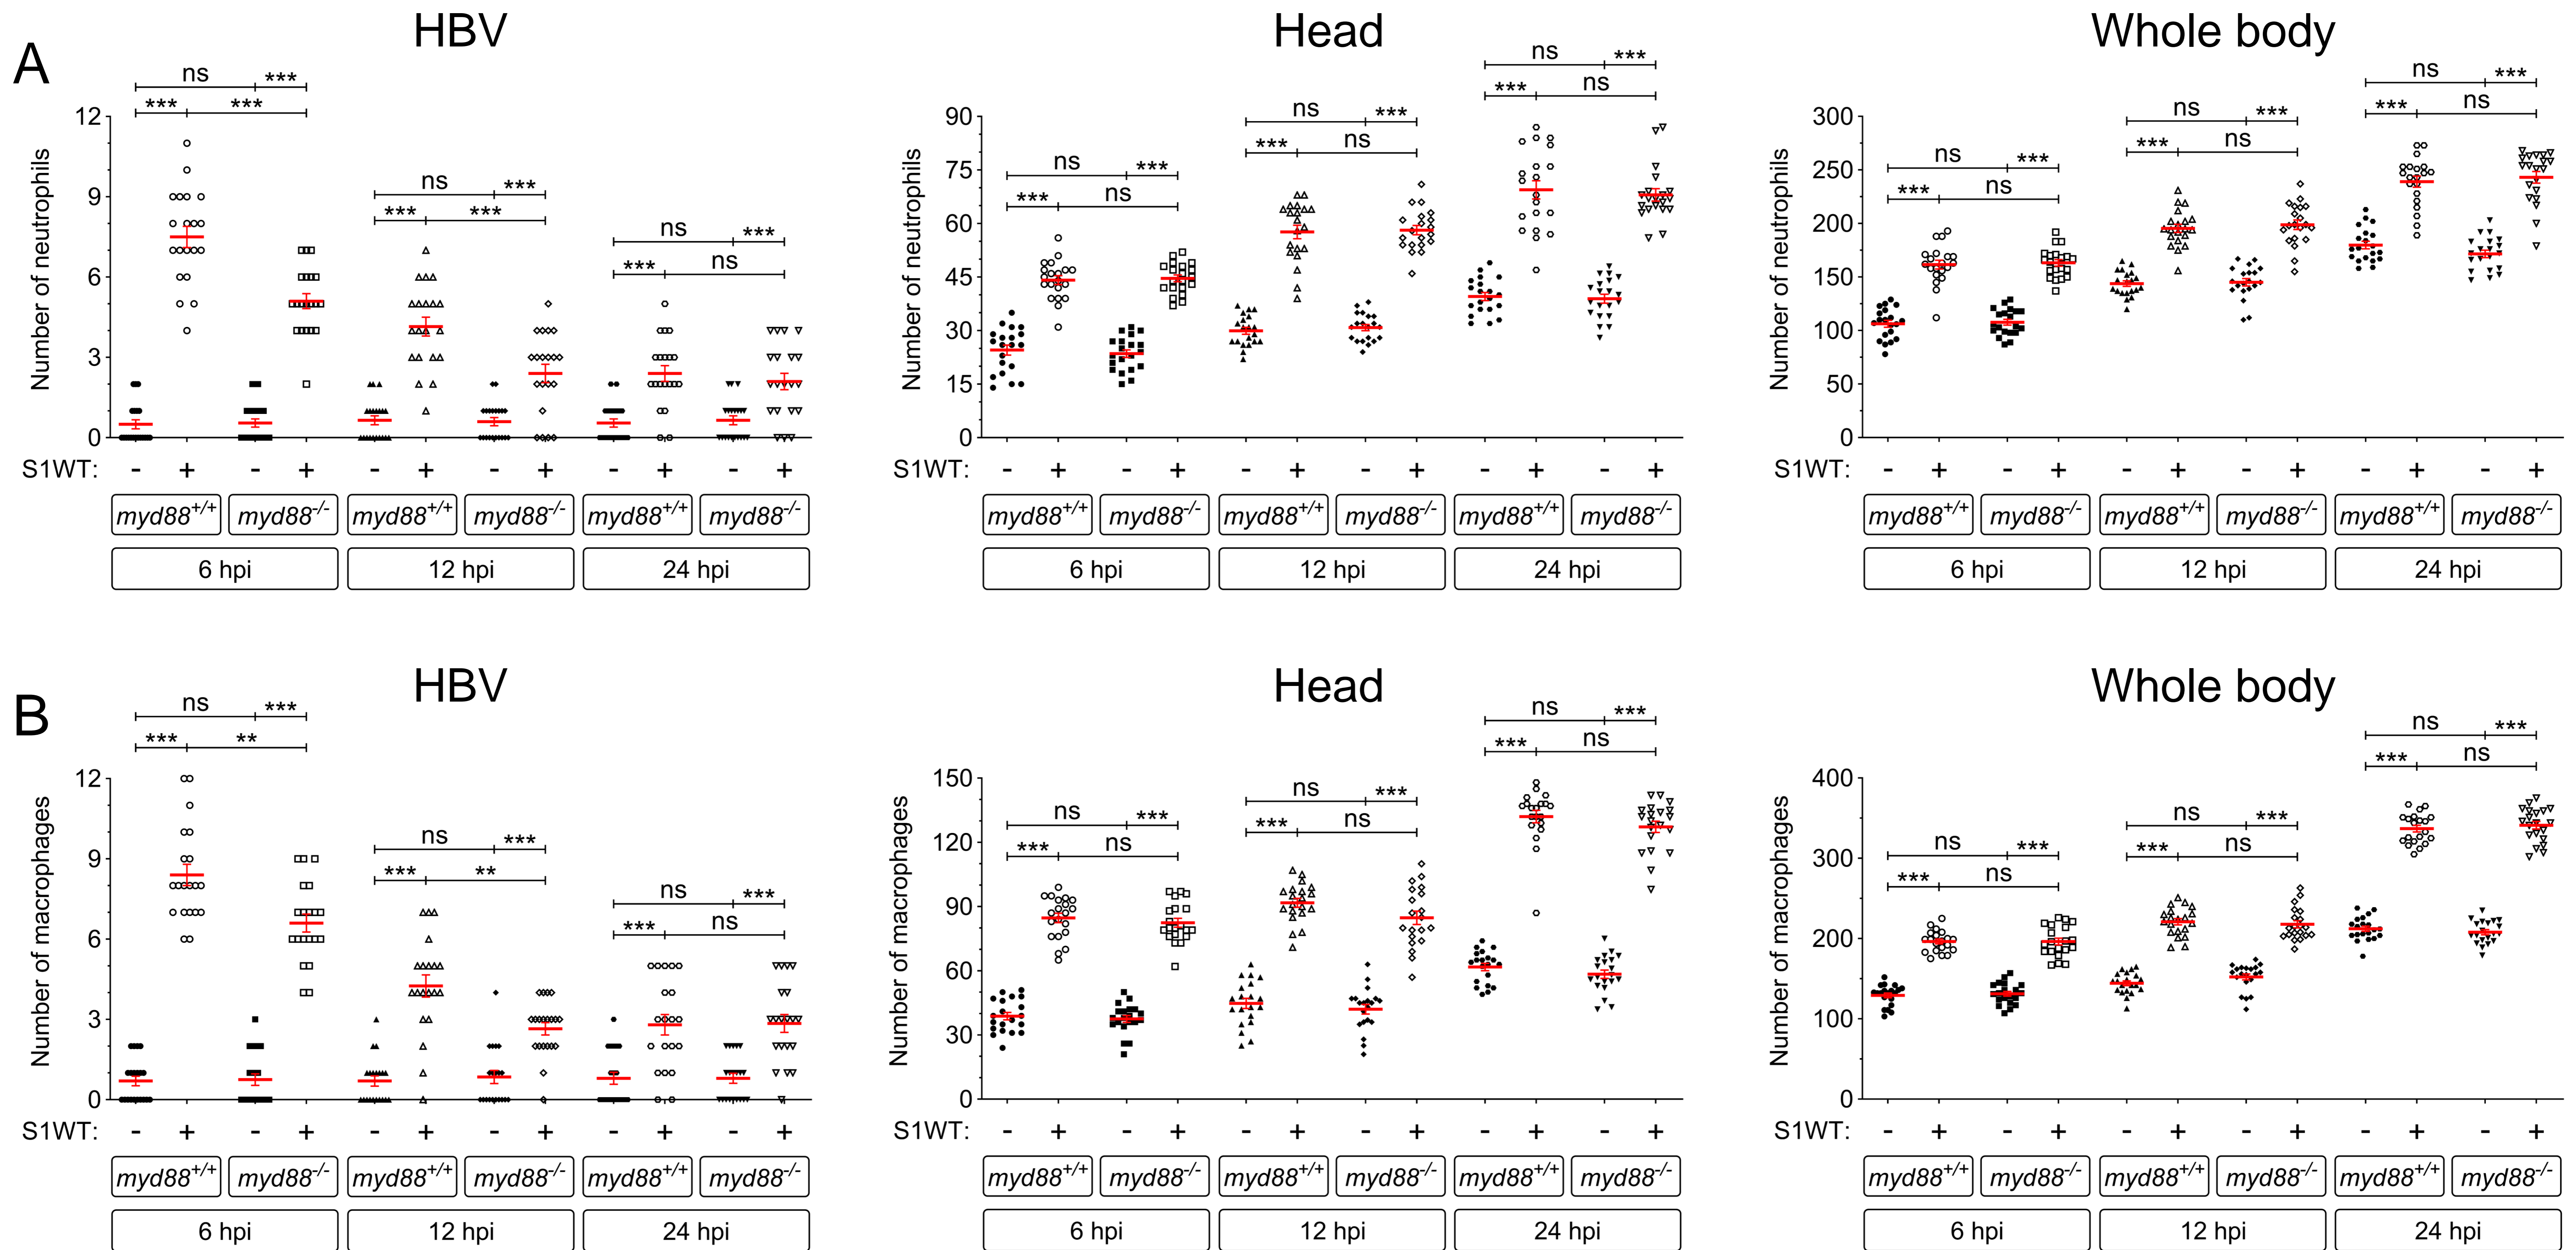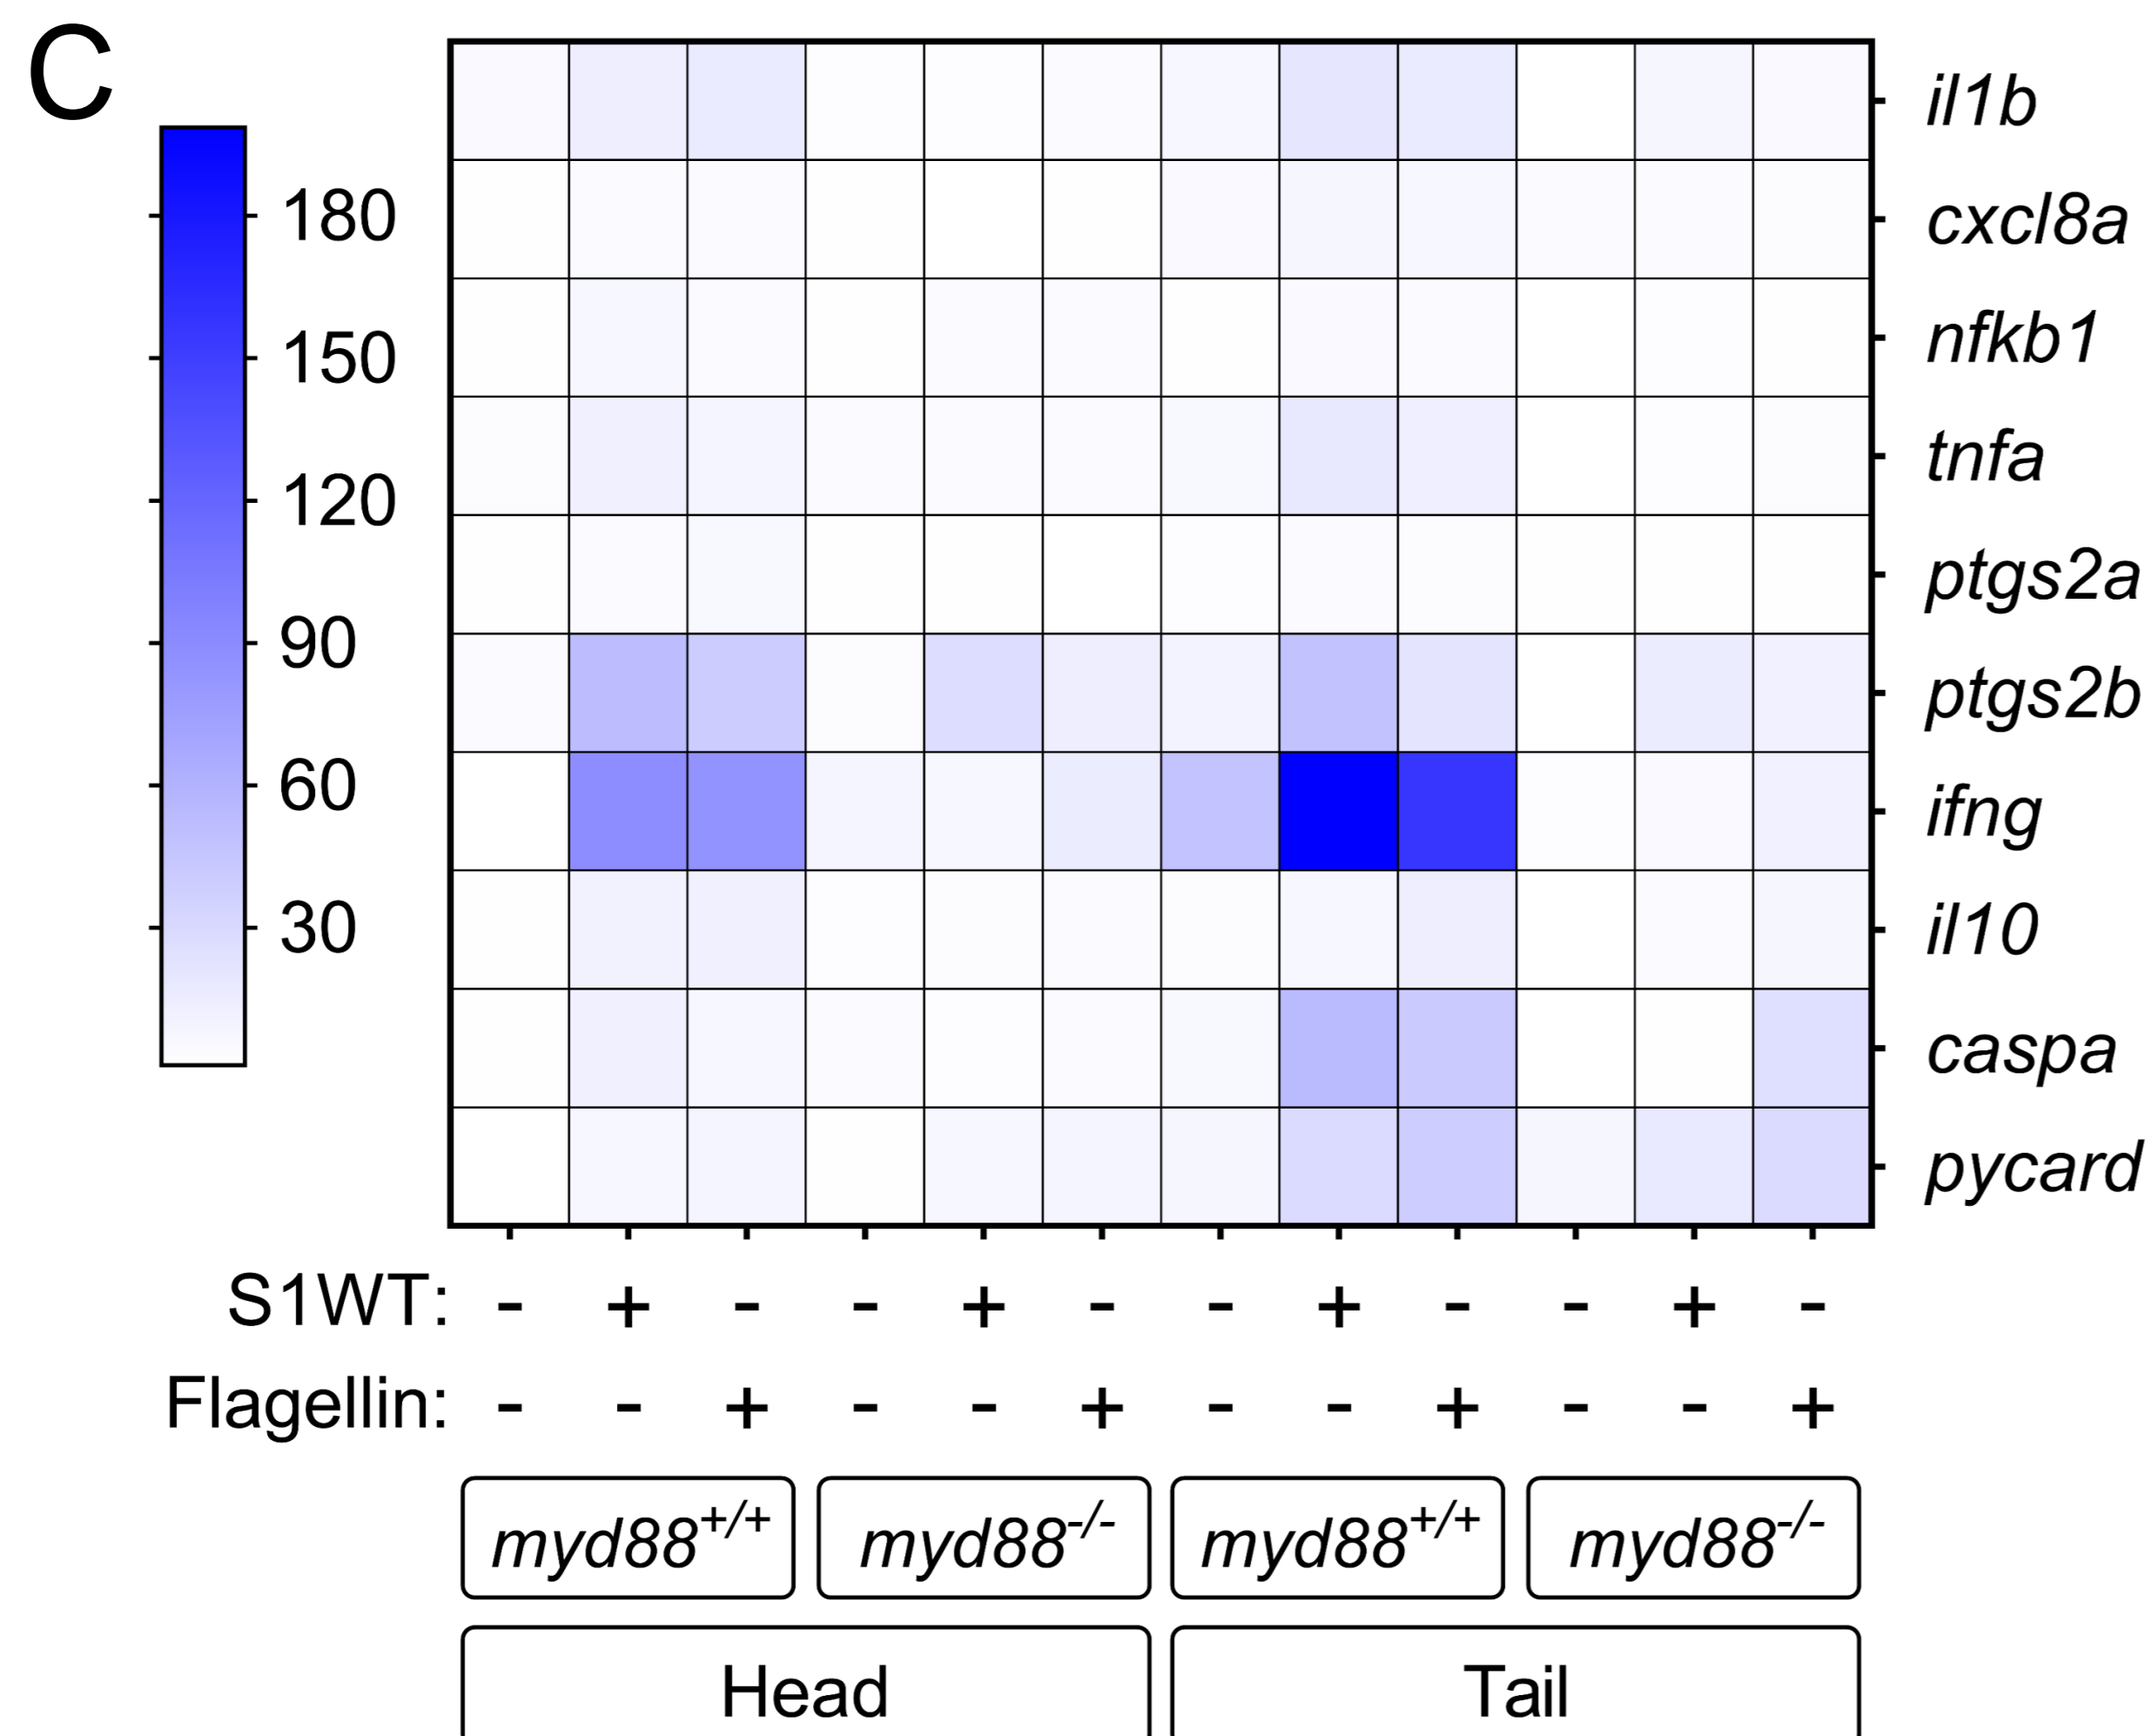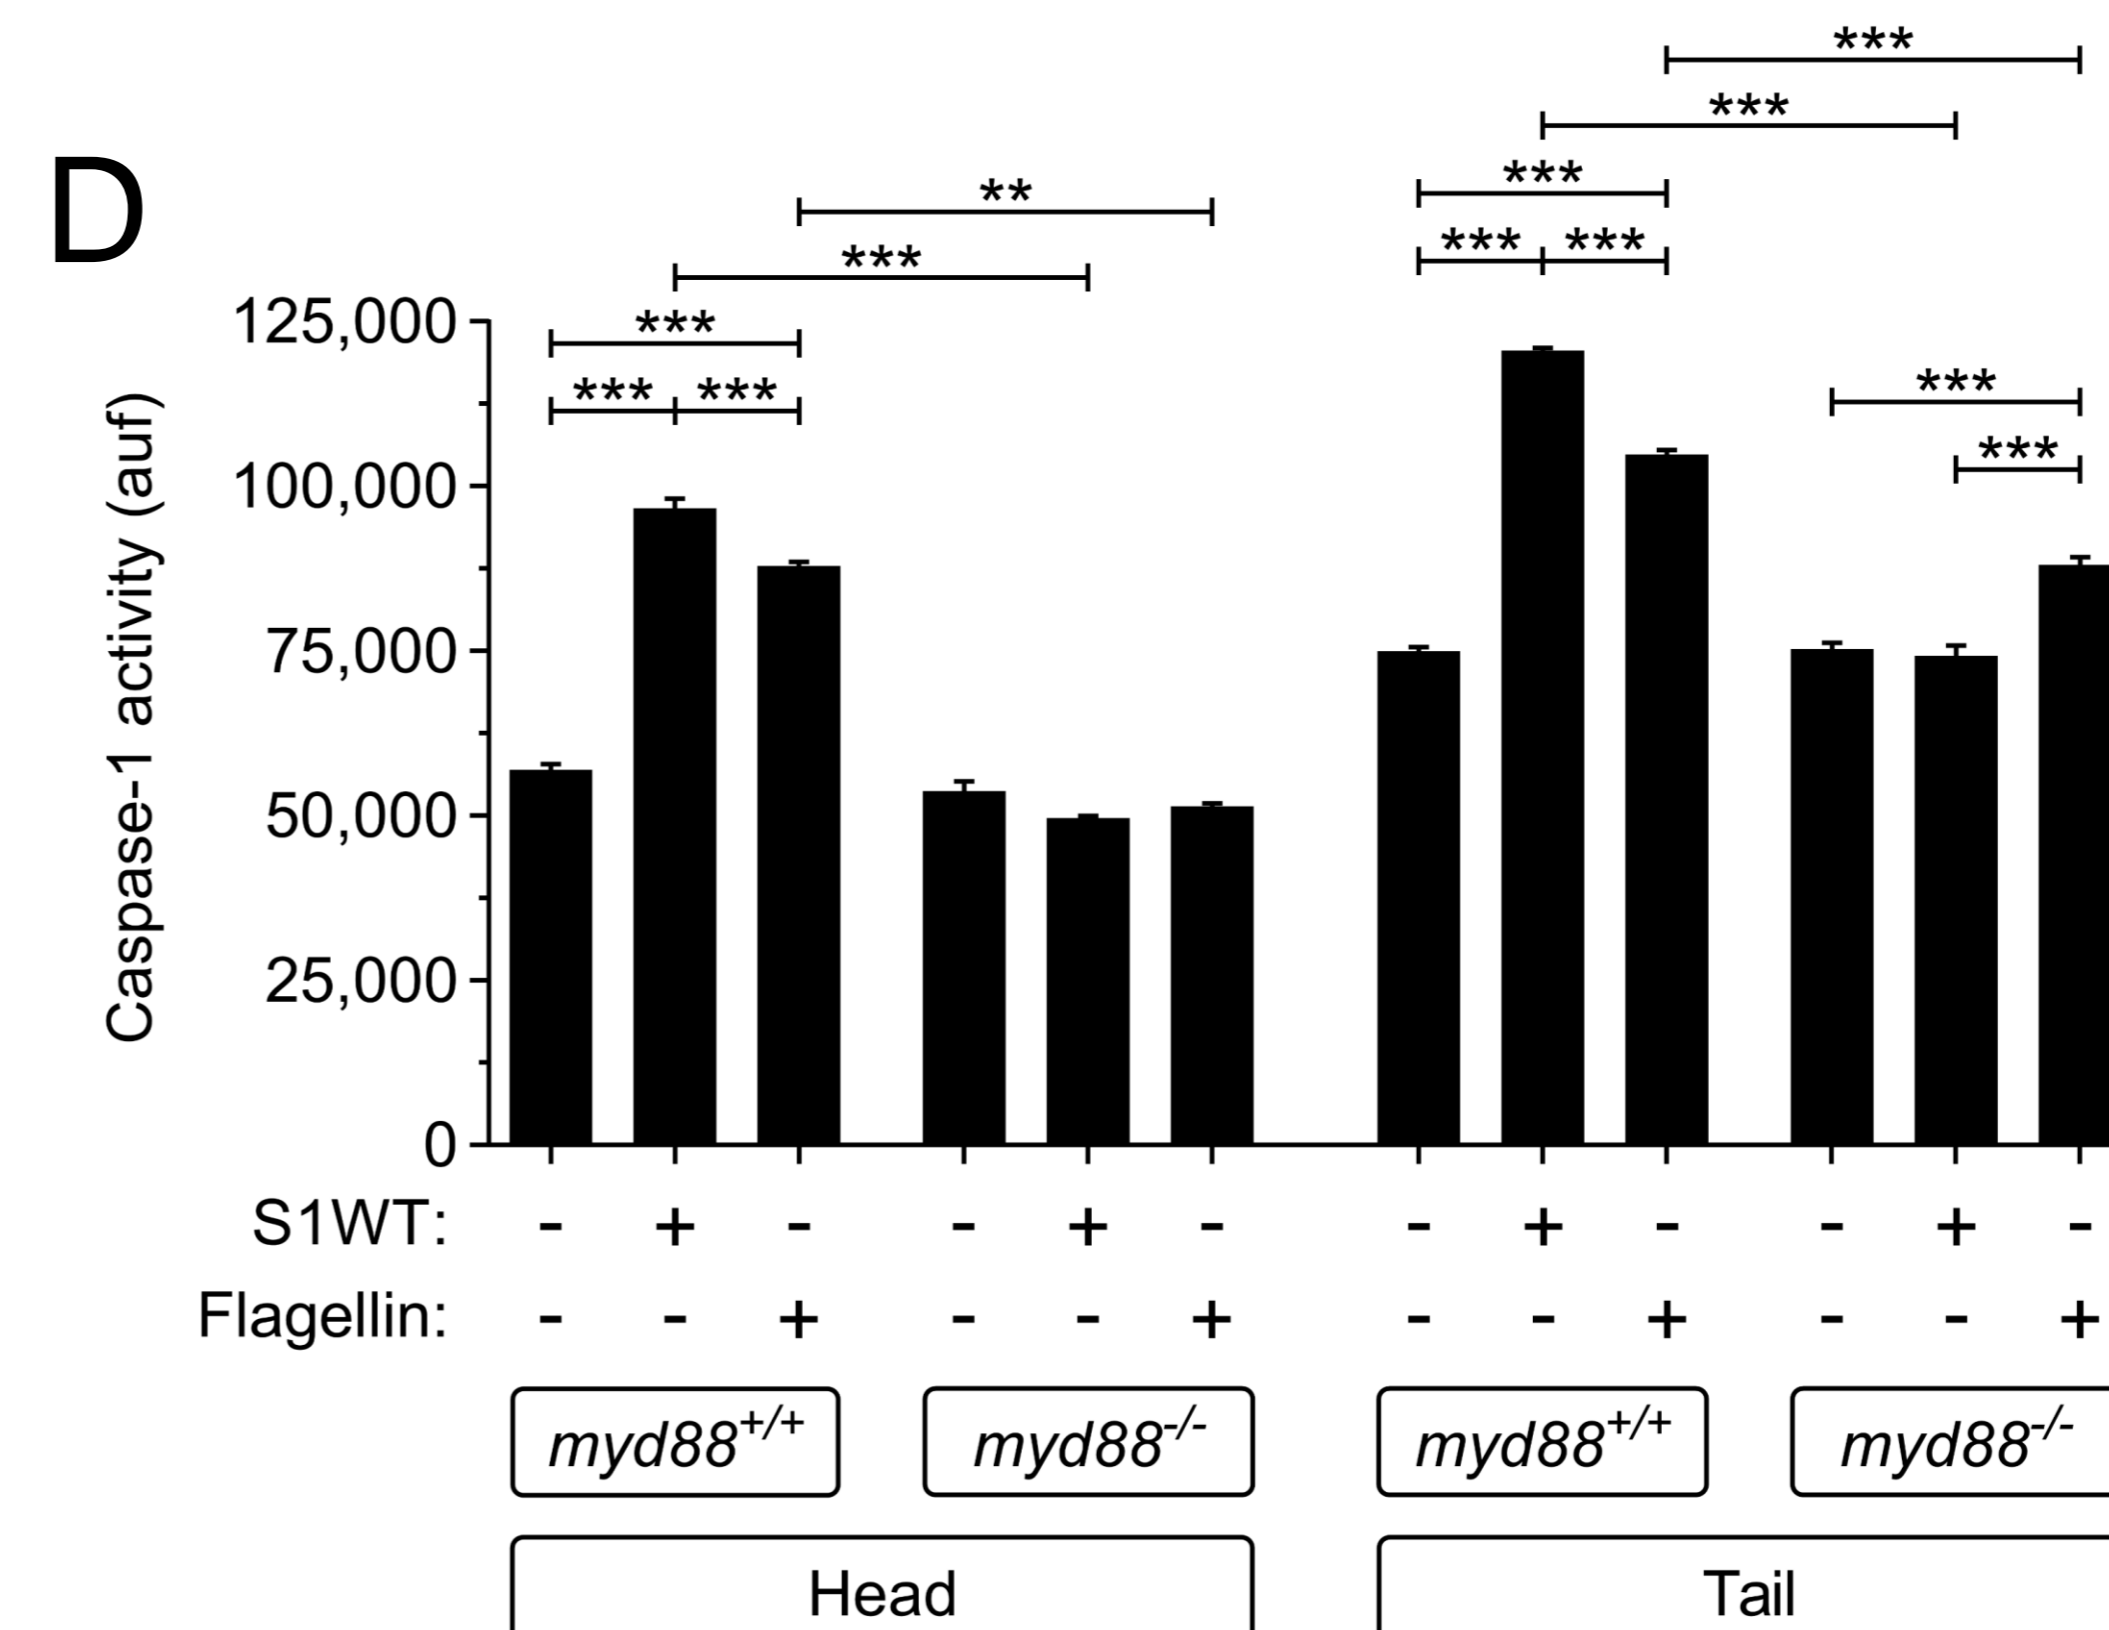

# Figure 2

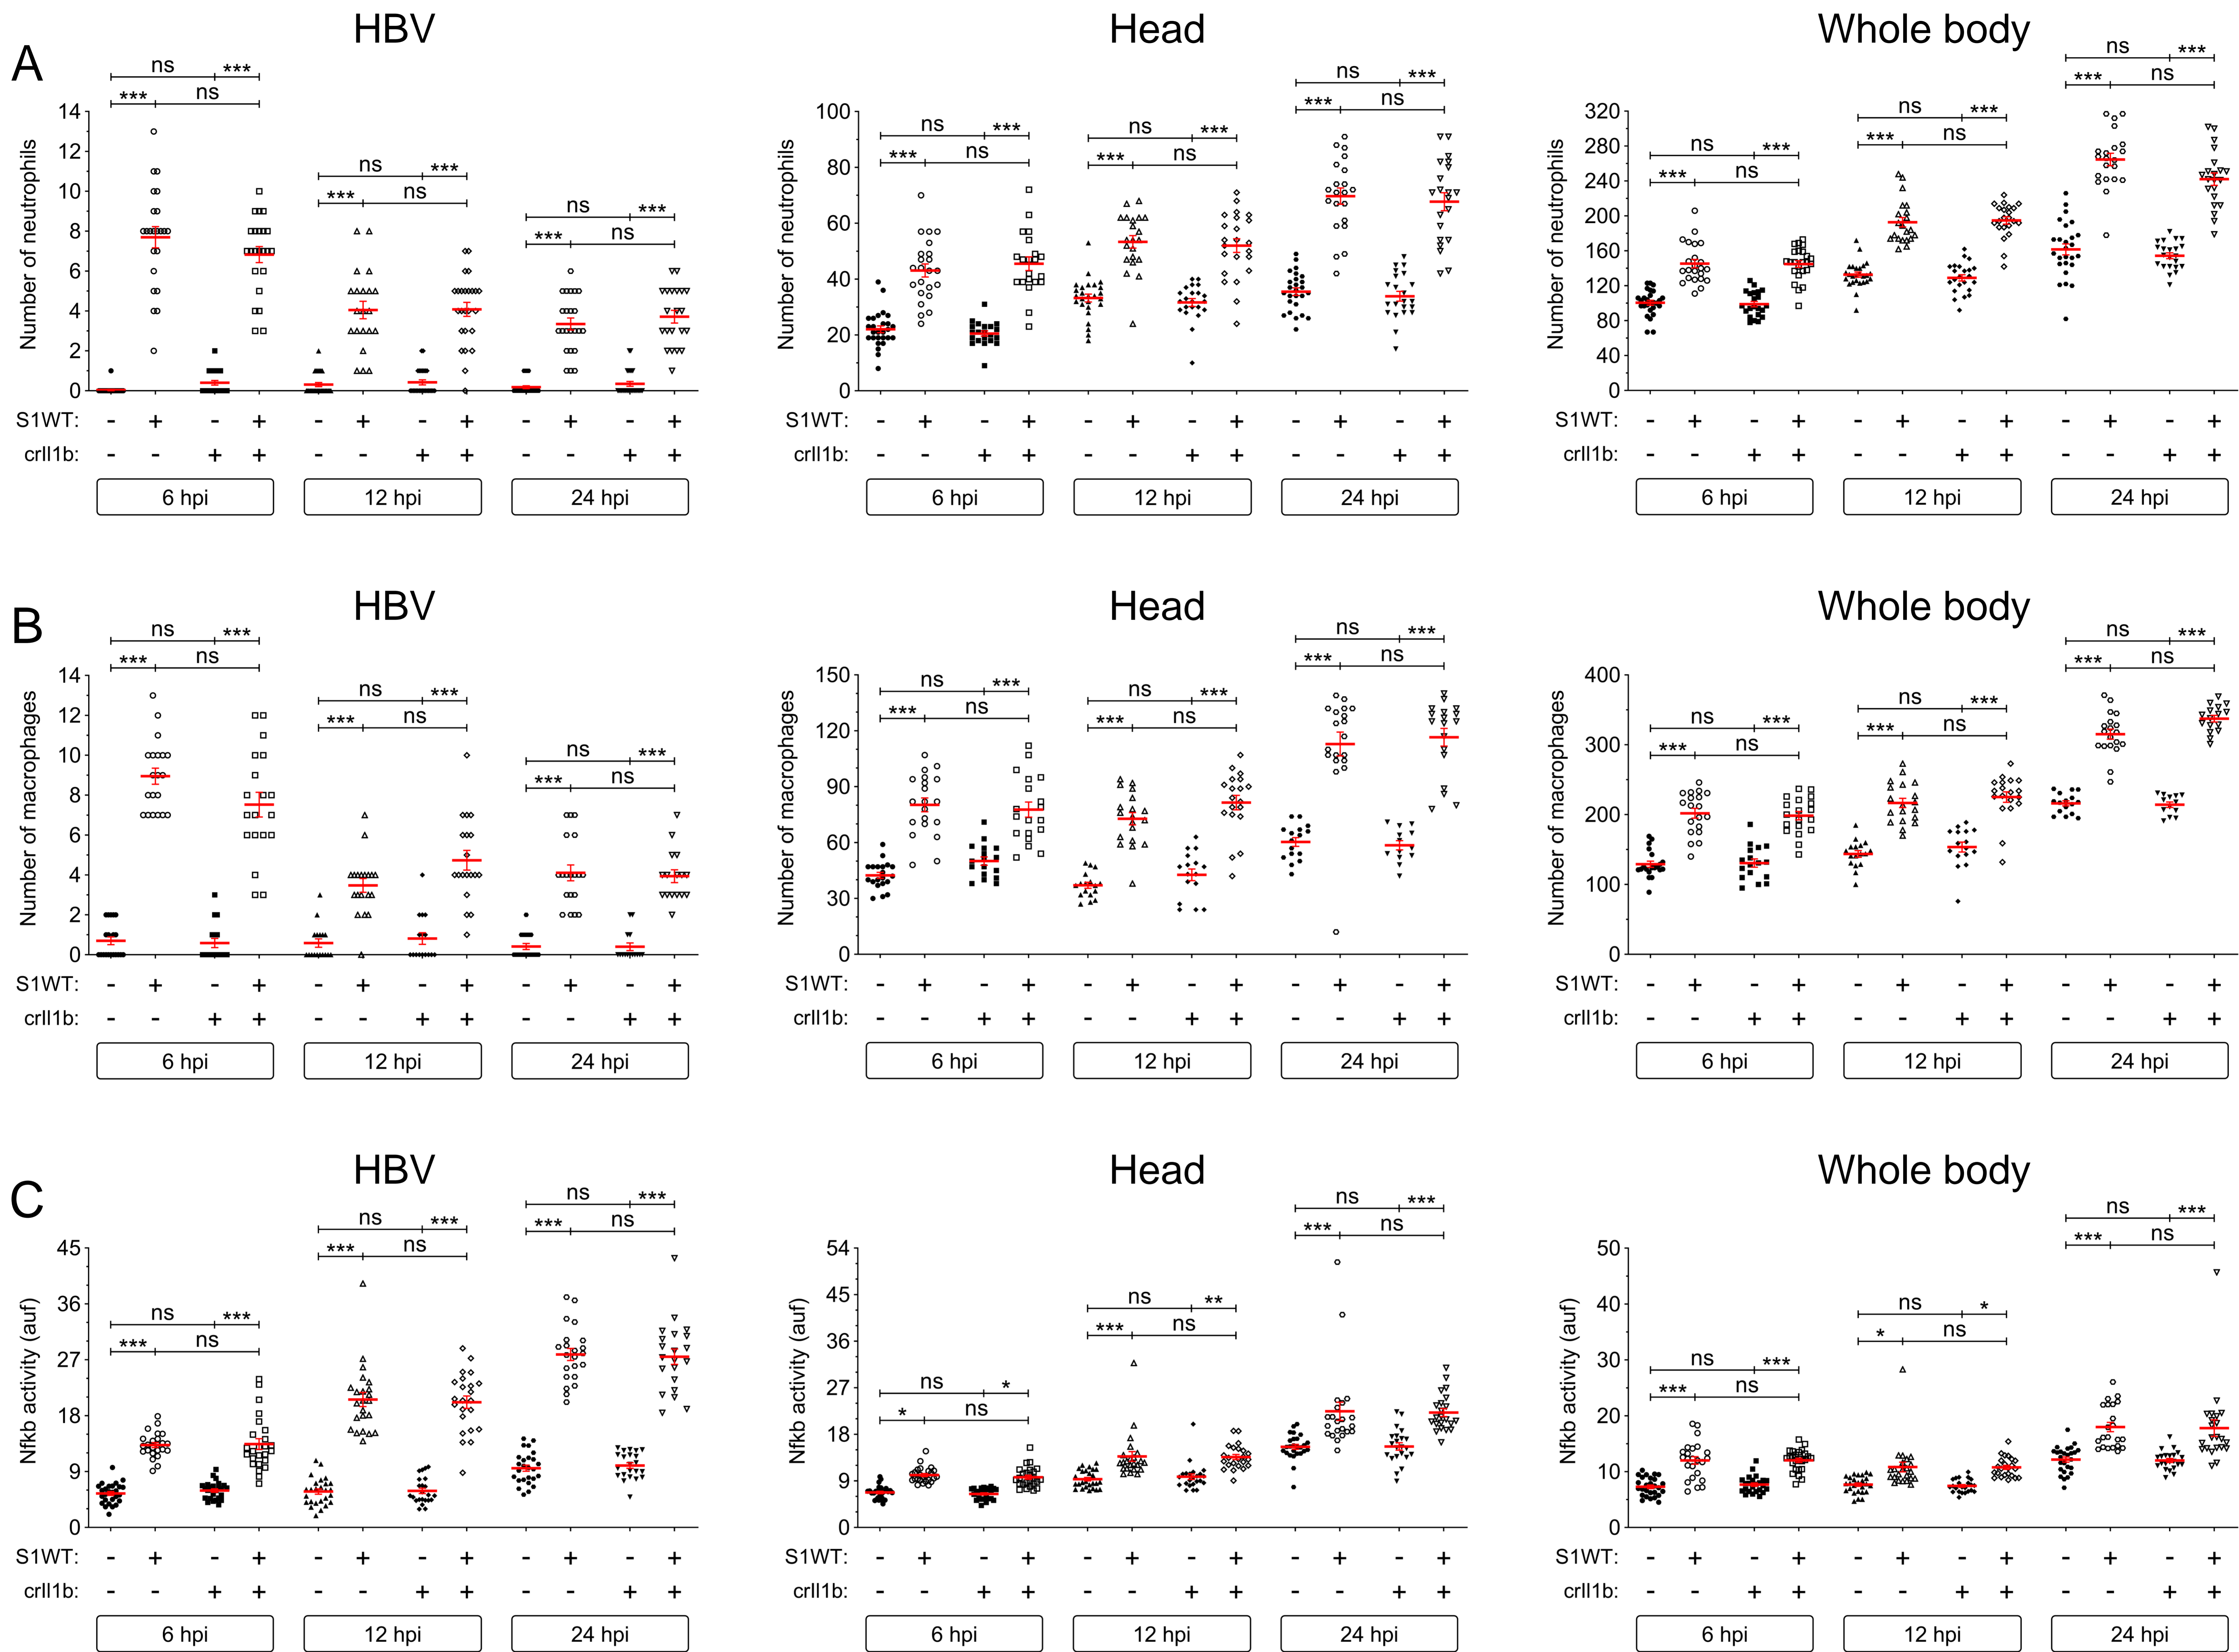

bioRxiv preprint doi: <https://doi.org/10.1101/2022.07.14.500031>; this version posted July 15, 2022. The copyright holder for this preprint (which was not certified by peer review) is the author/funder, who has granted bioRxiv a license to display the preprint in perpetuity. It is made available under aCC-BY-NC-ND 4.0 International license.

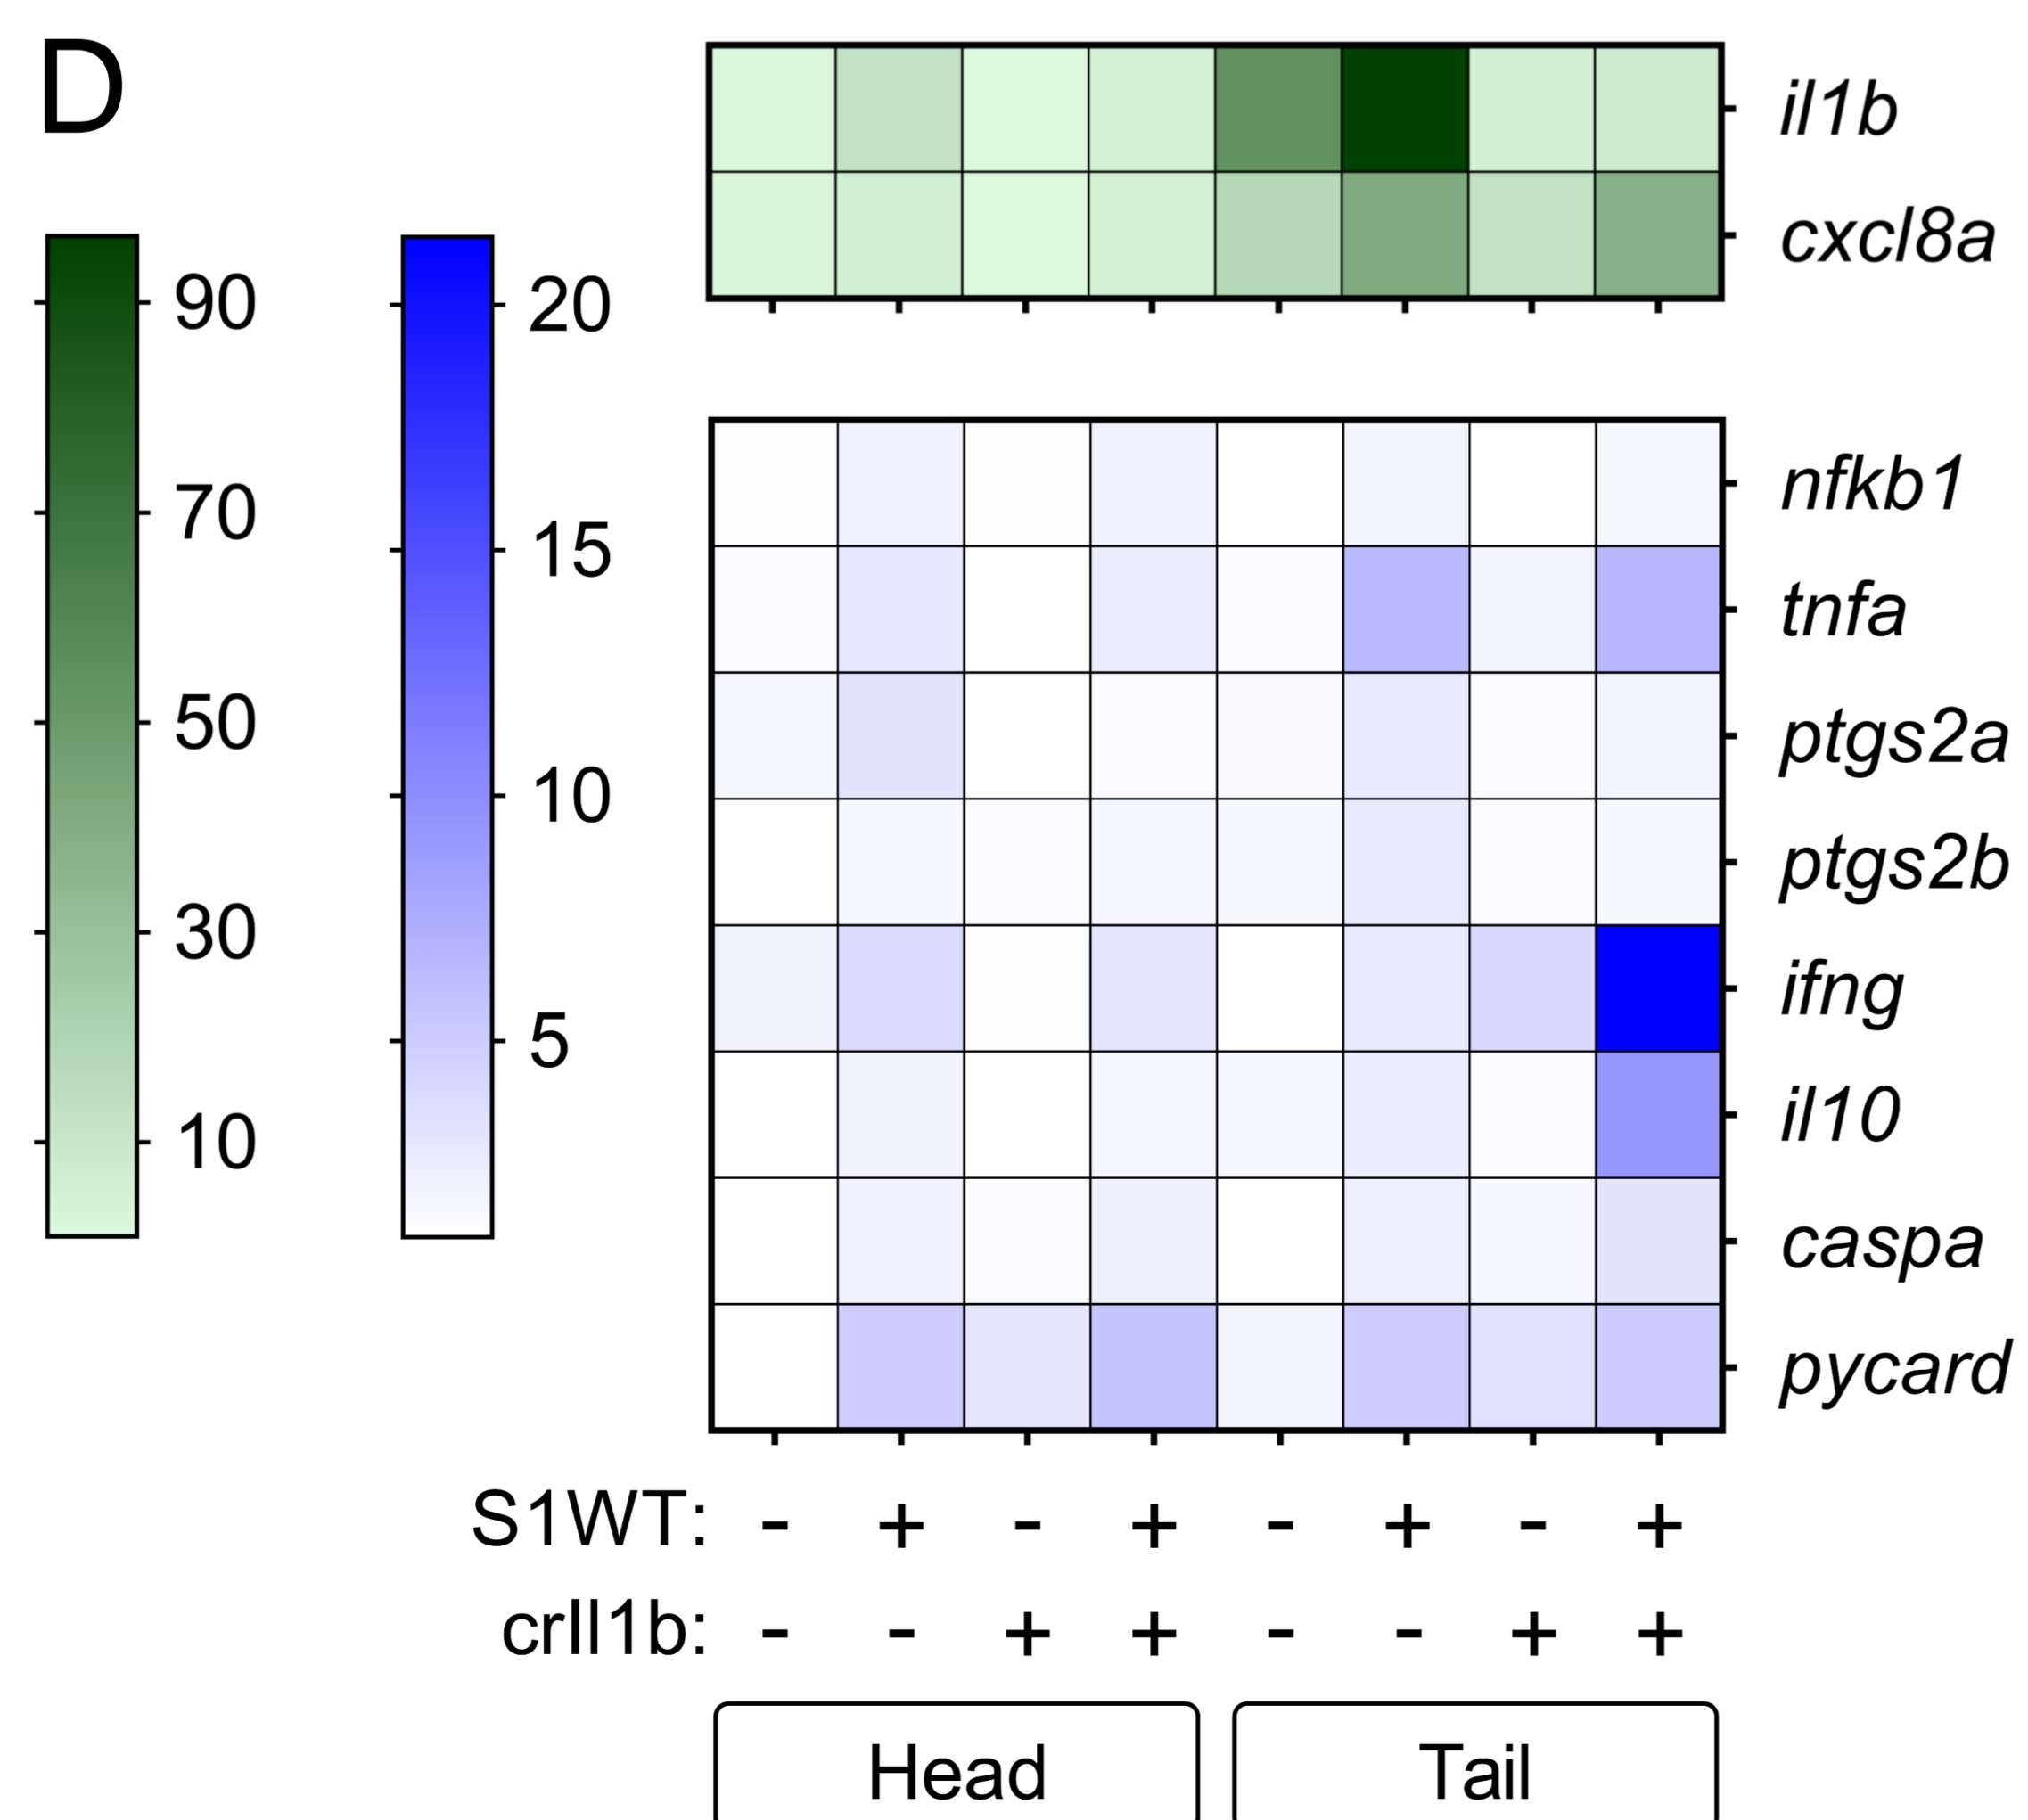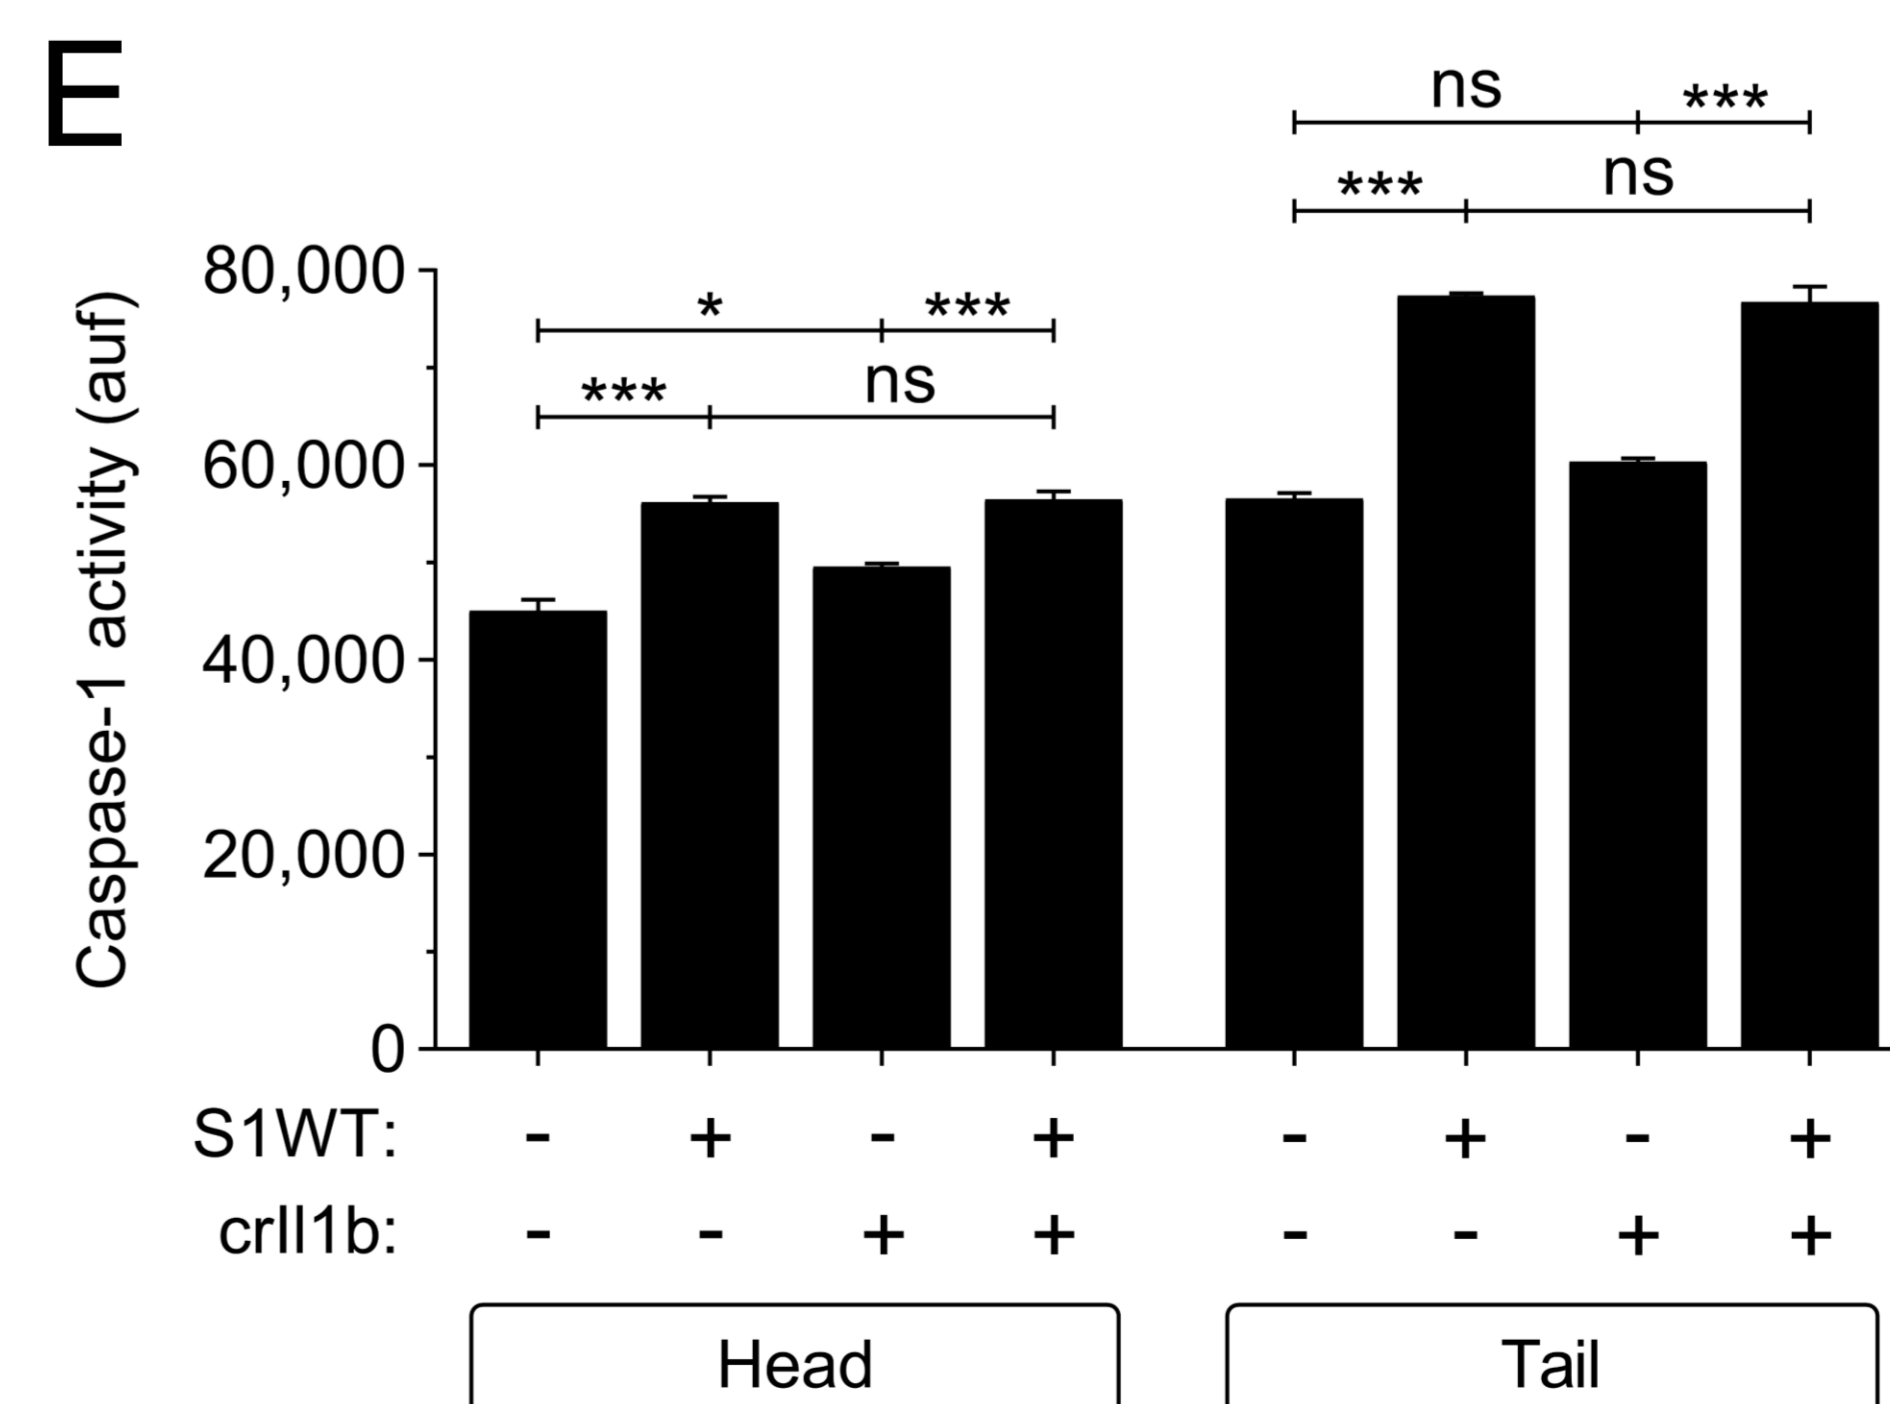

# Figure 3

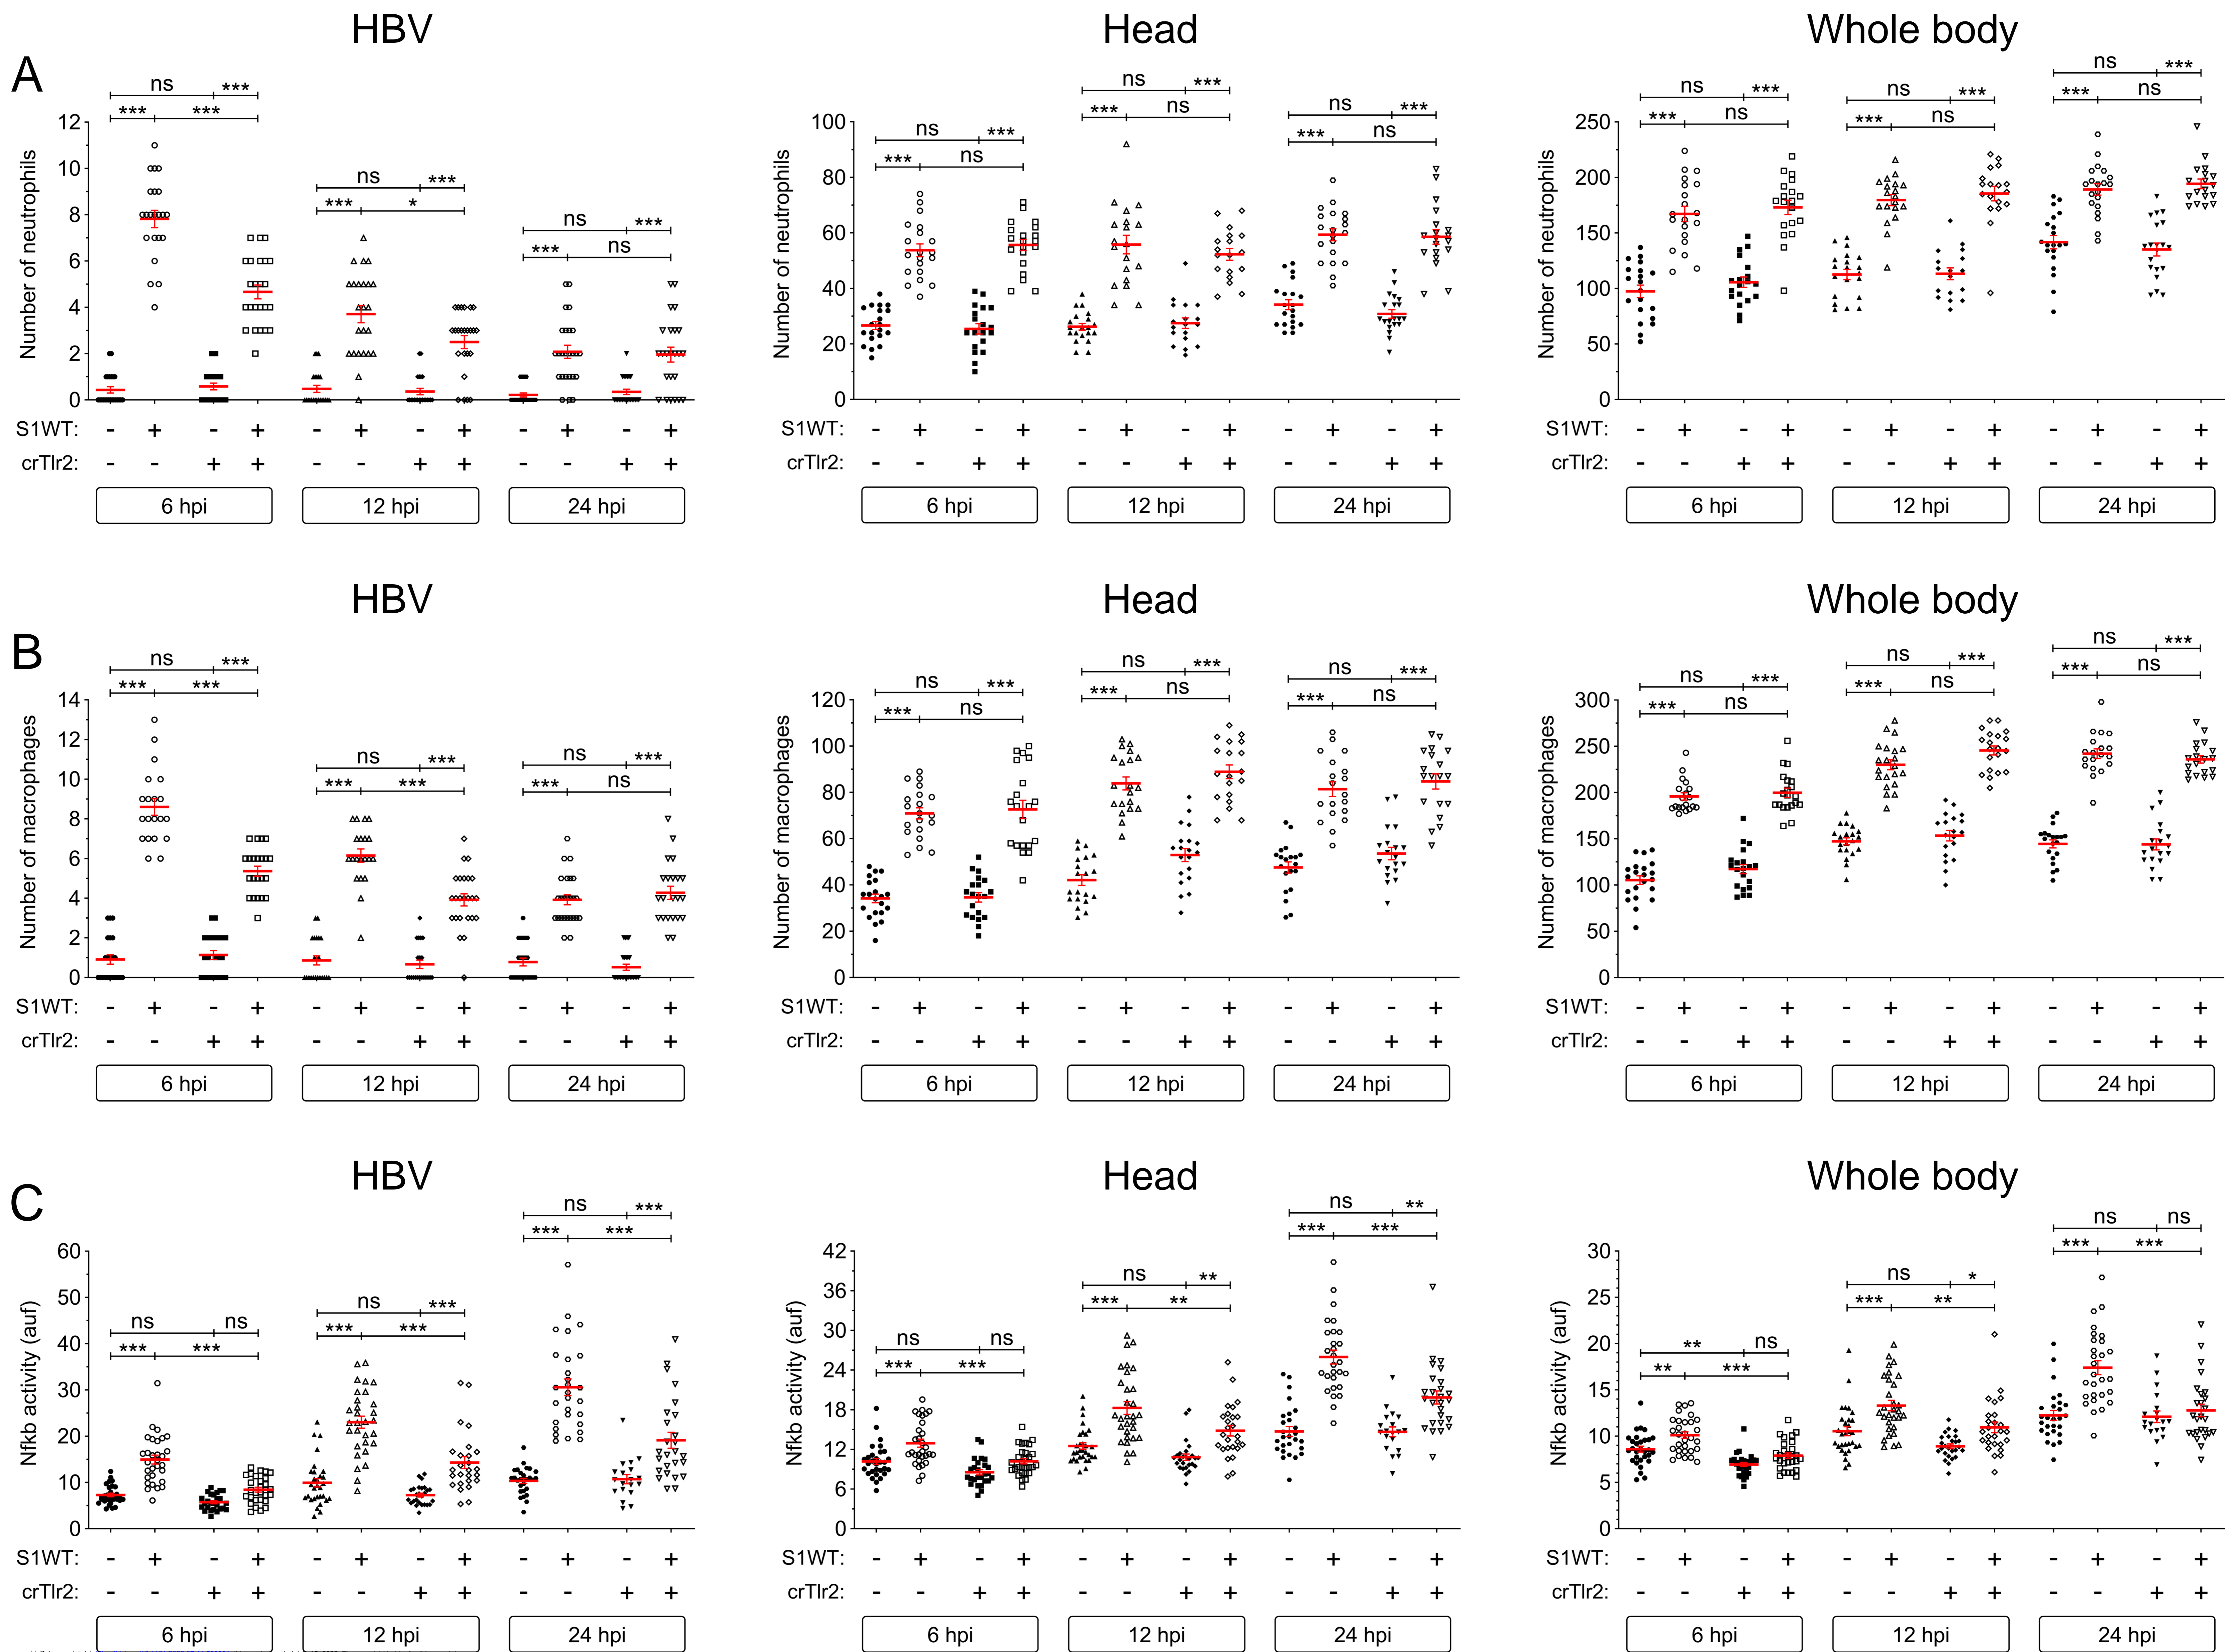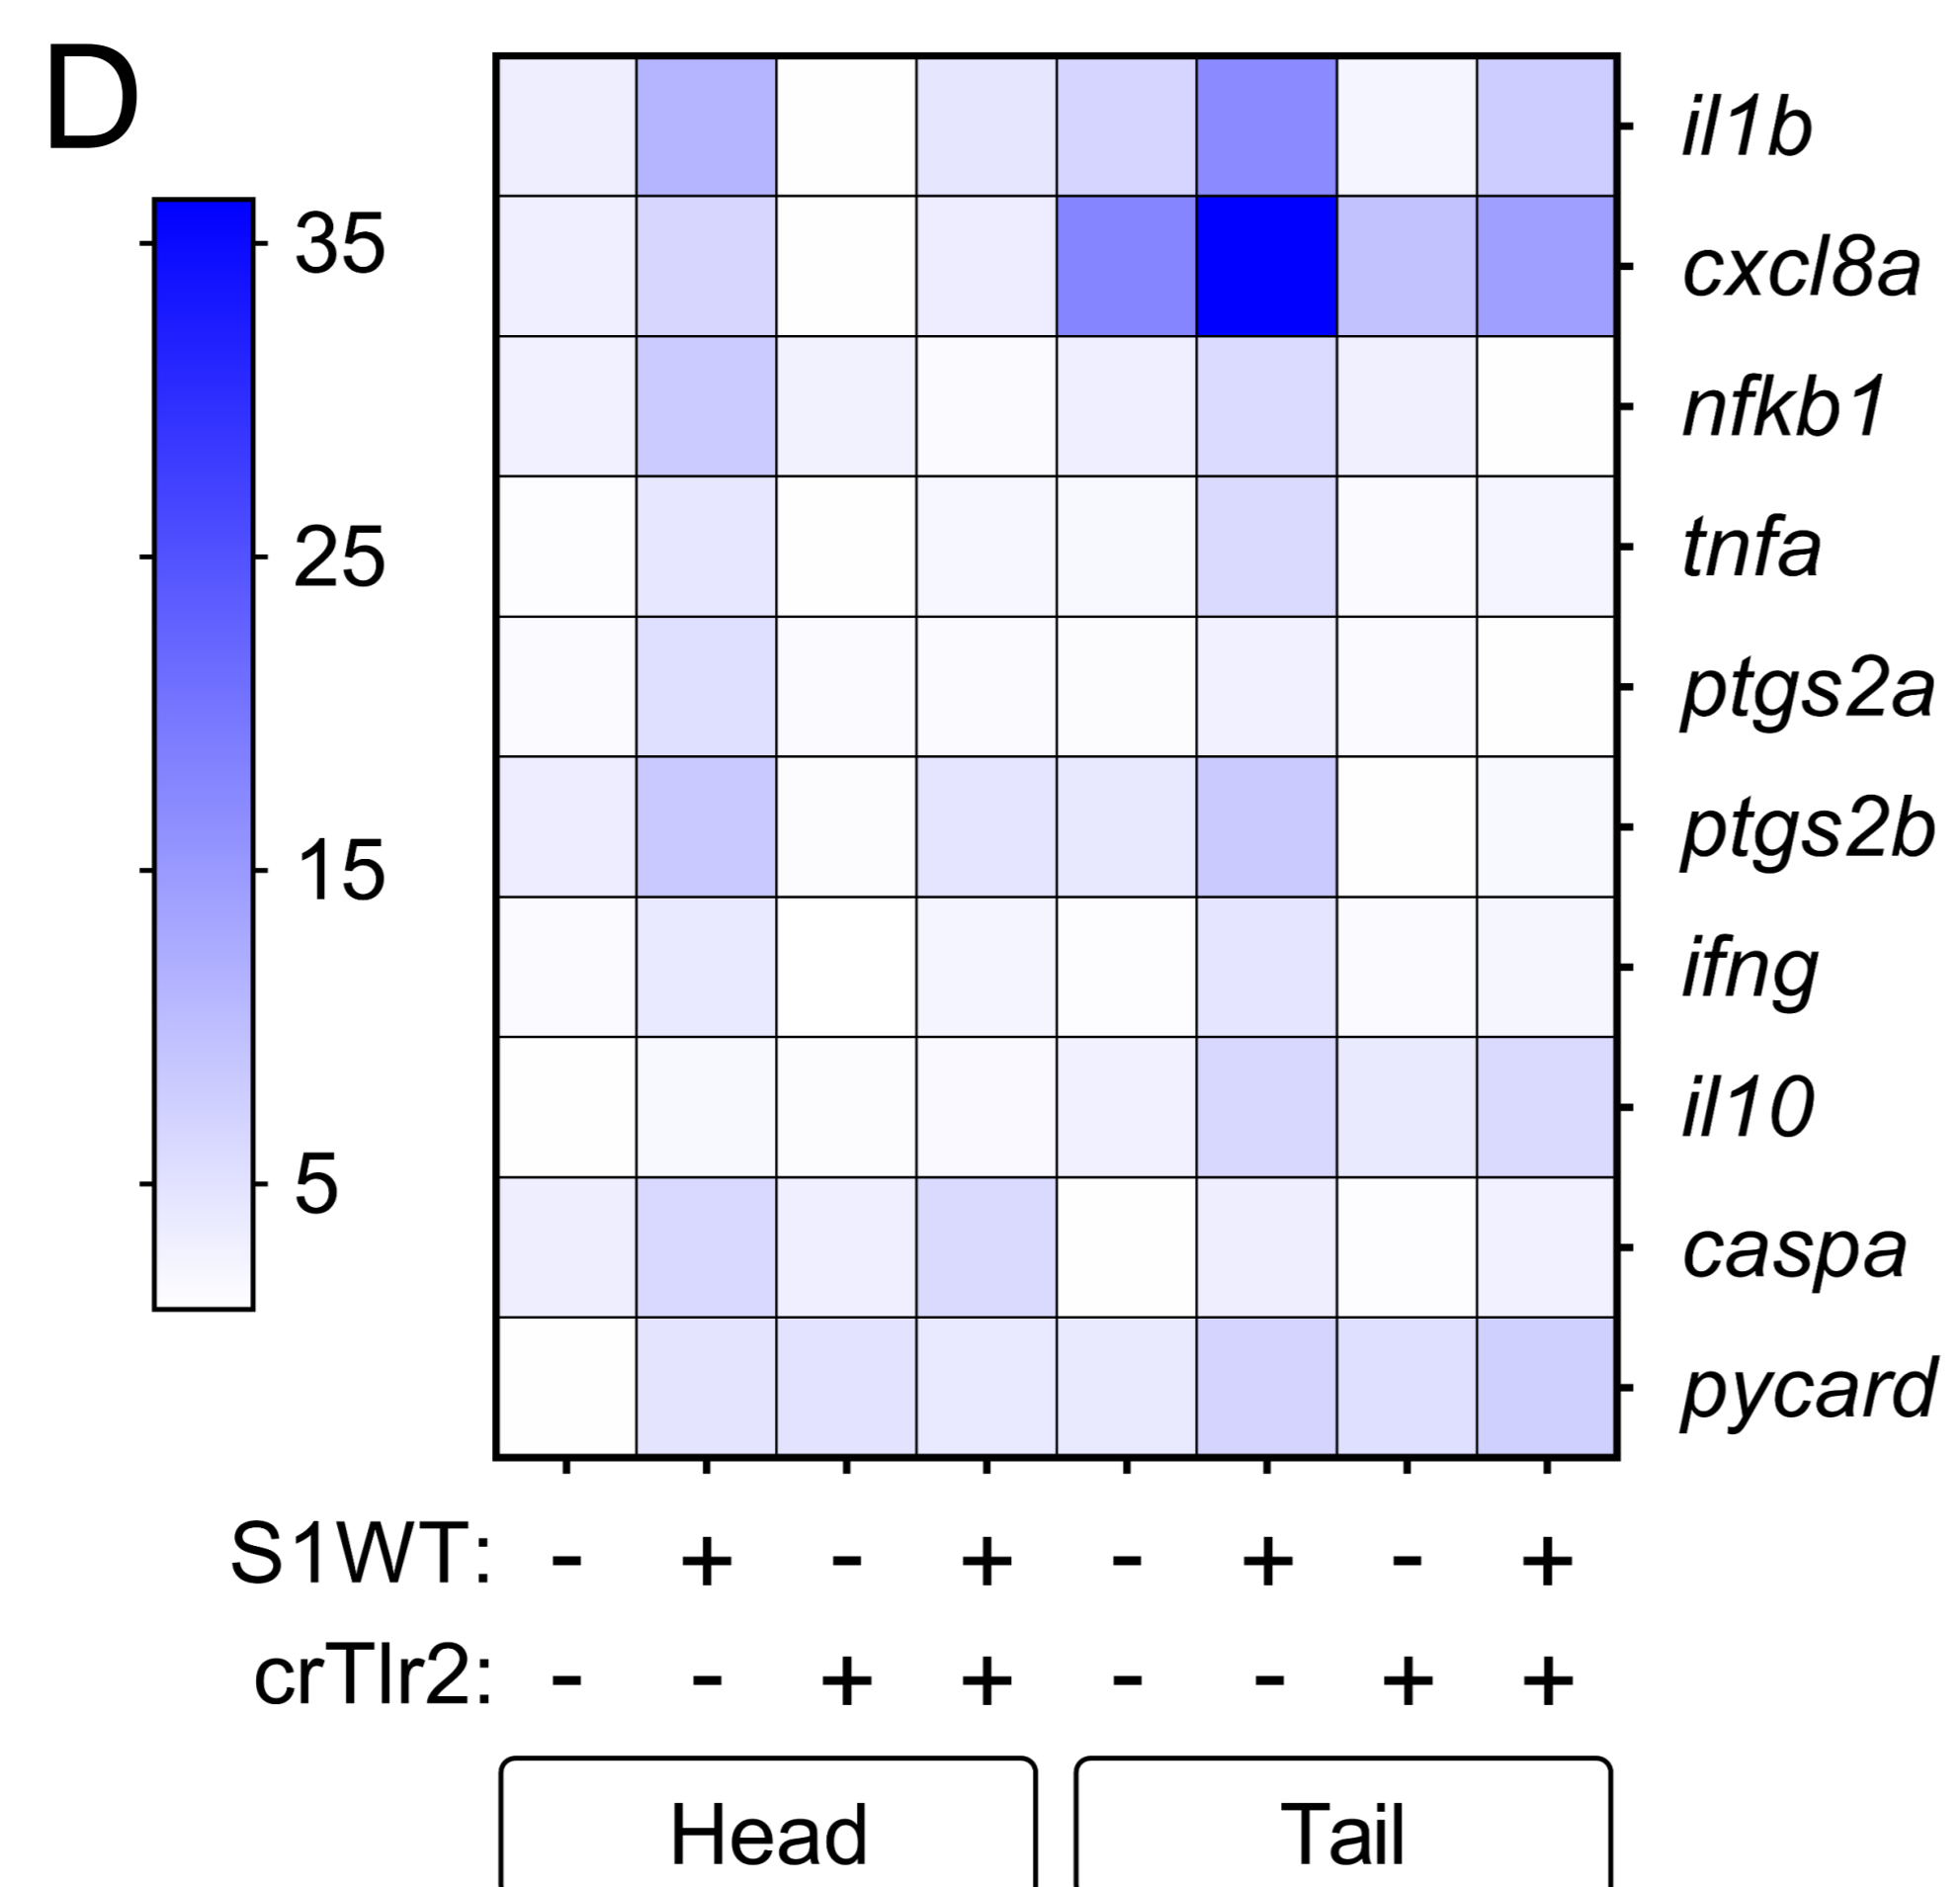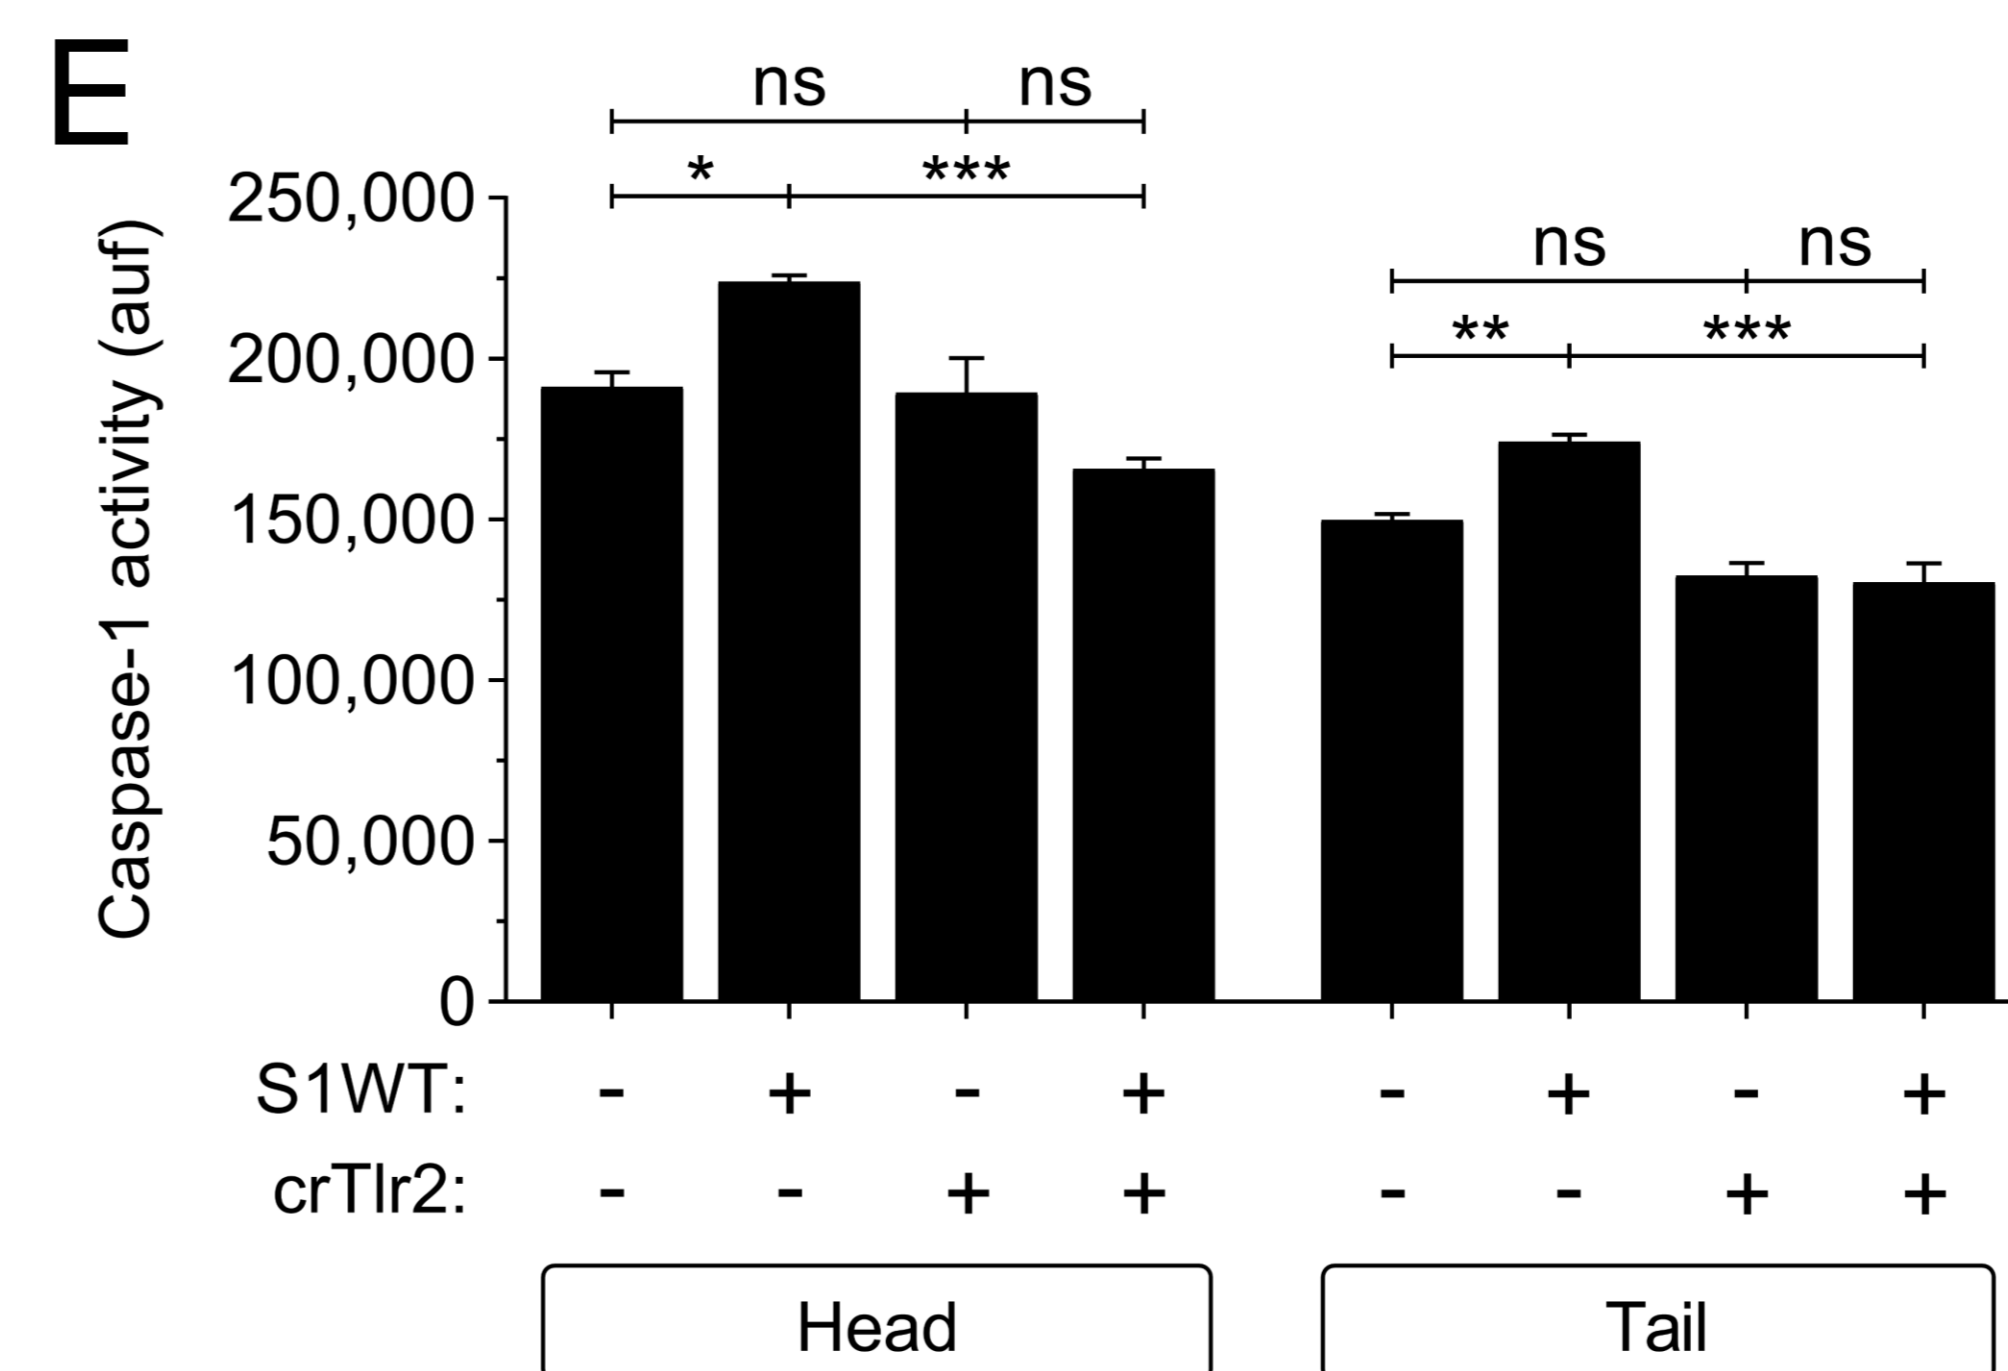

# Figure S1

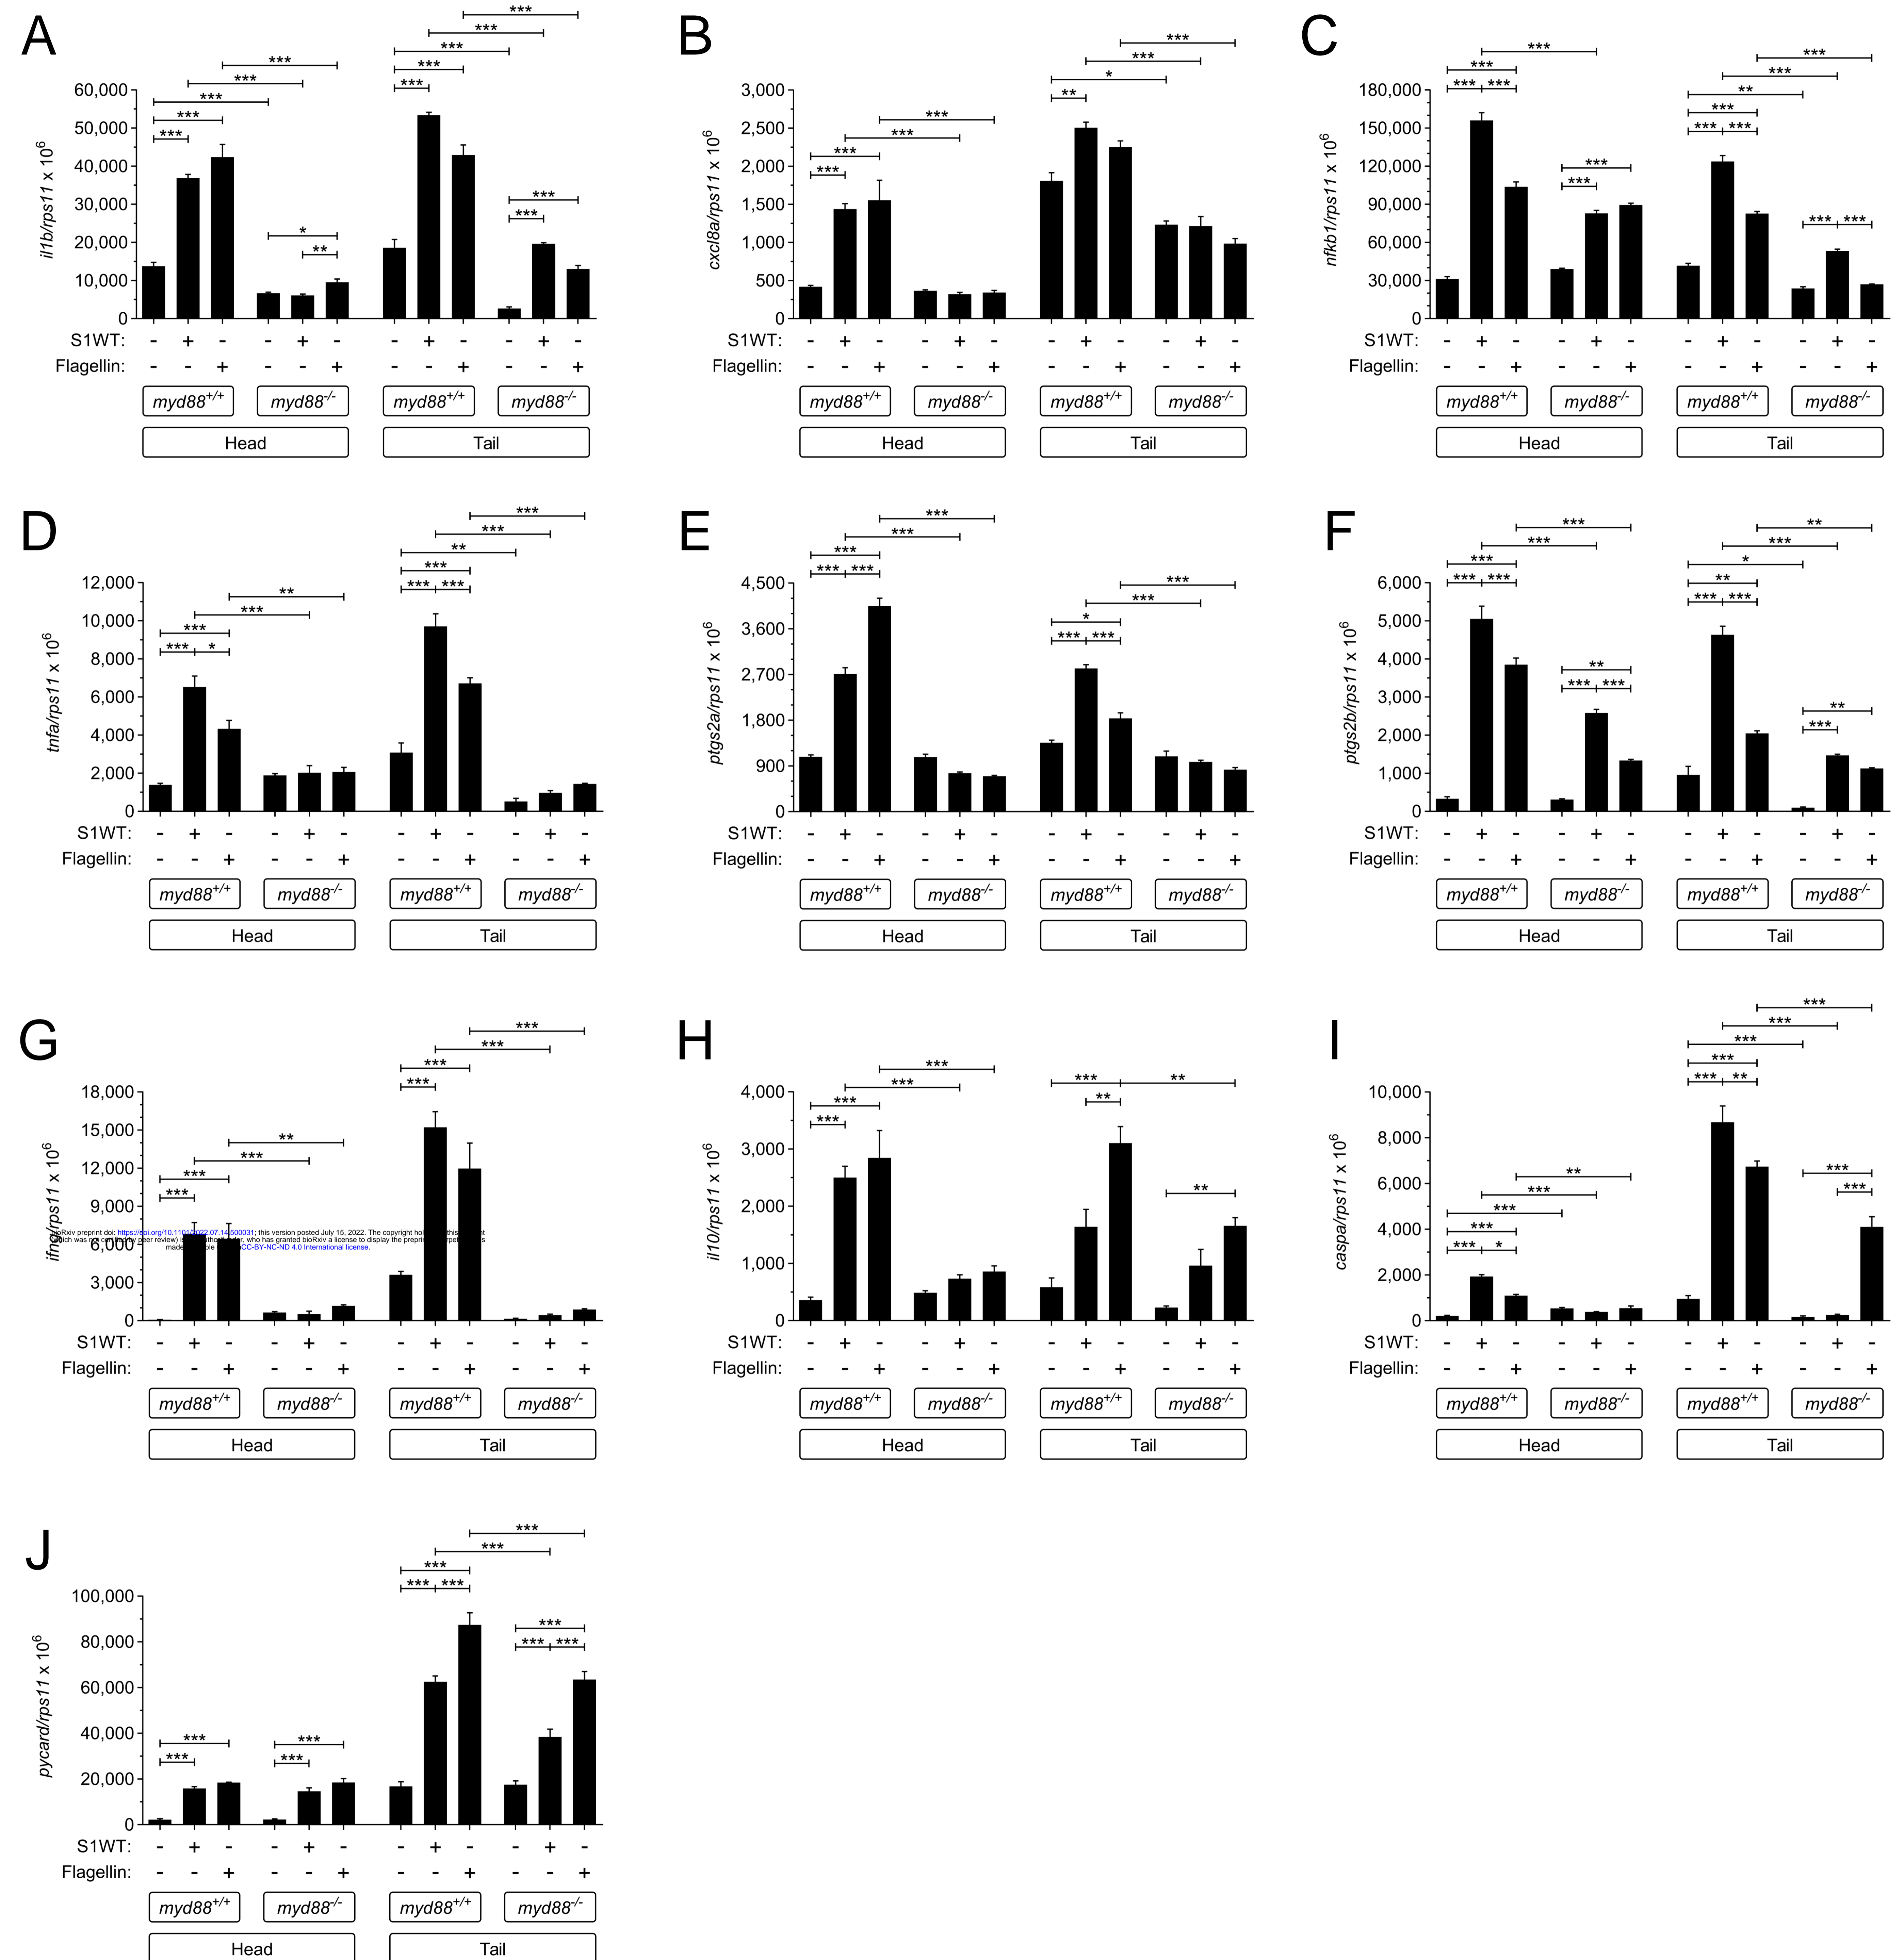

# Figure S2

## A: crll1b

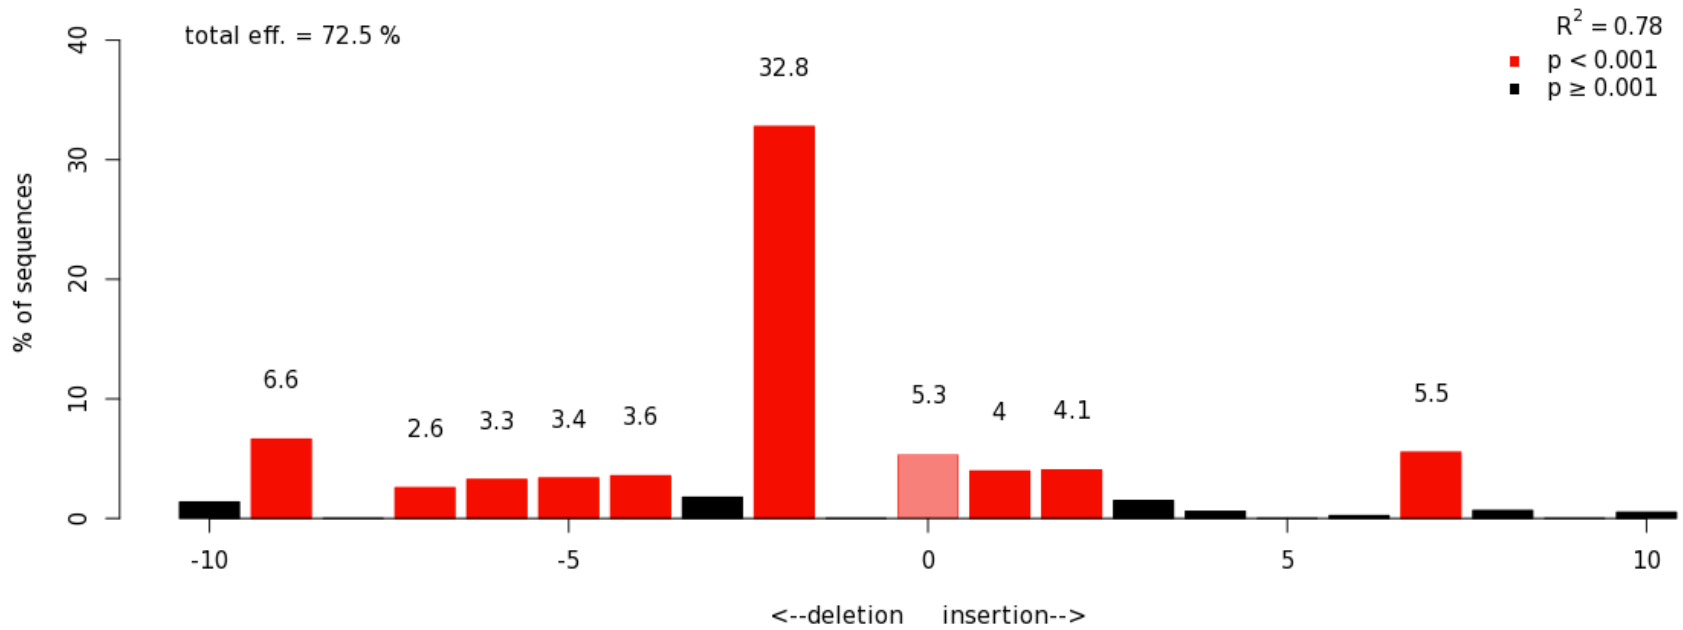

## B: crTlr2

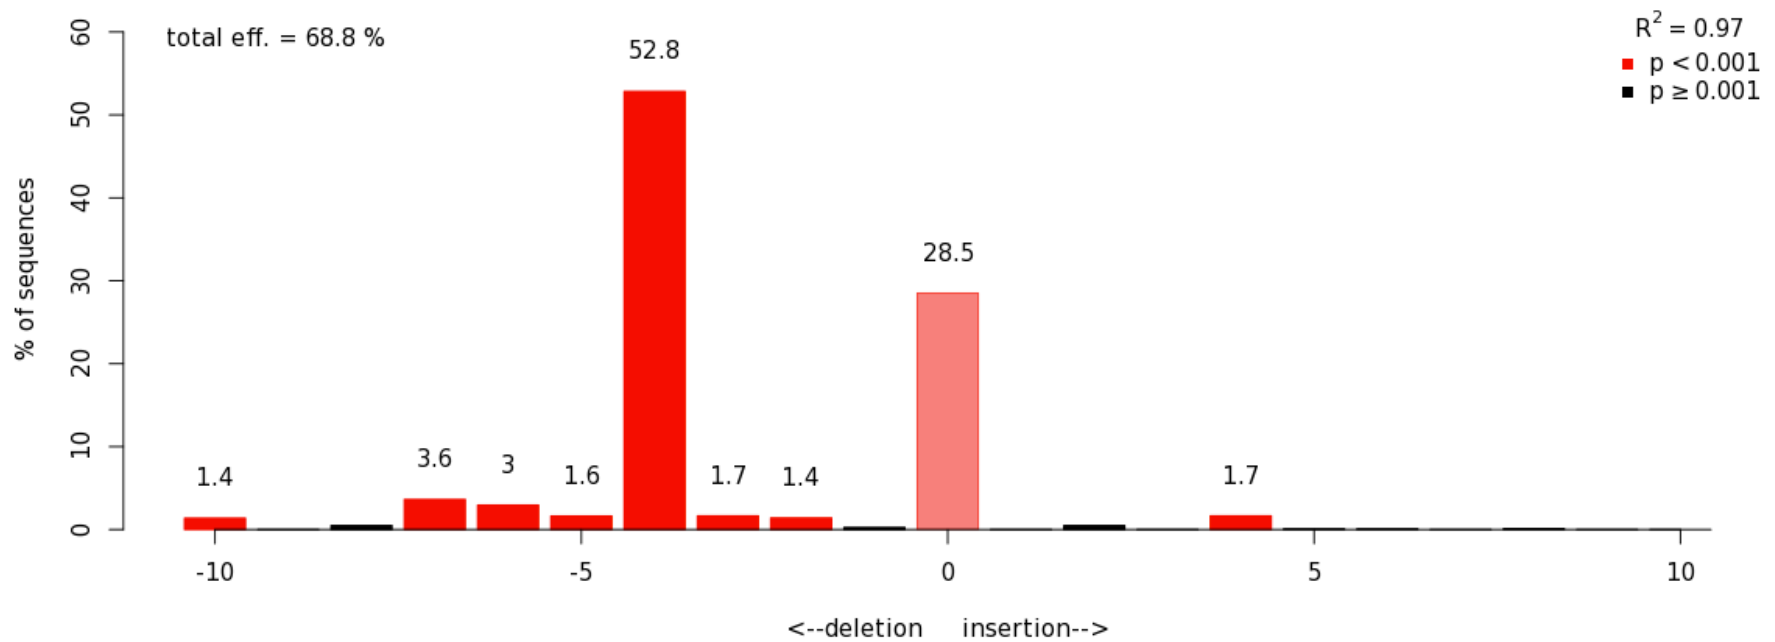

# Figure S3

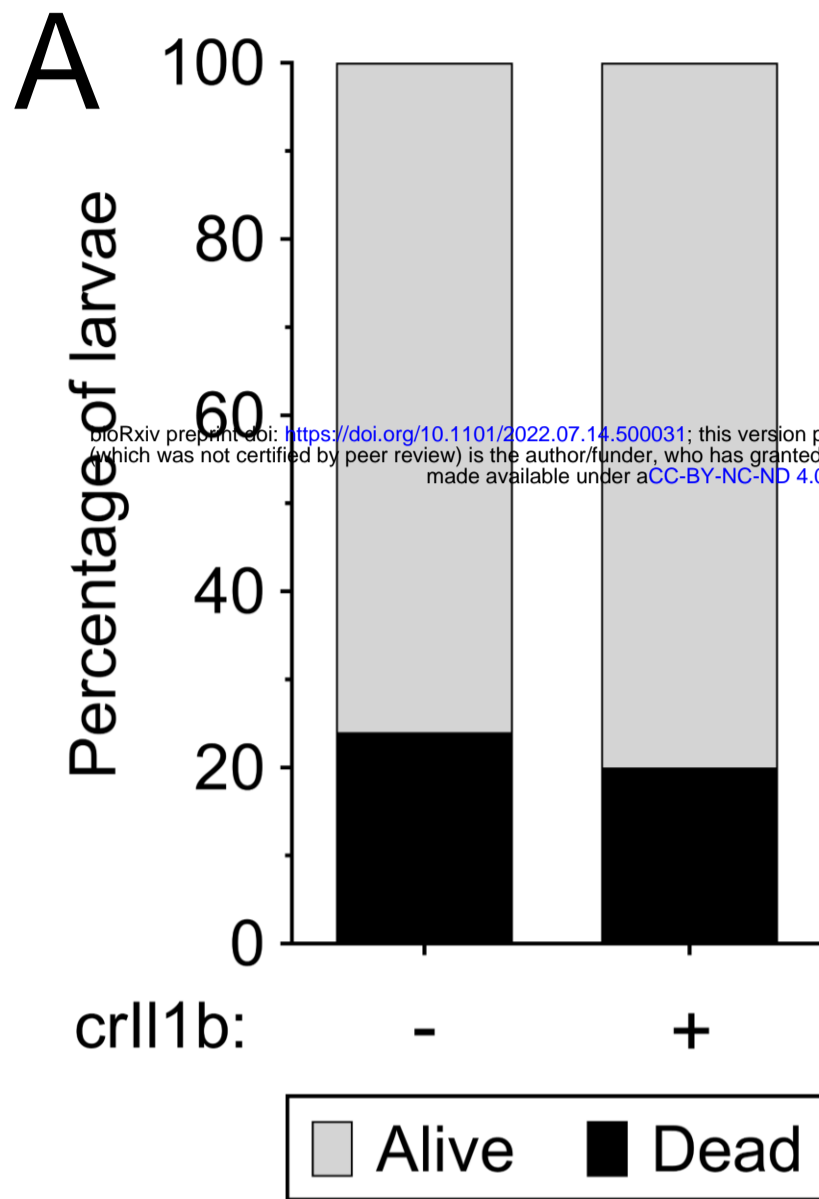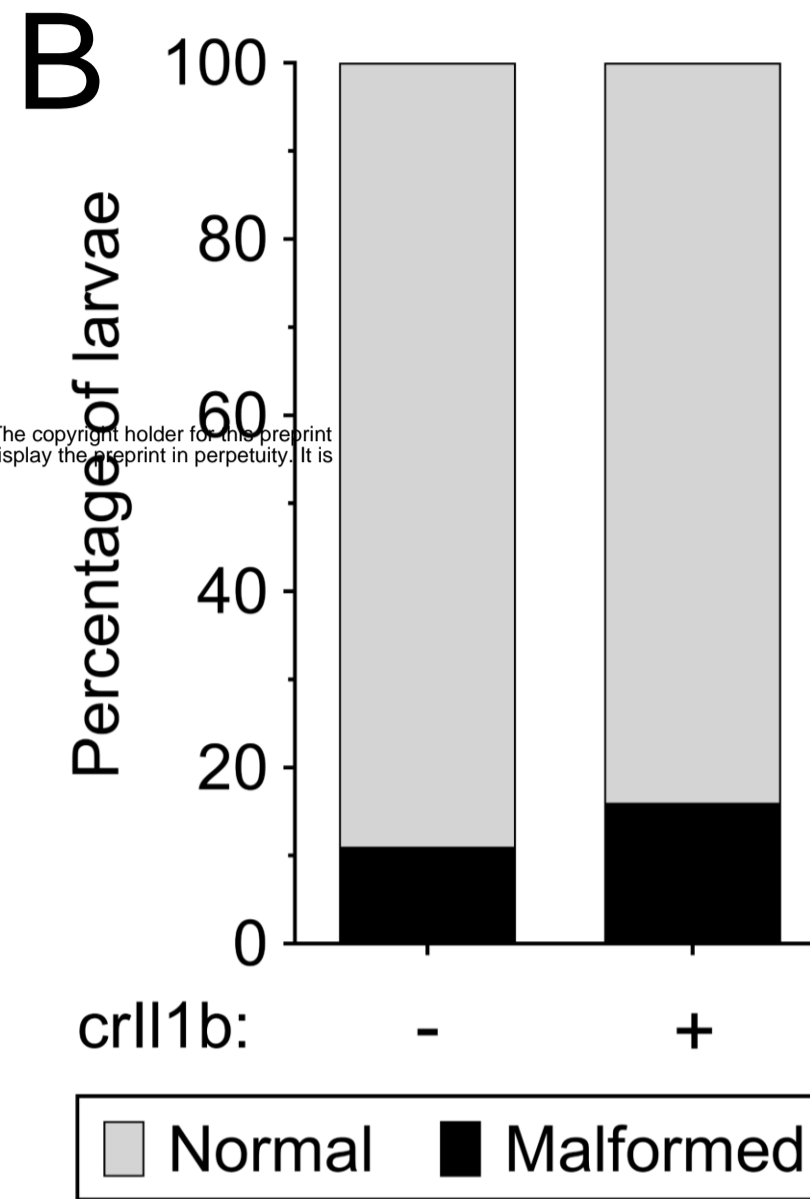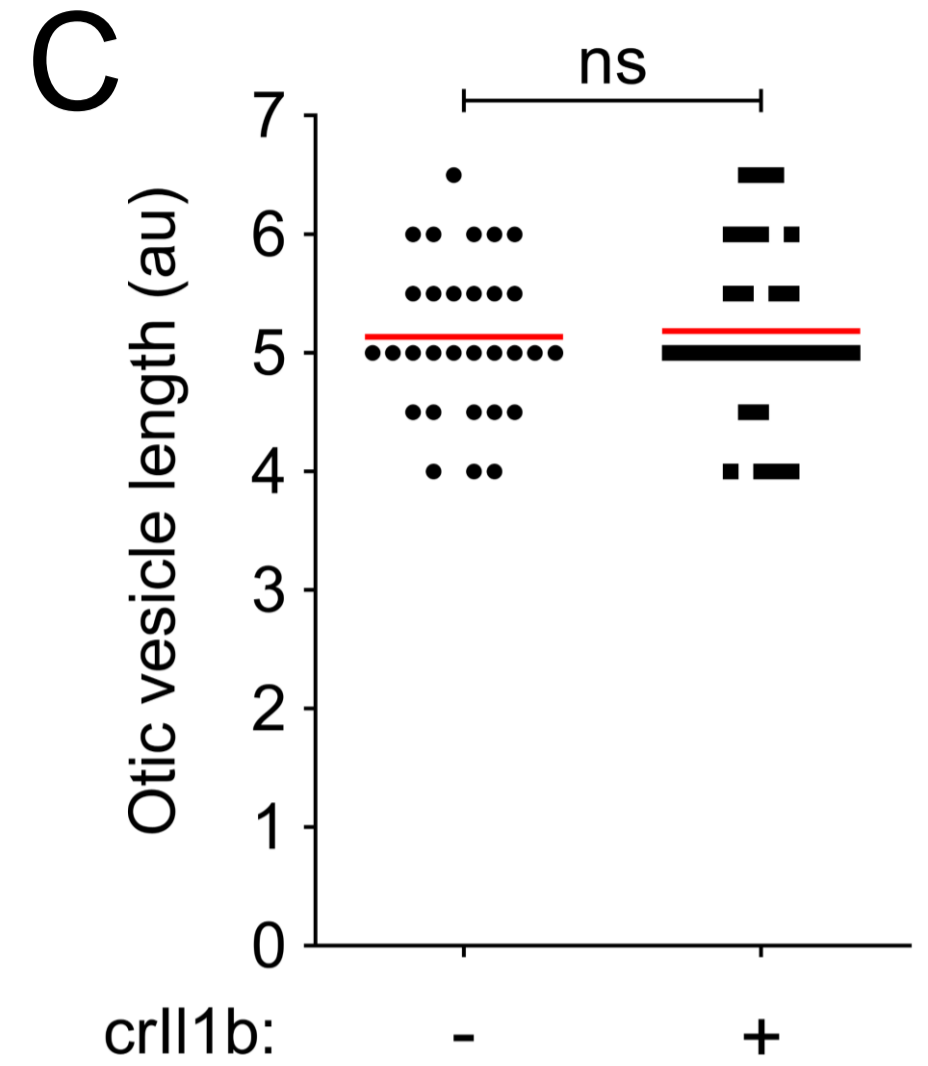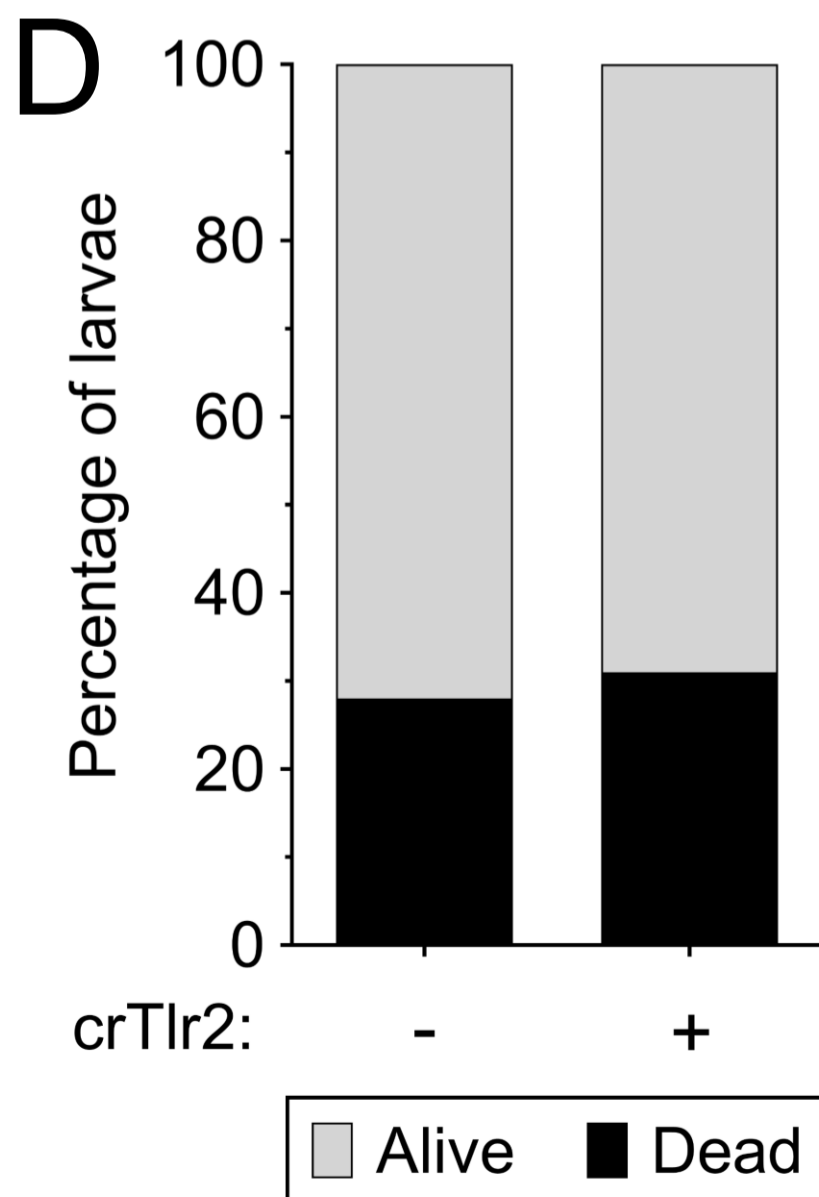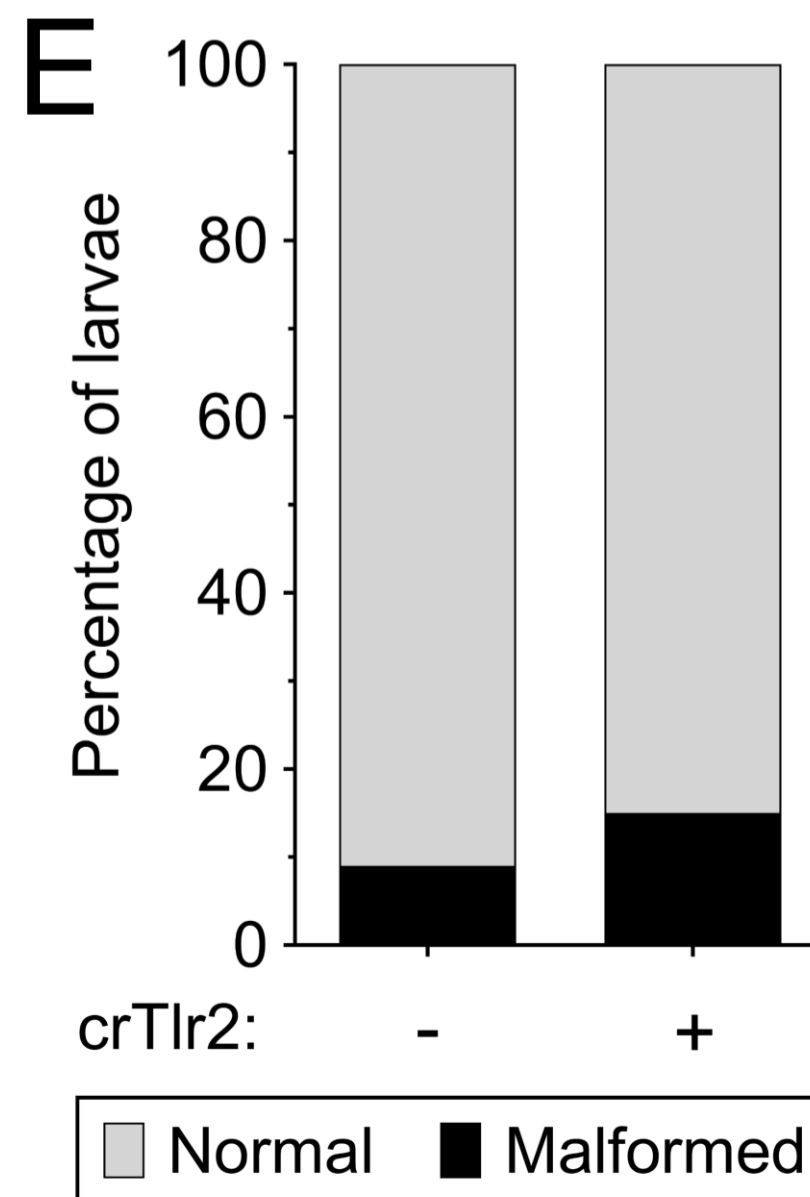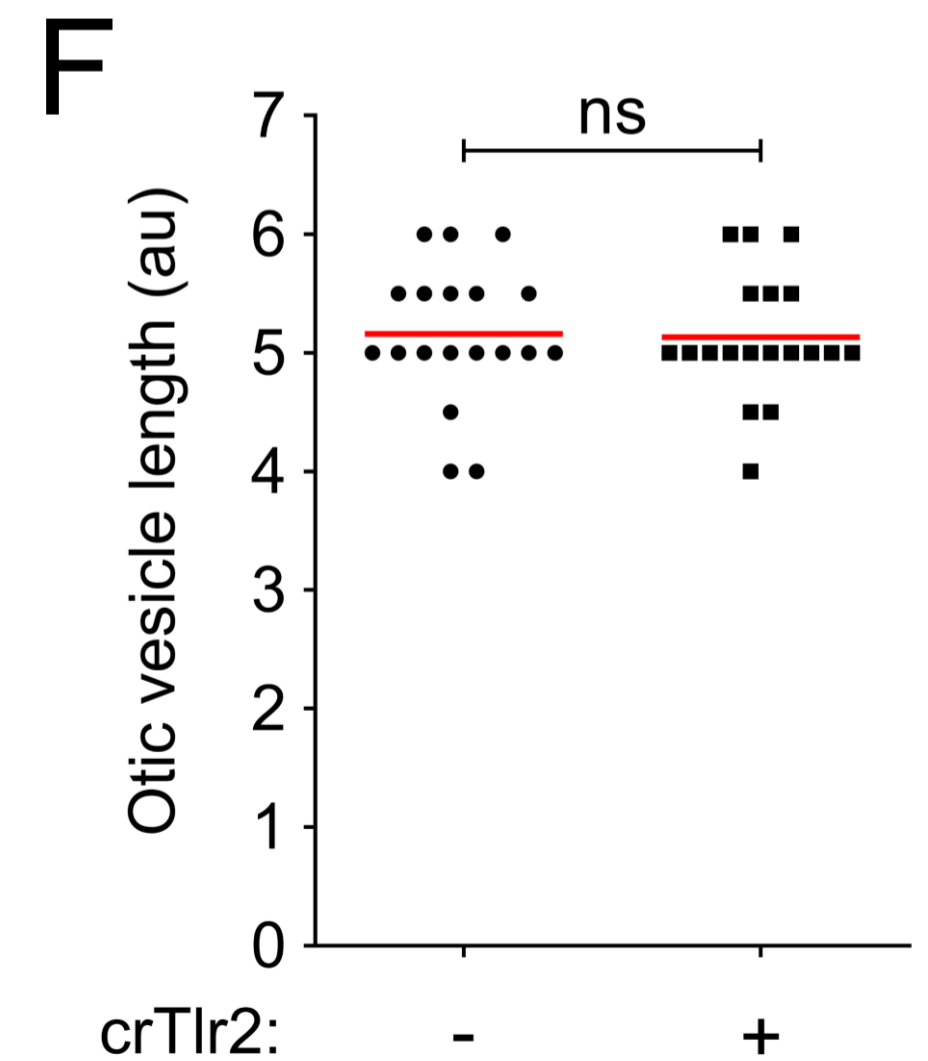

# Figure S4

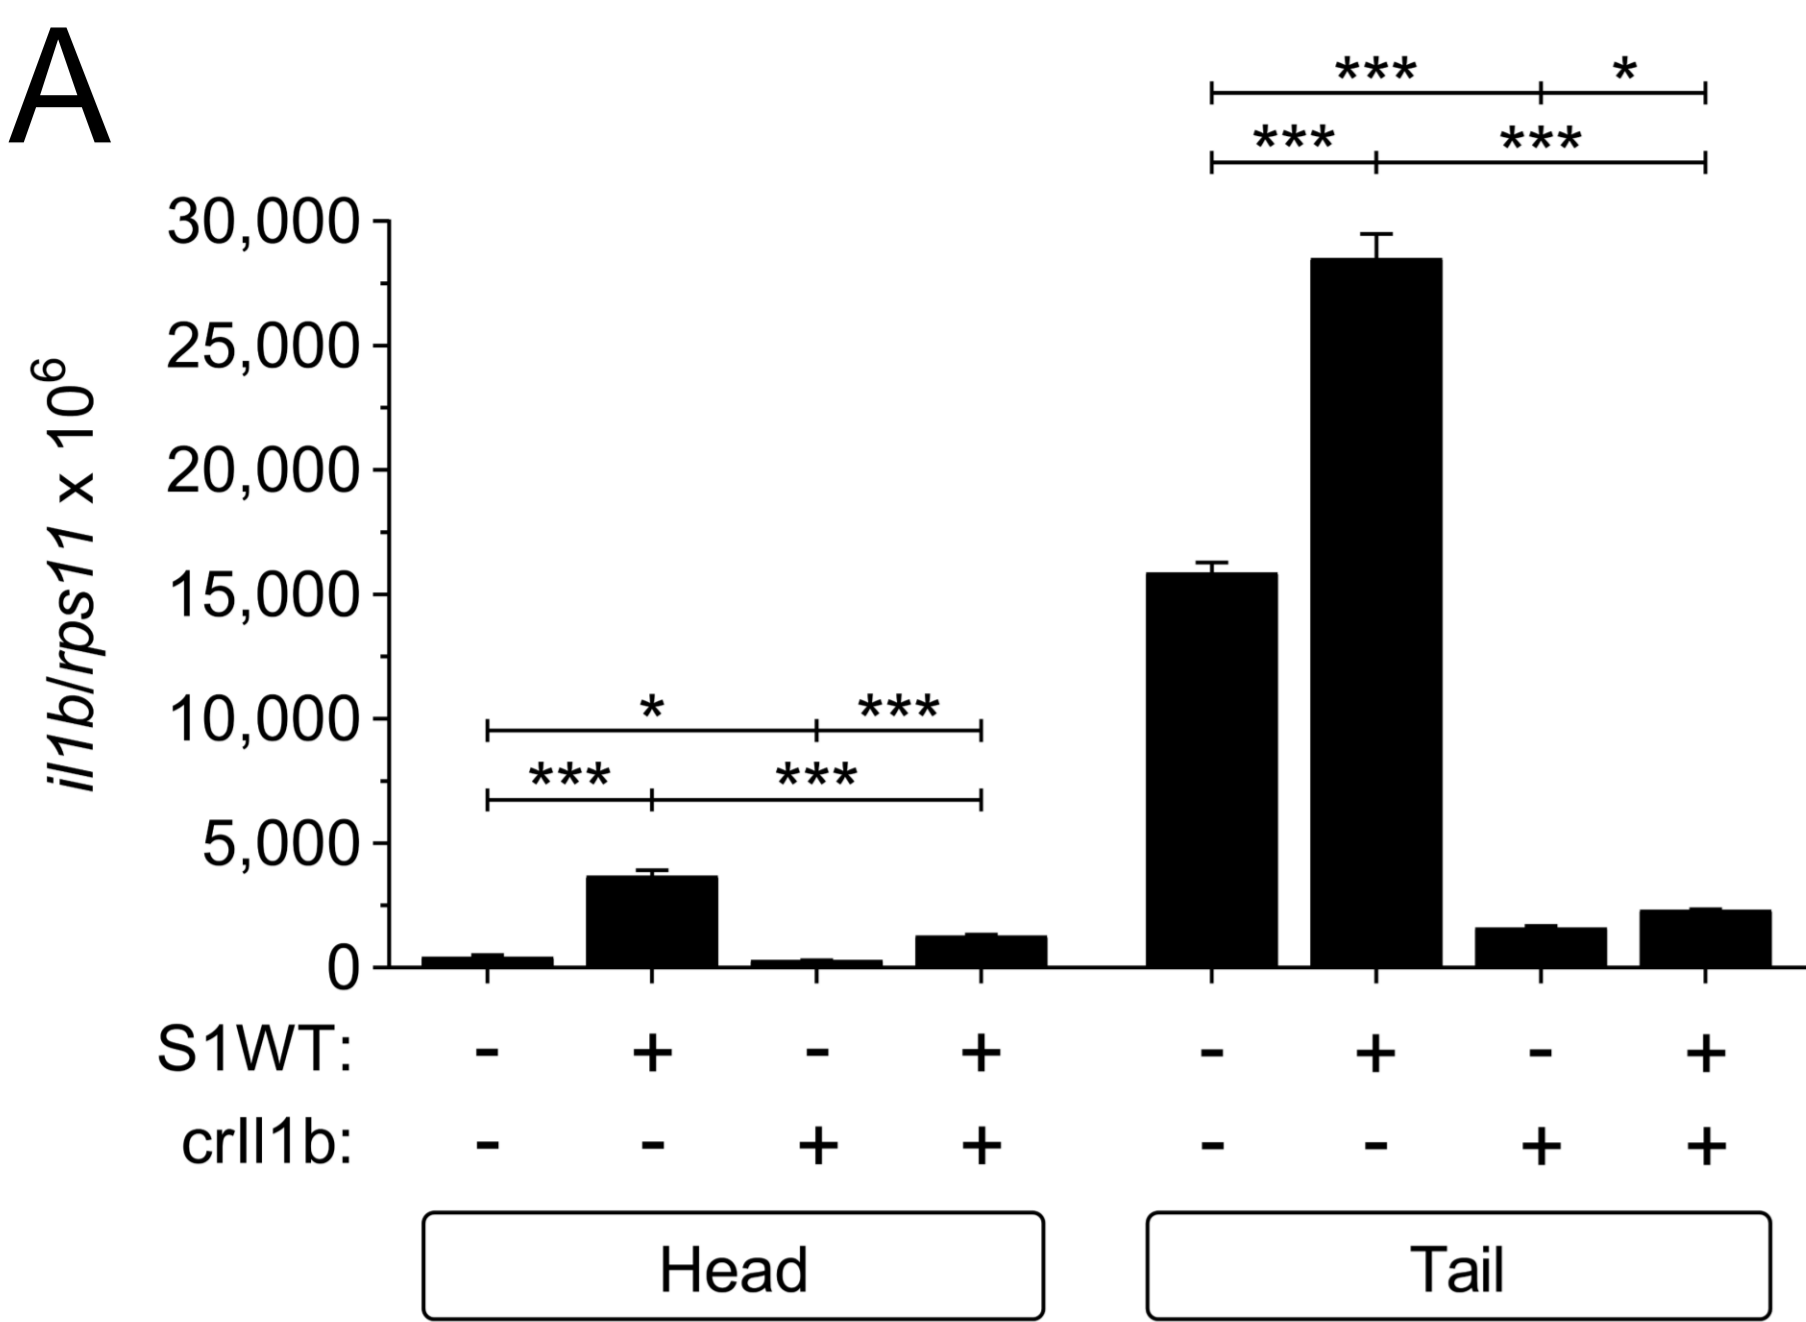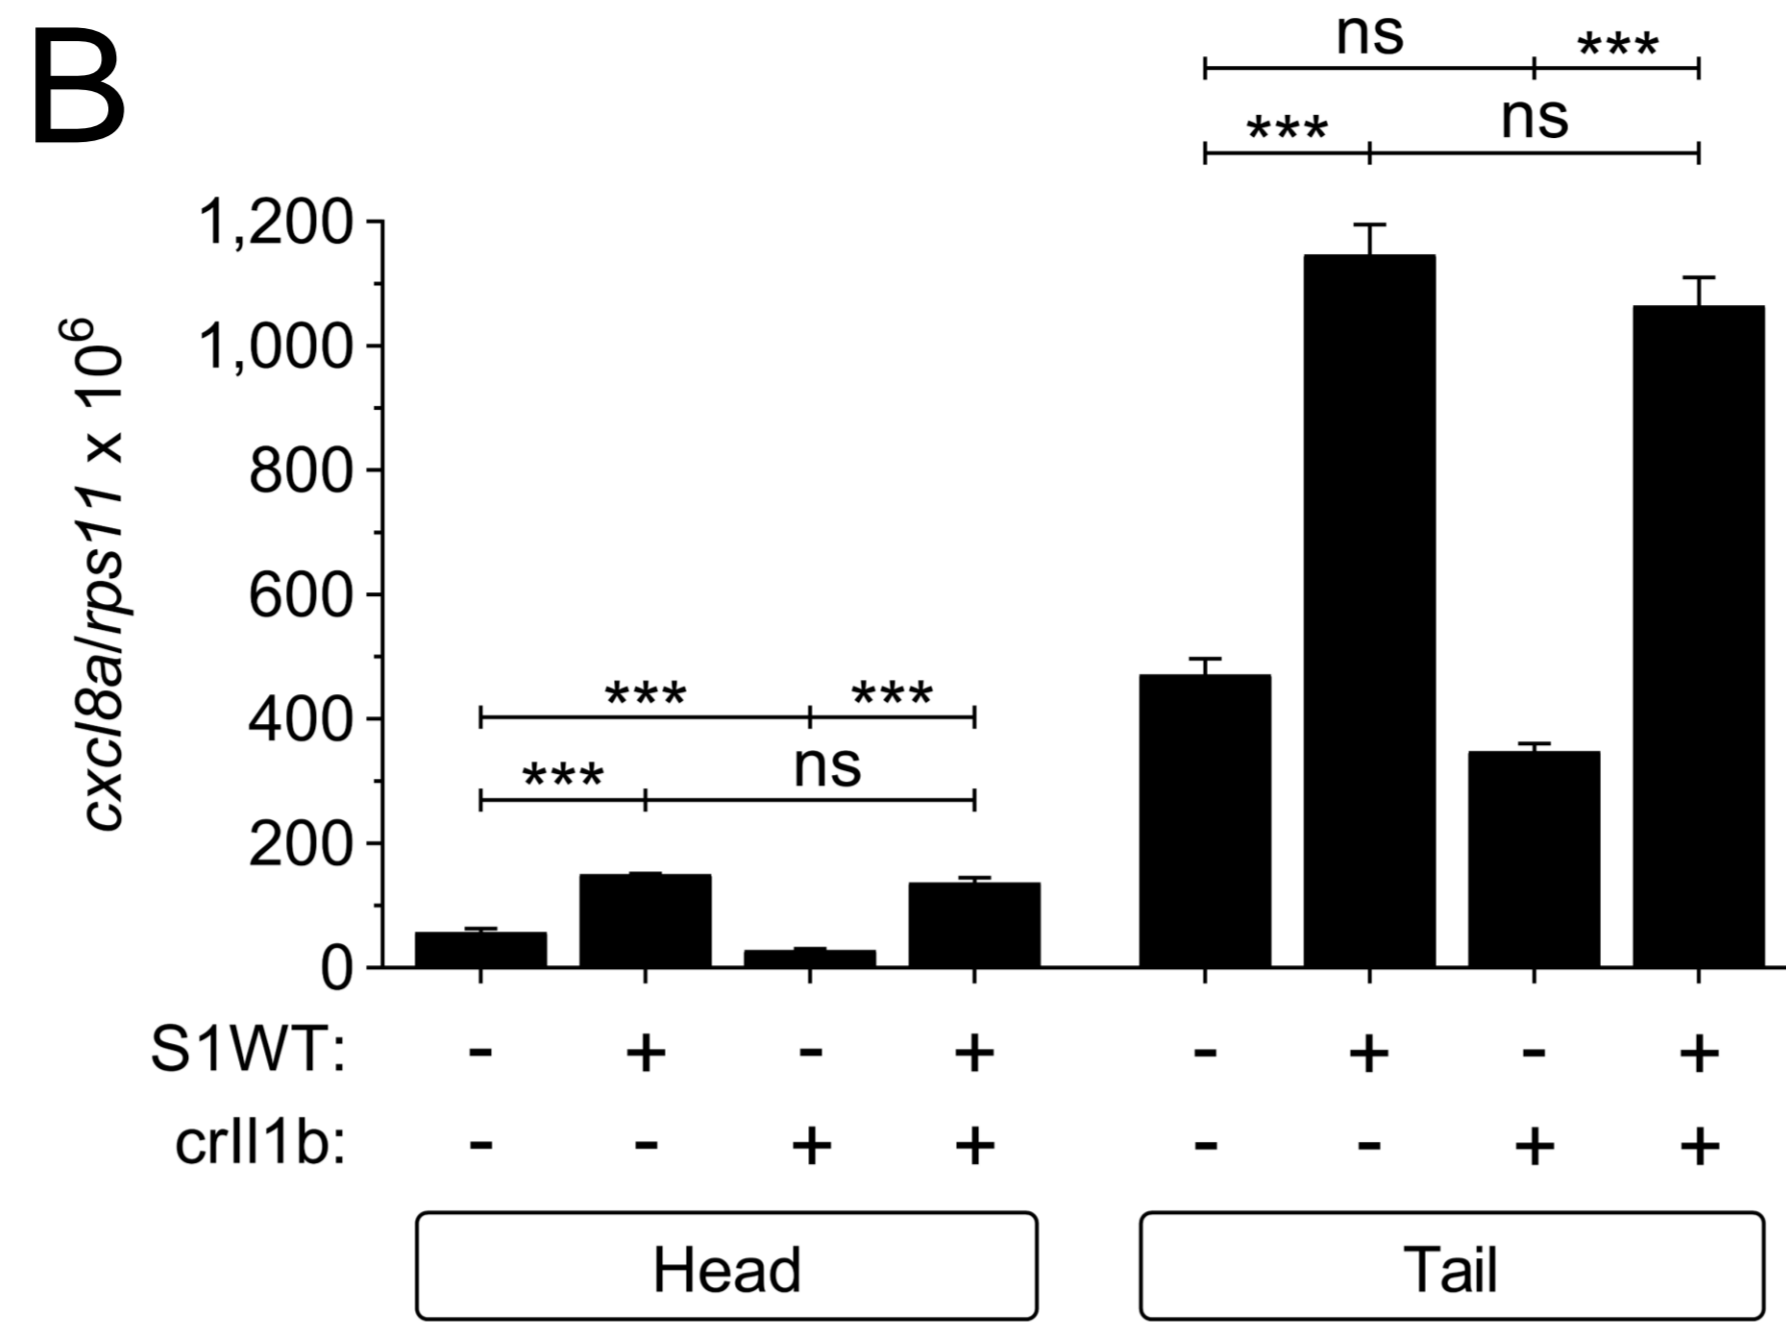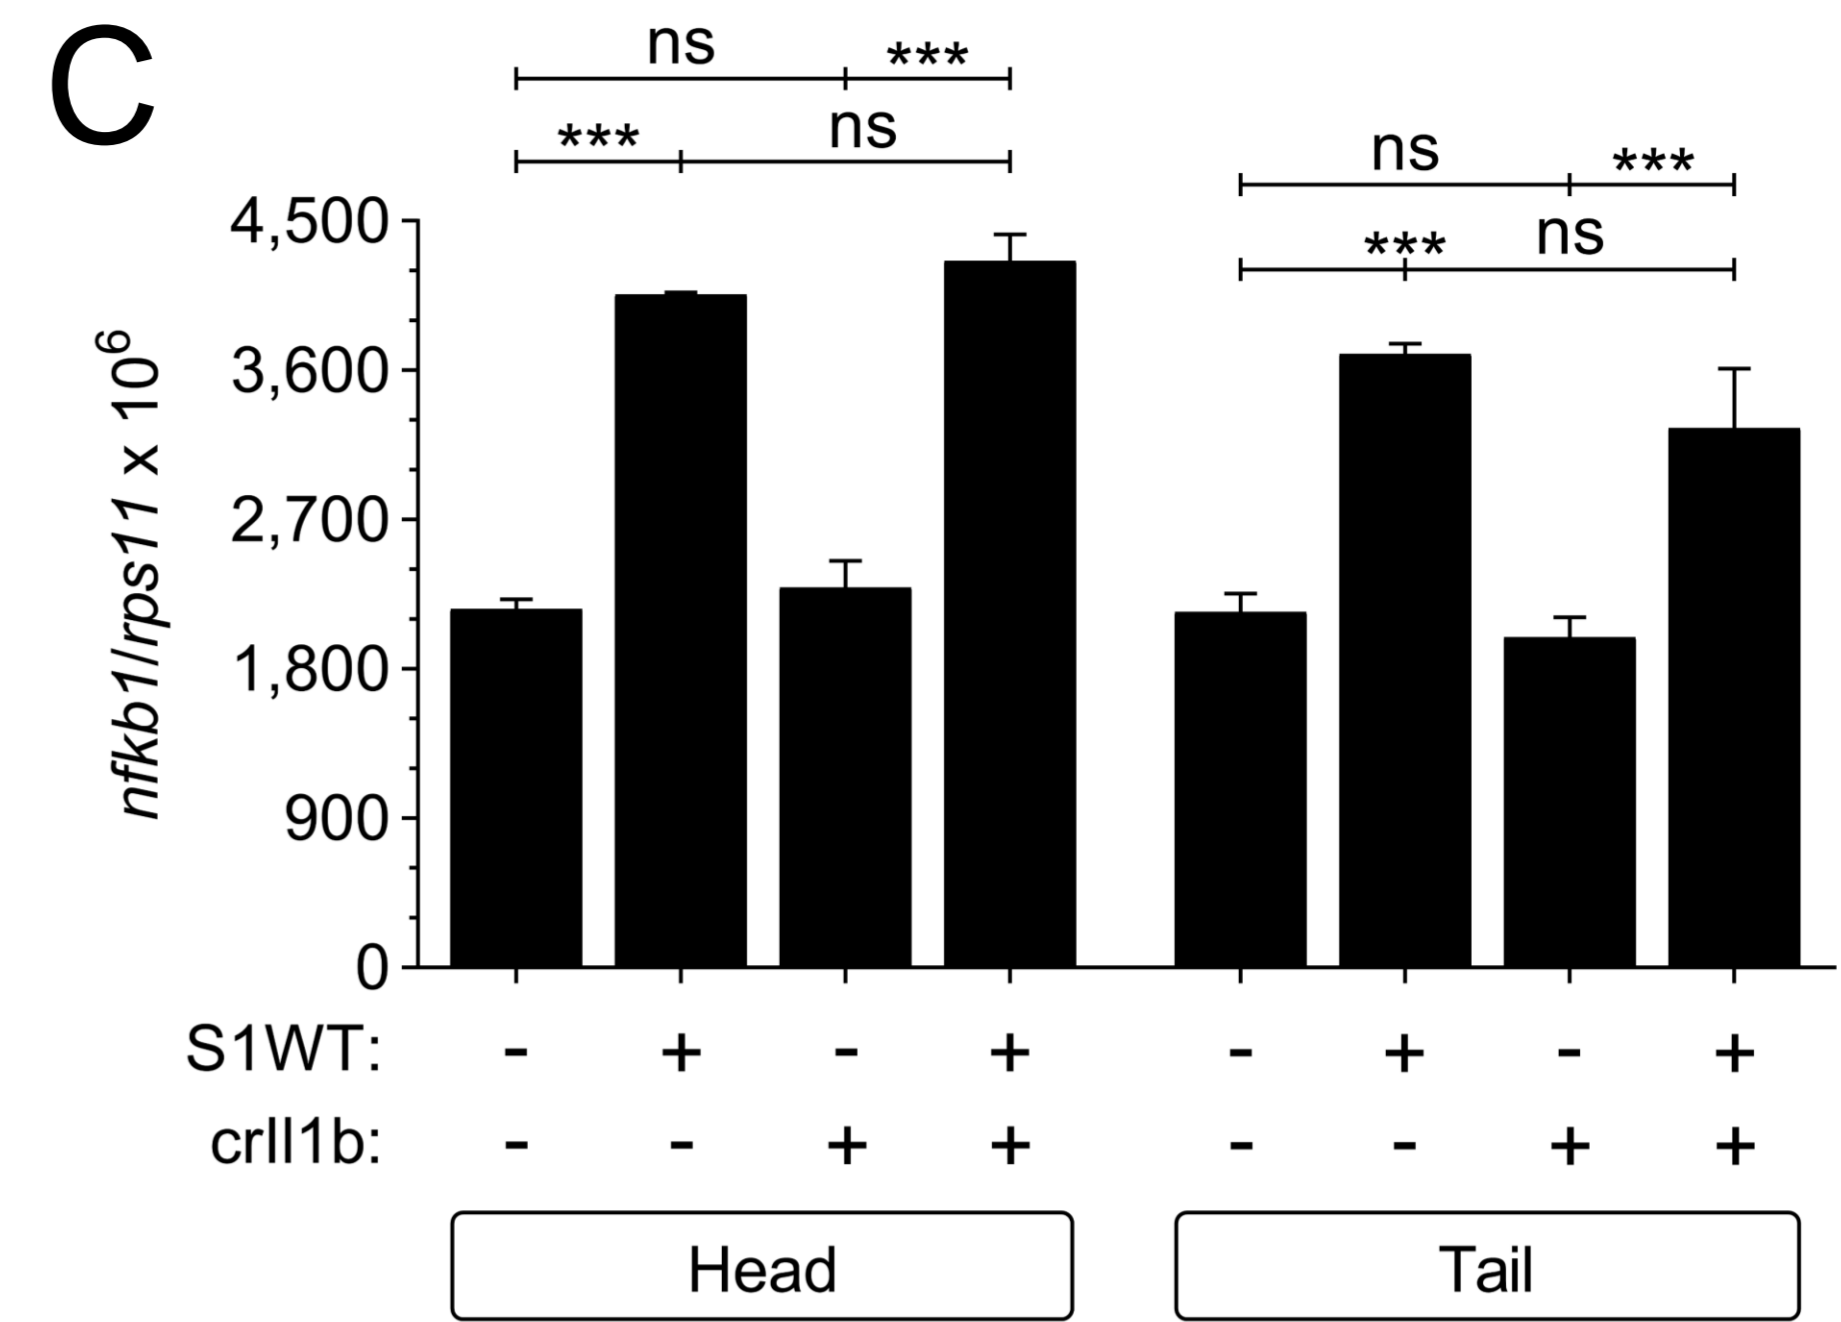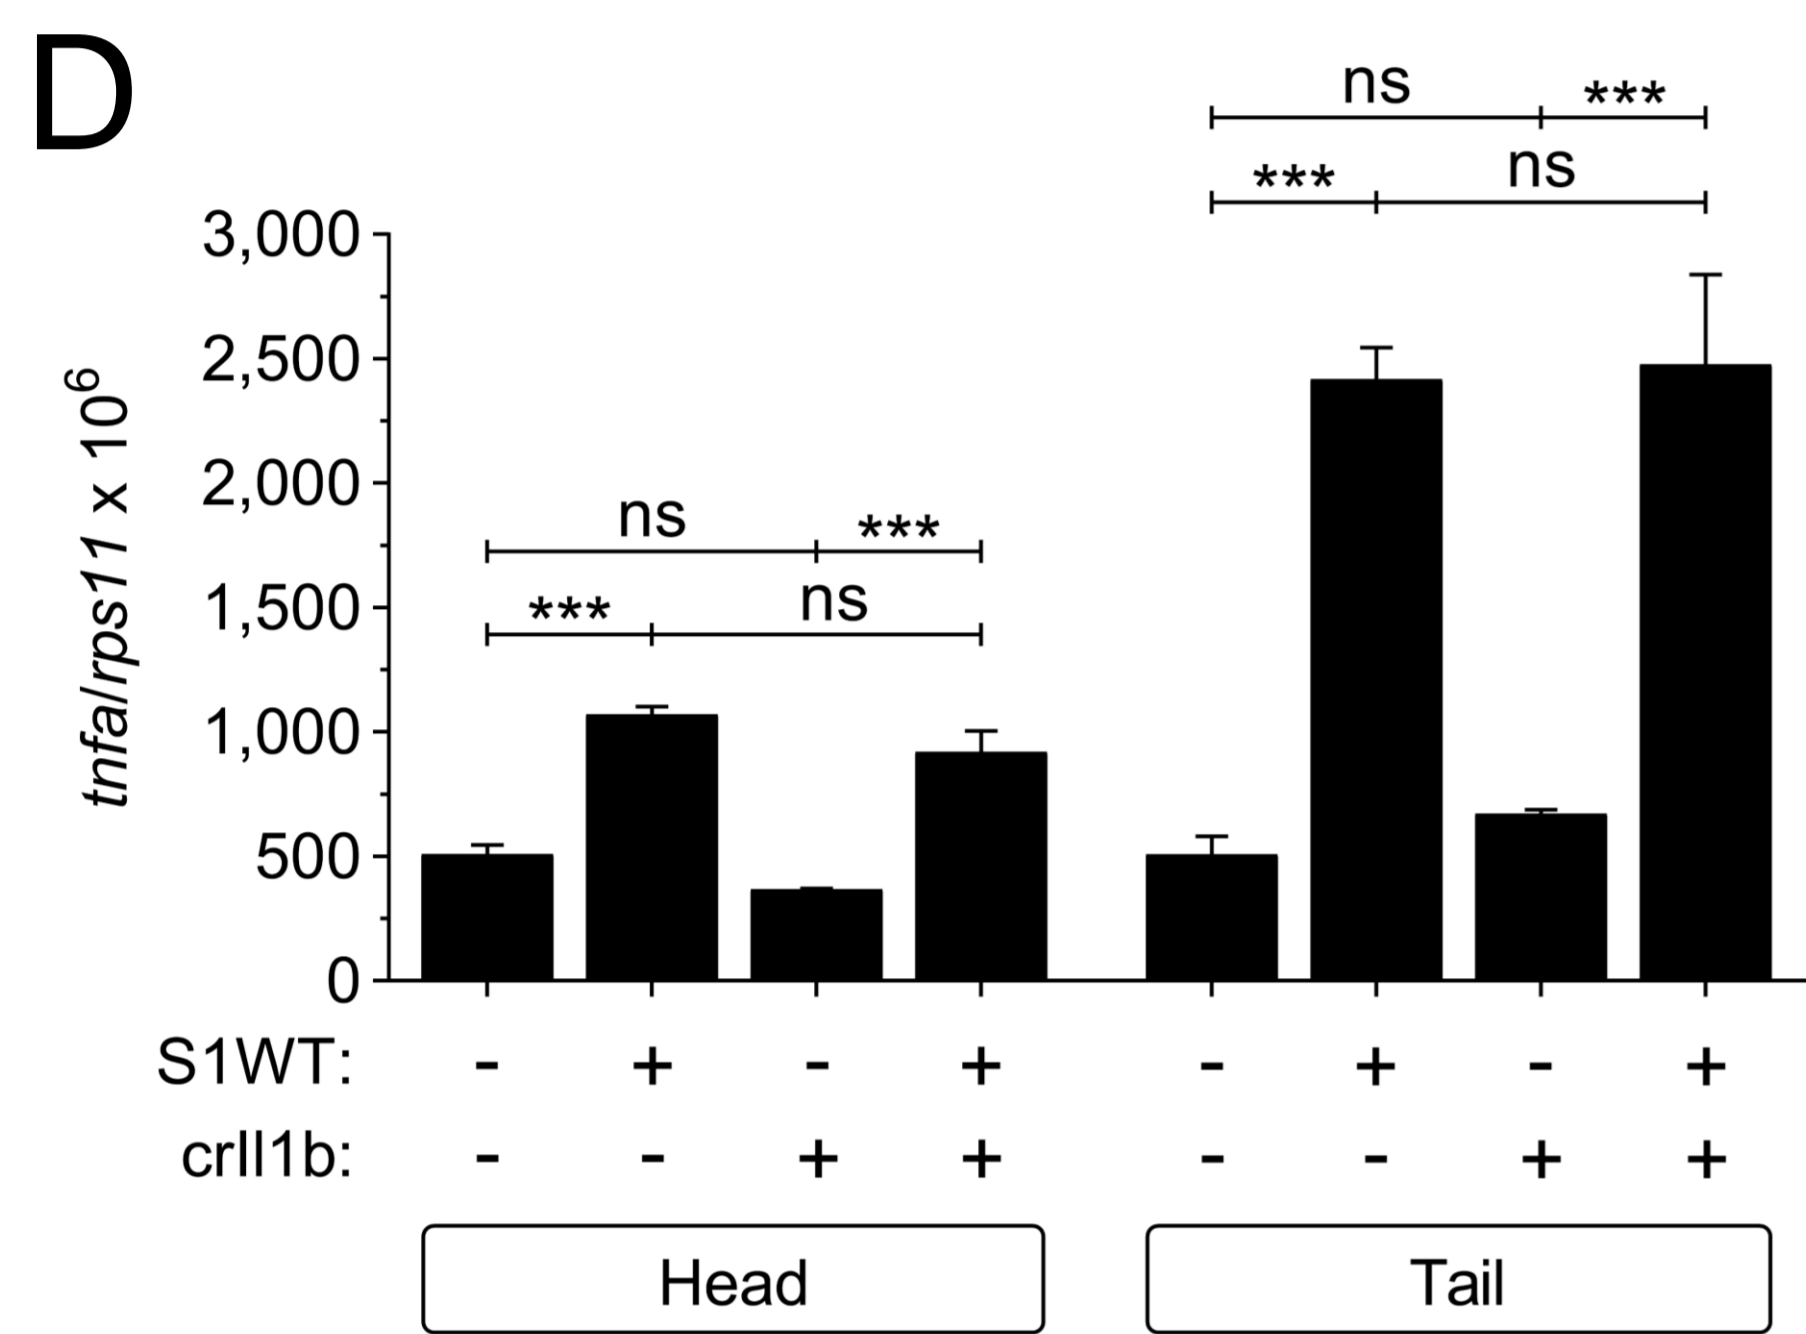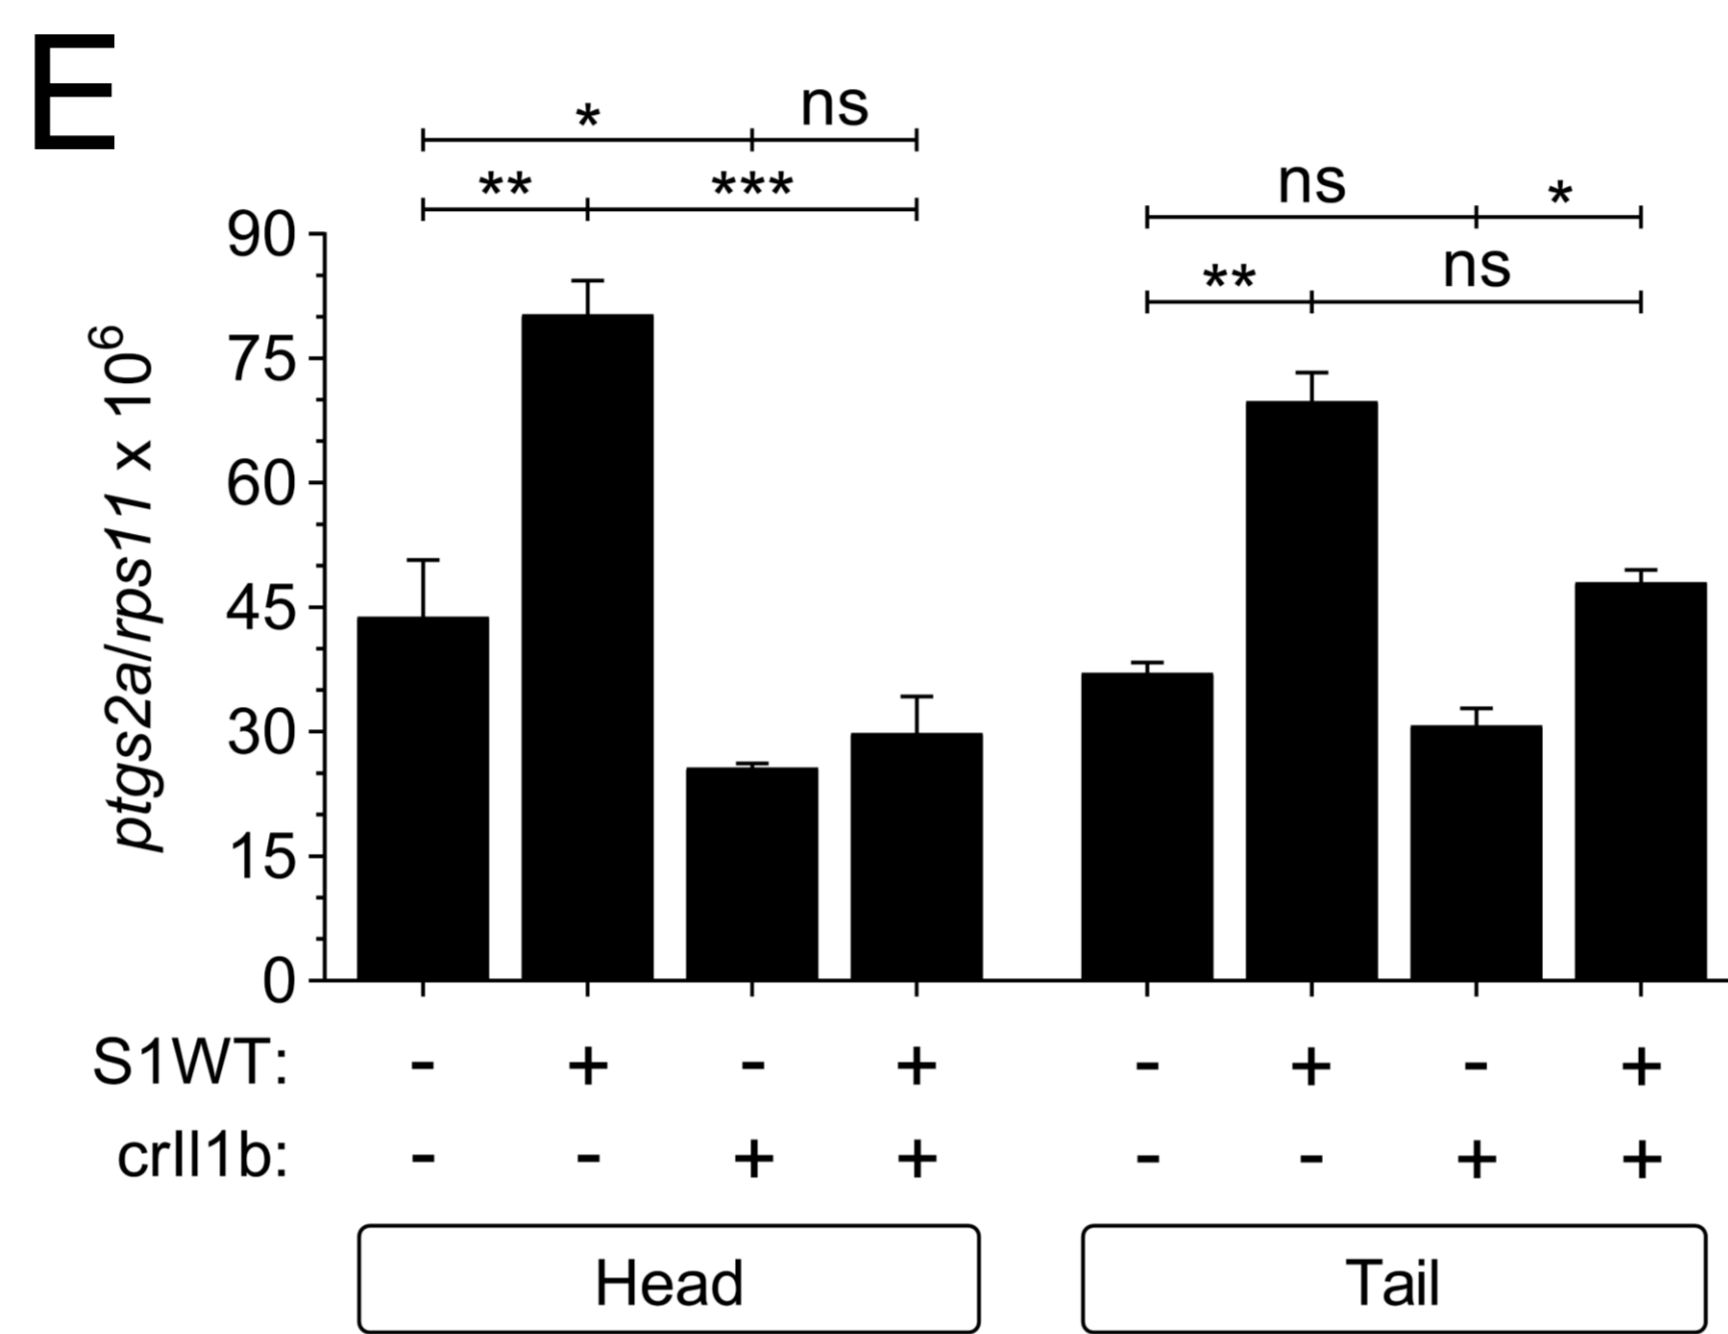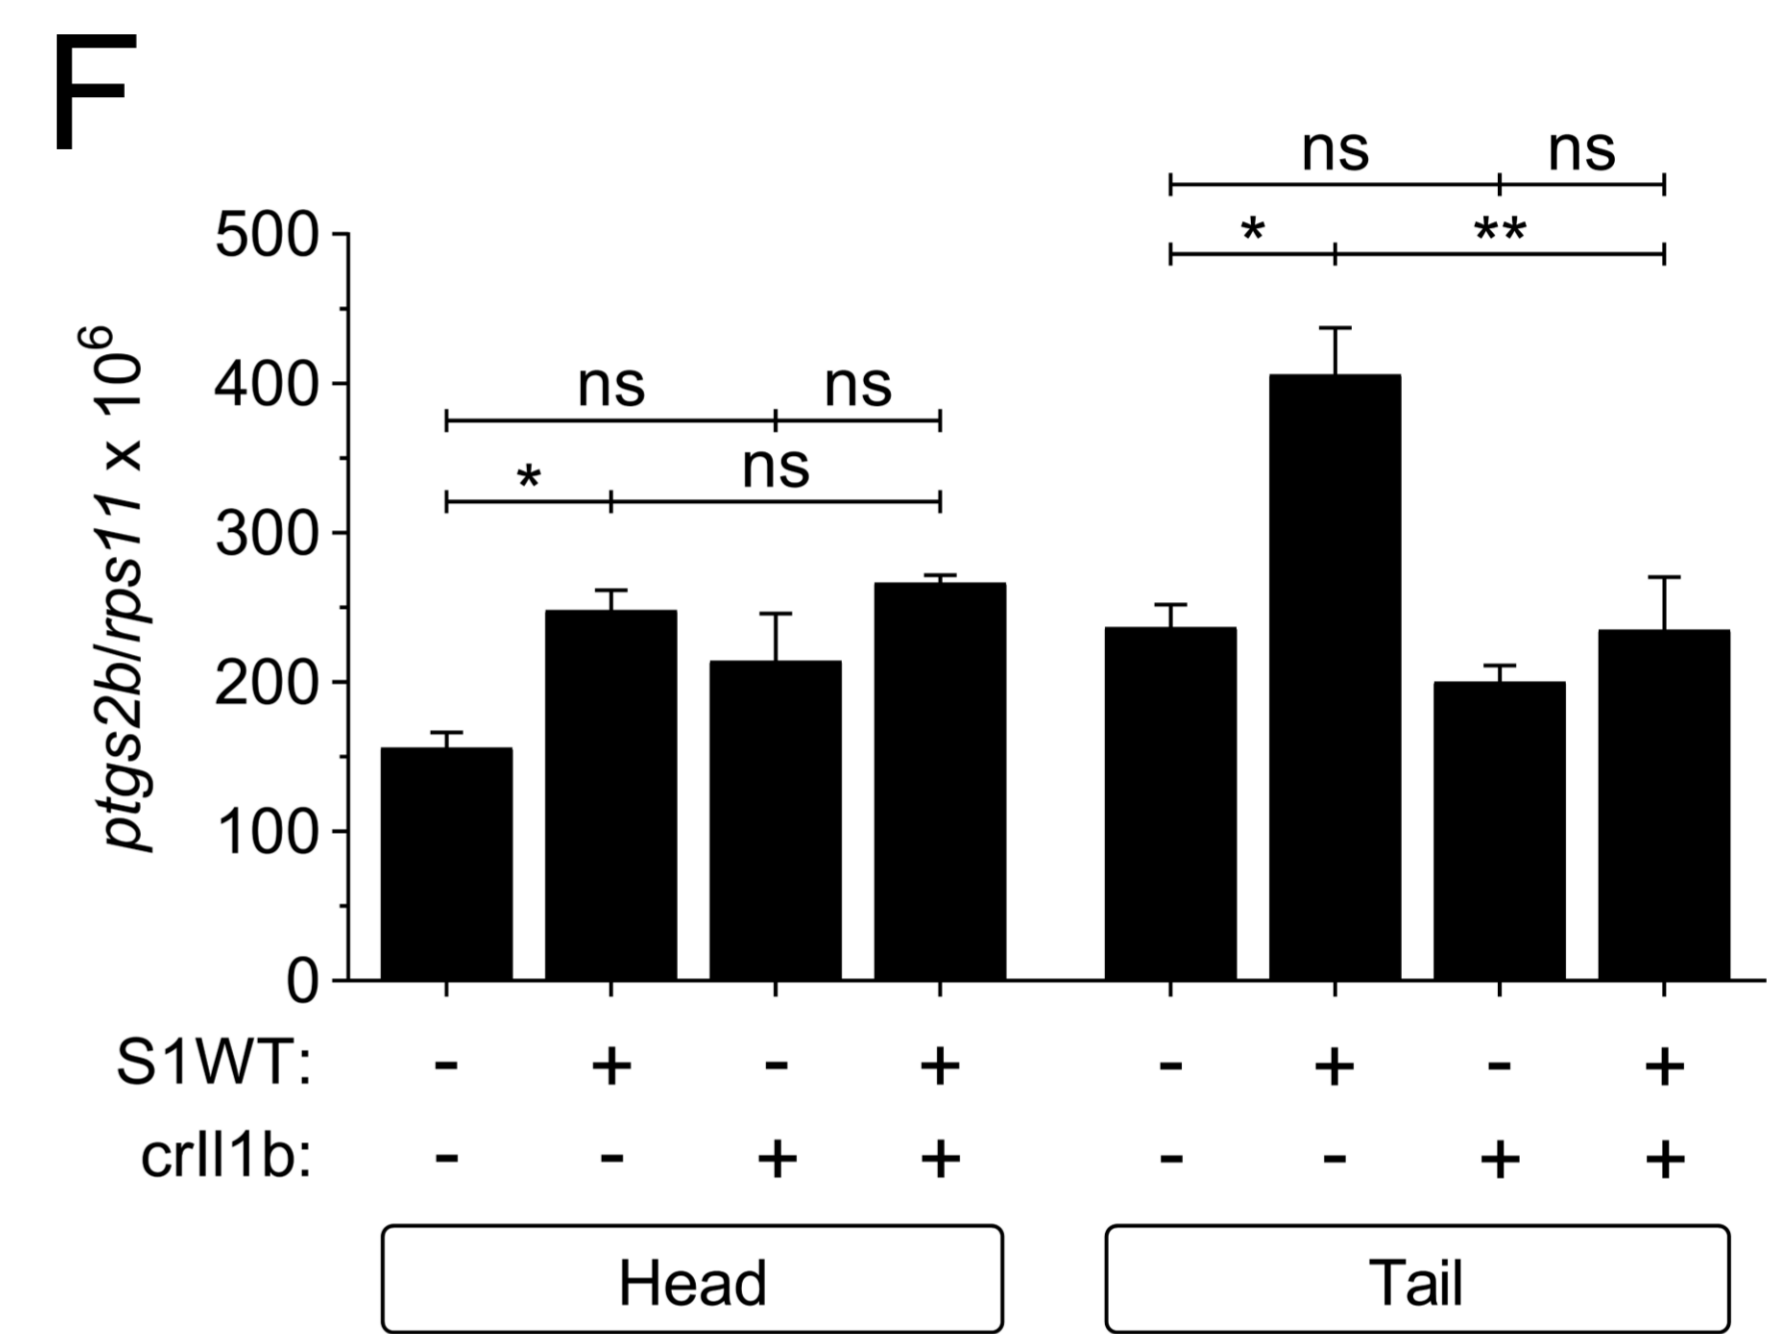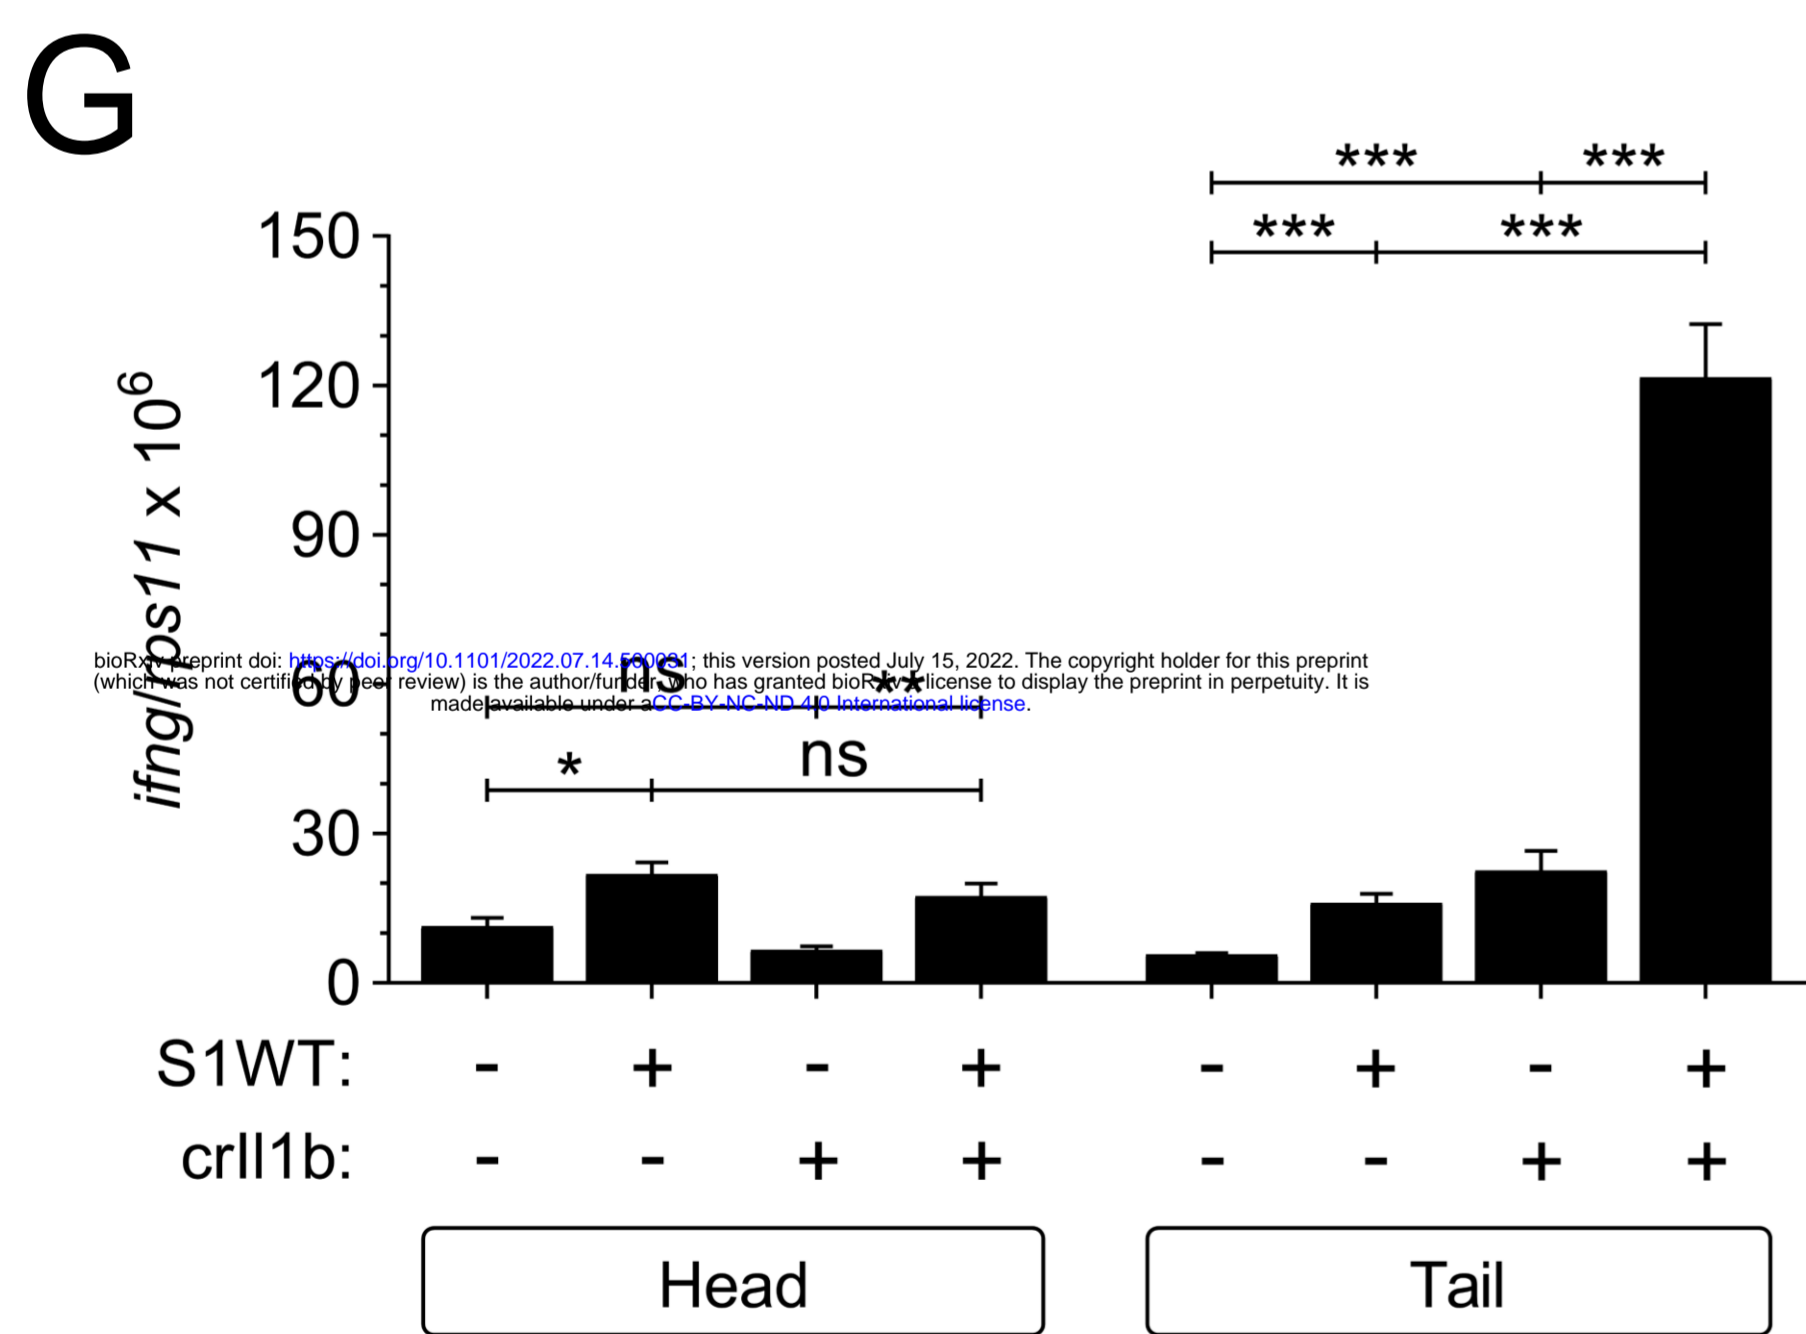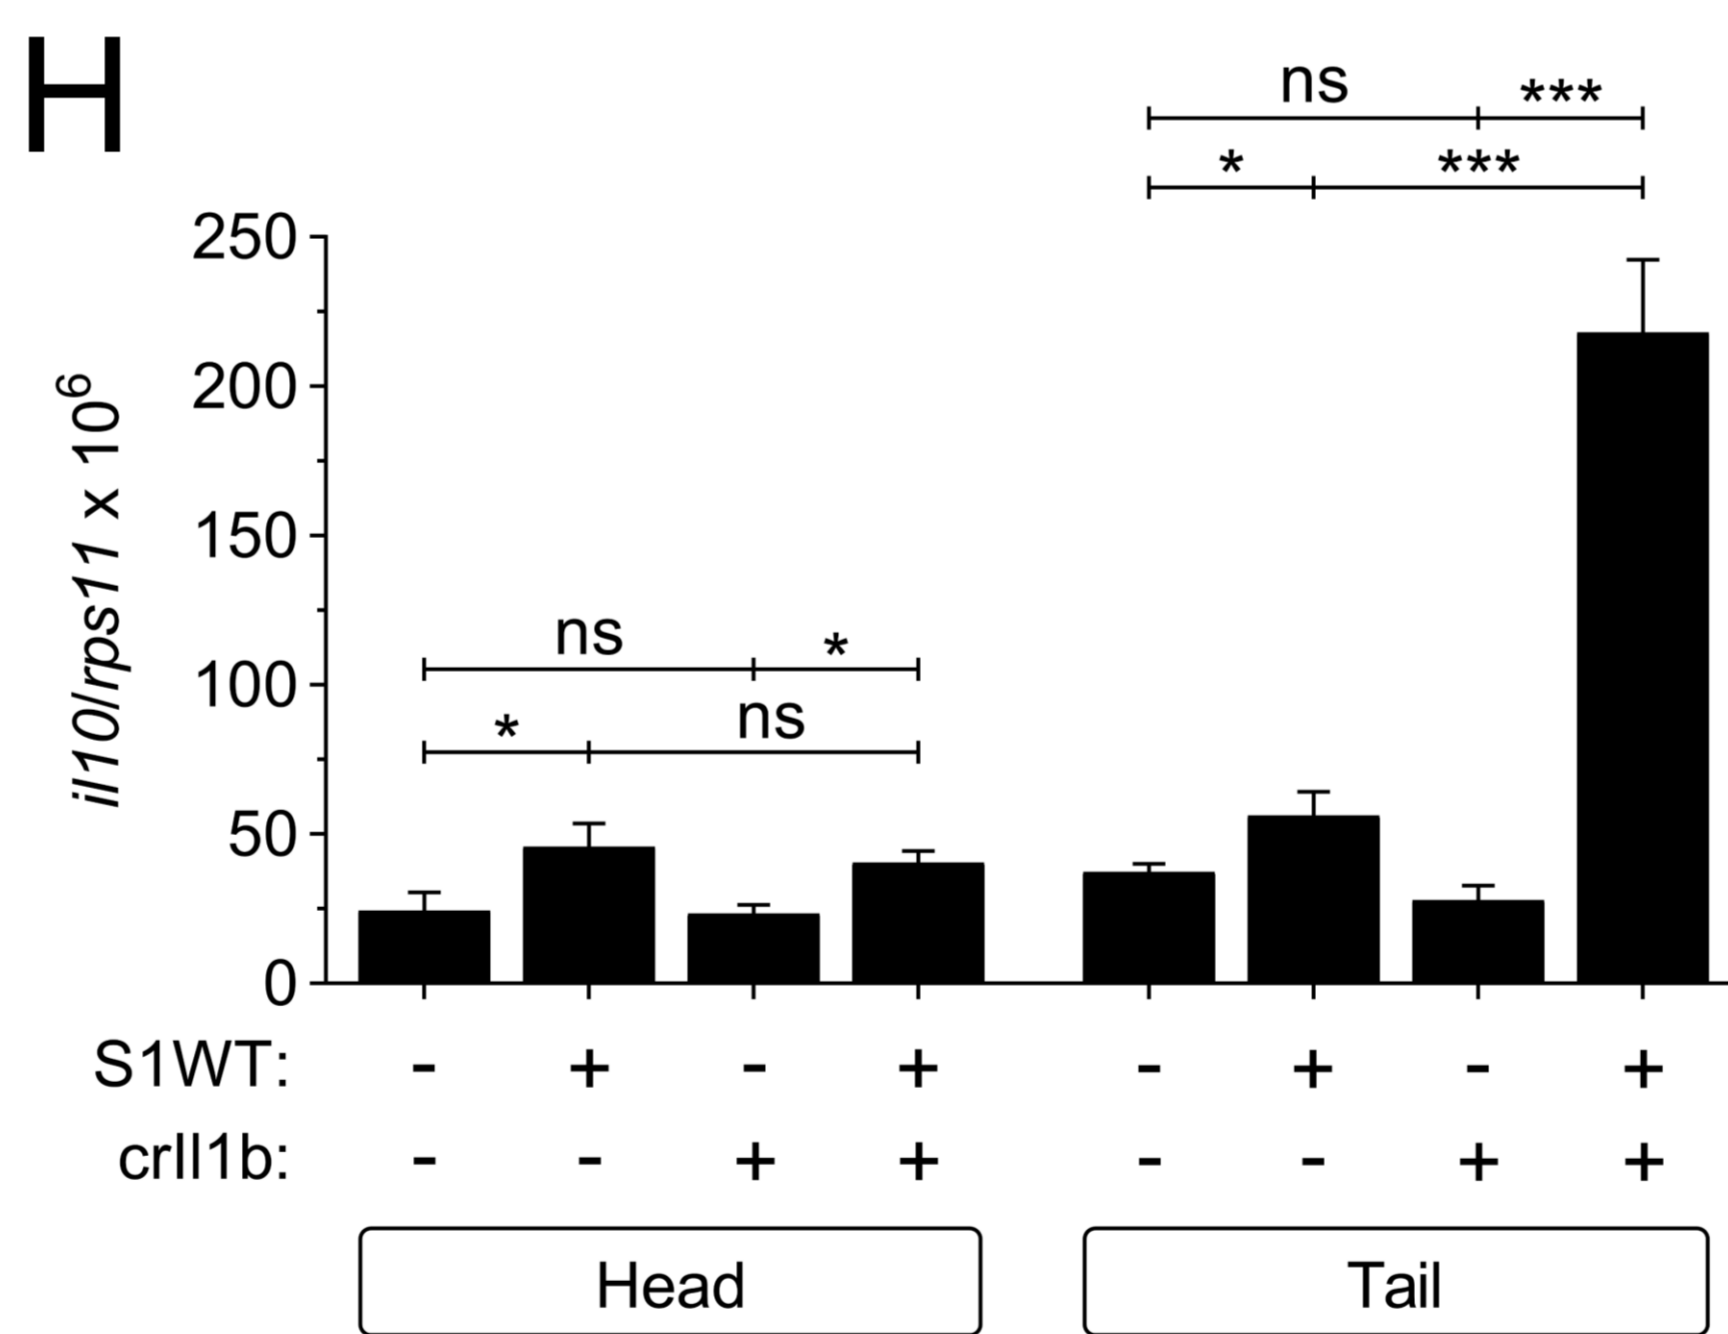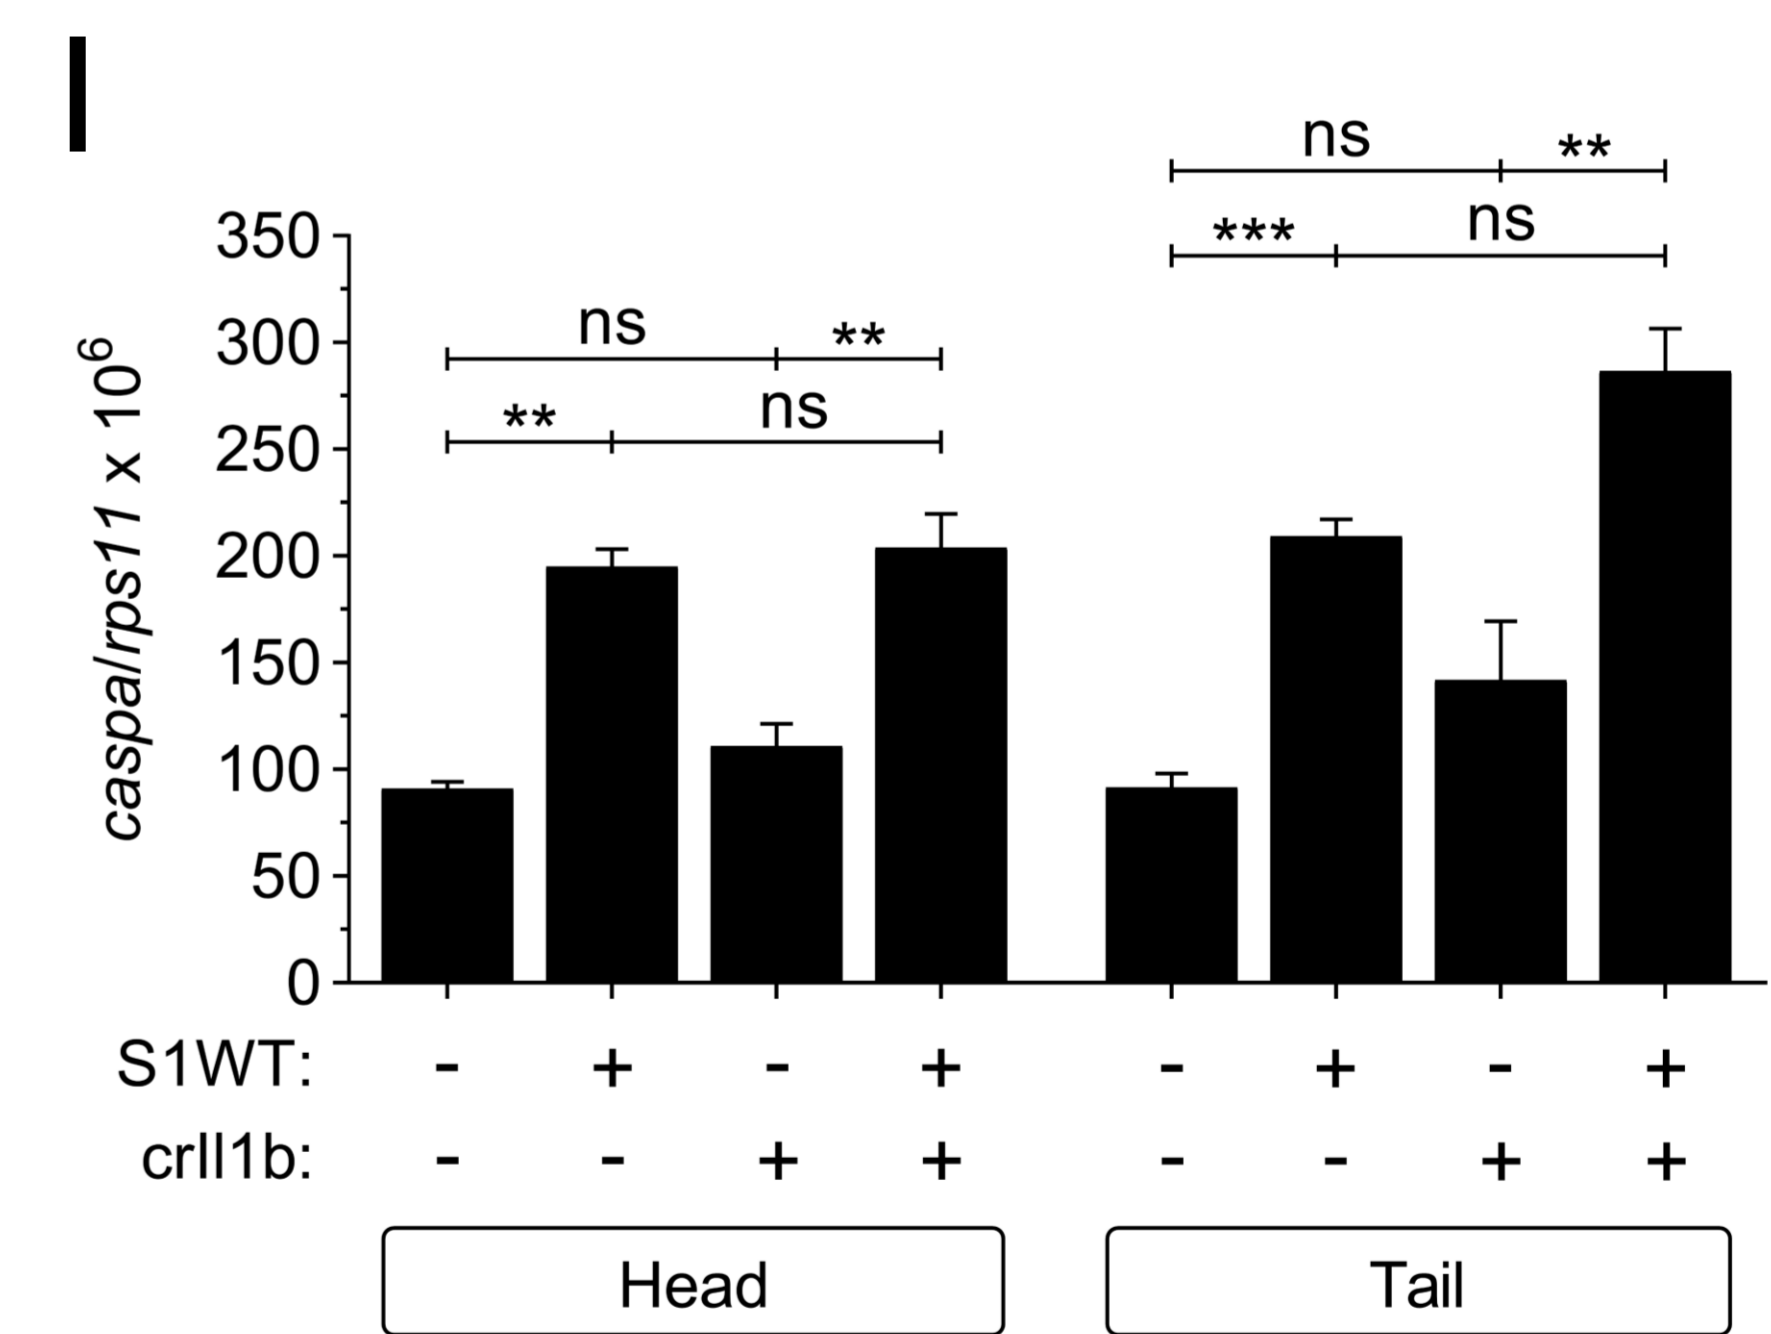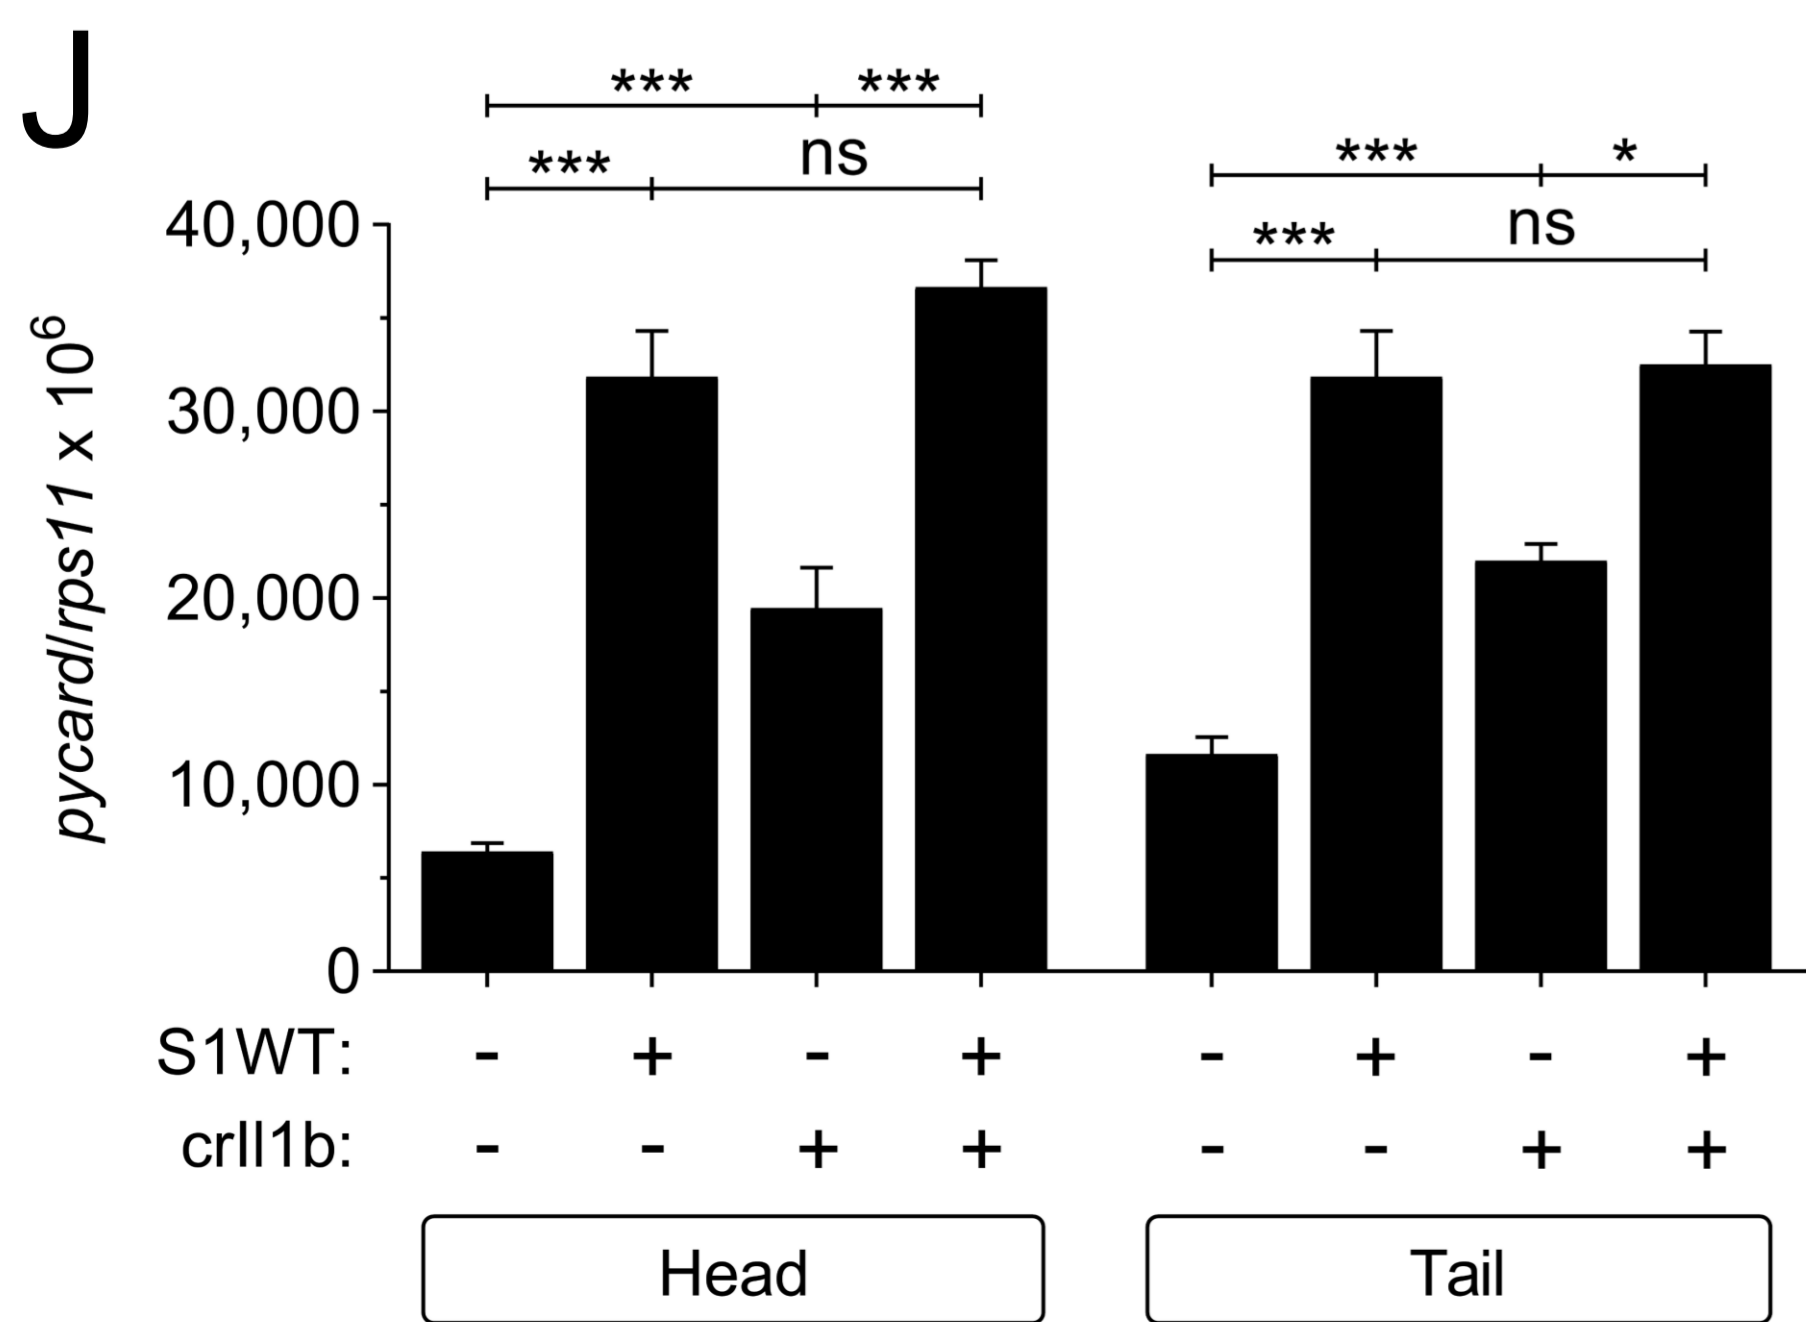

# Figure S5

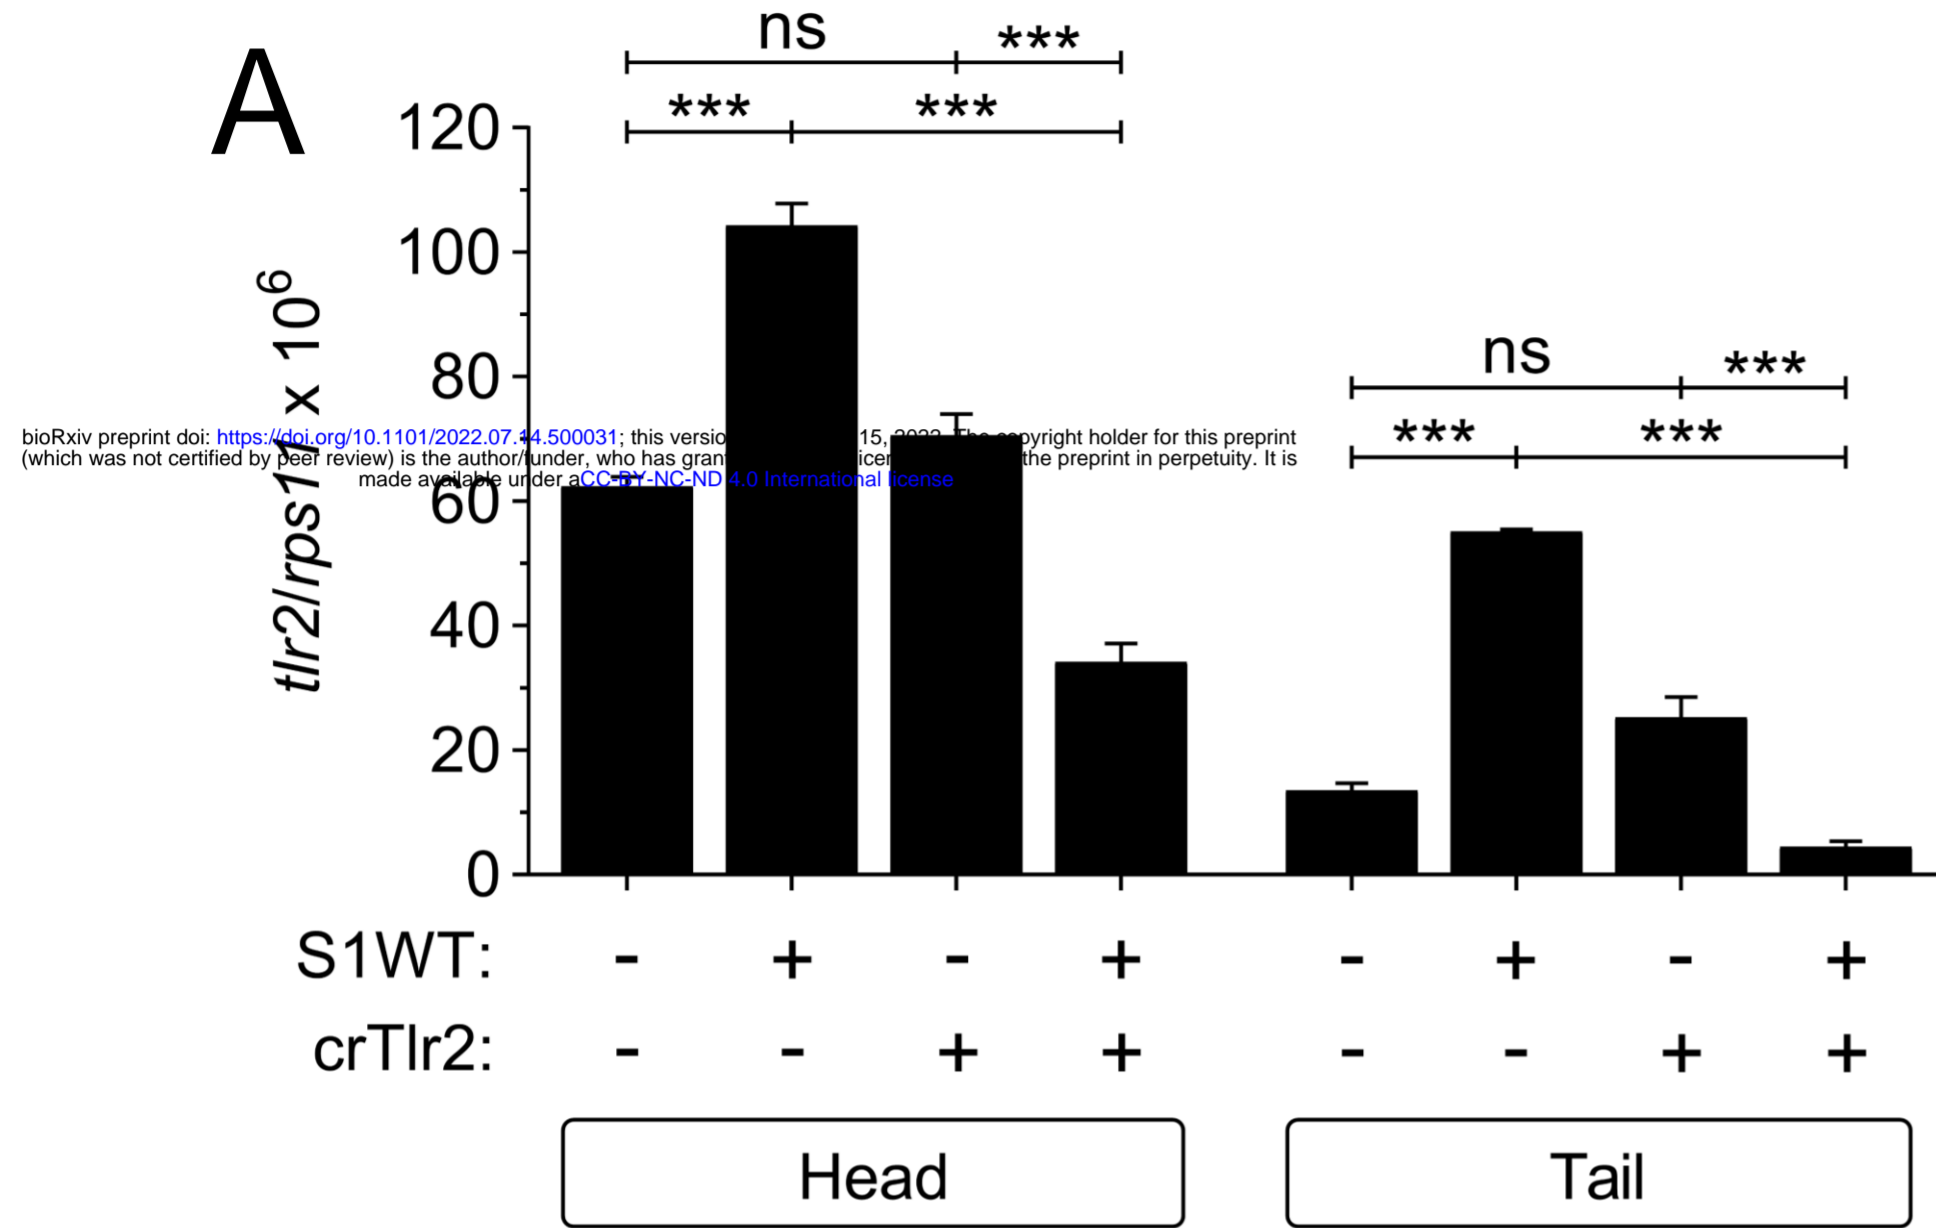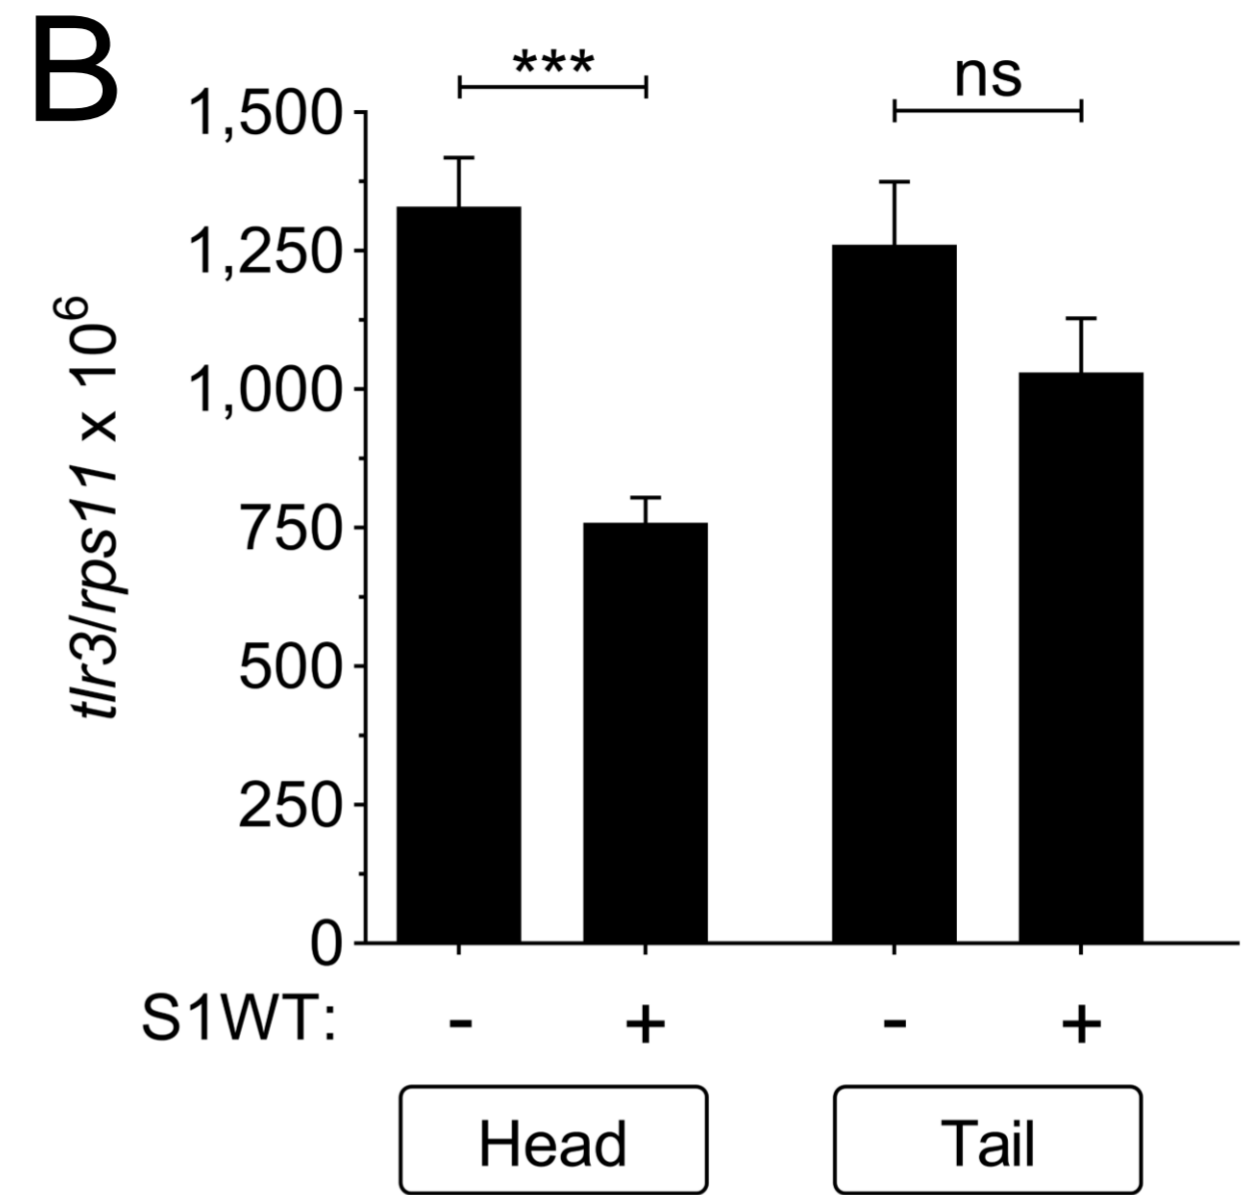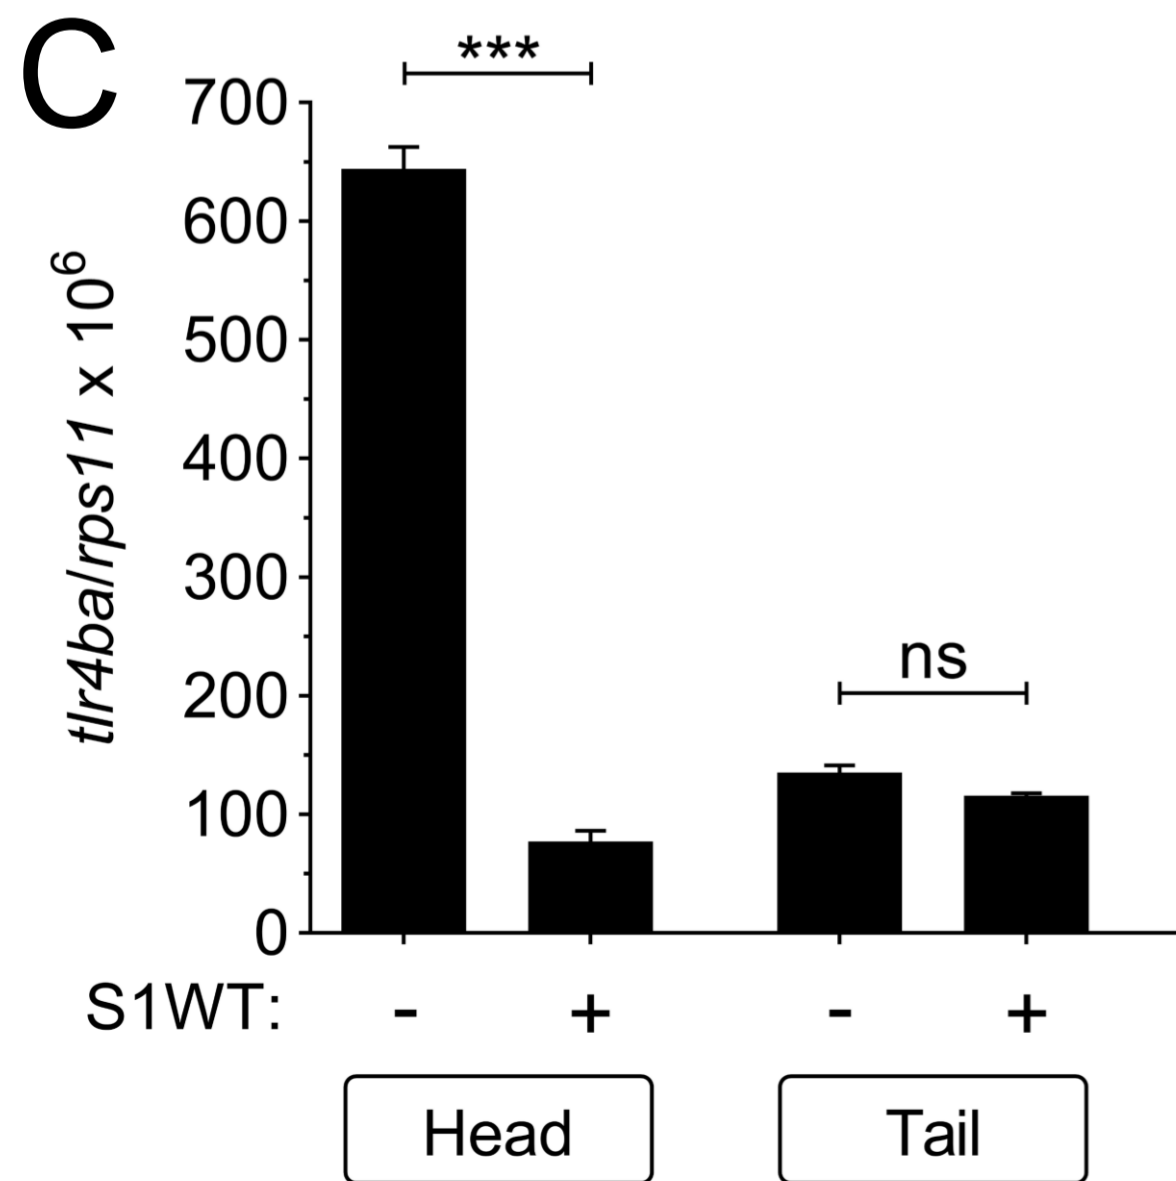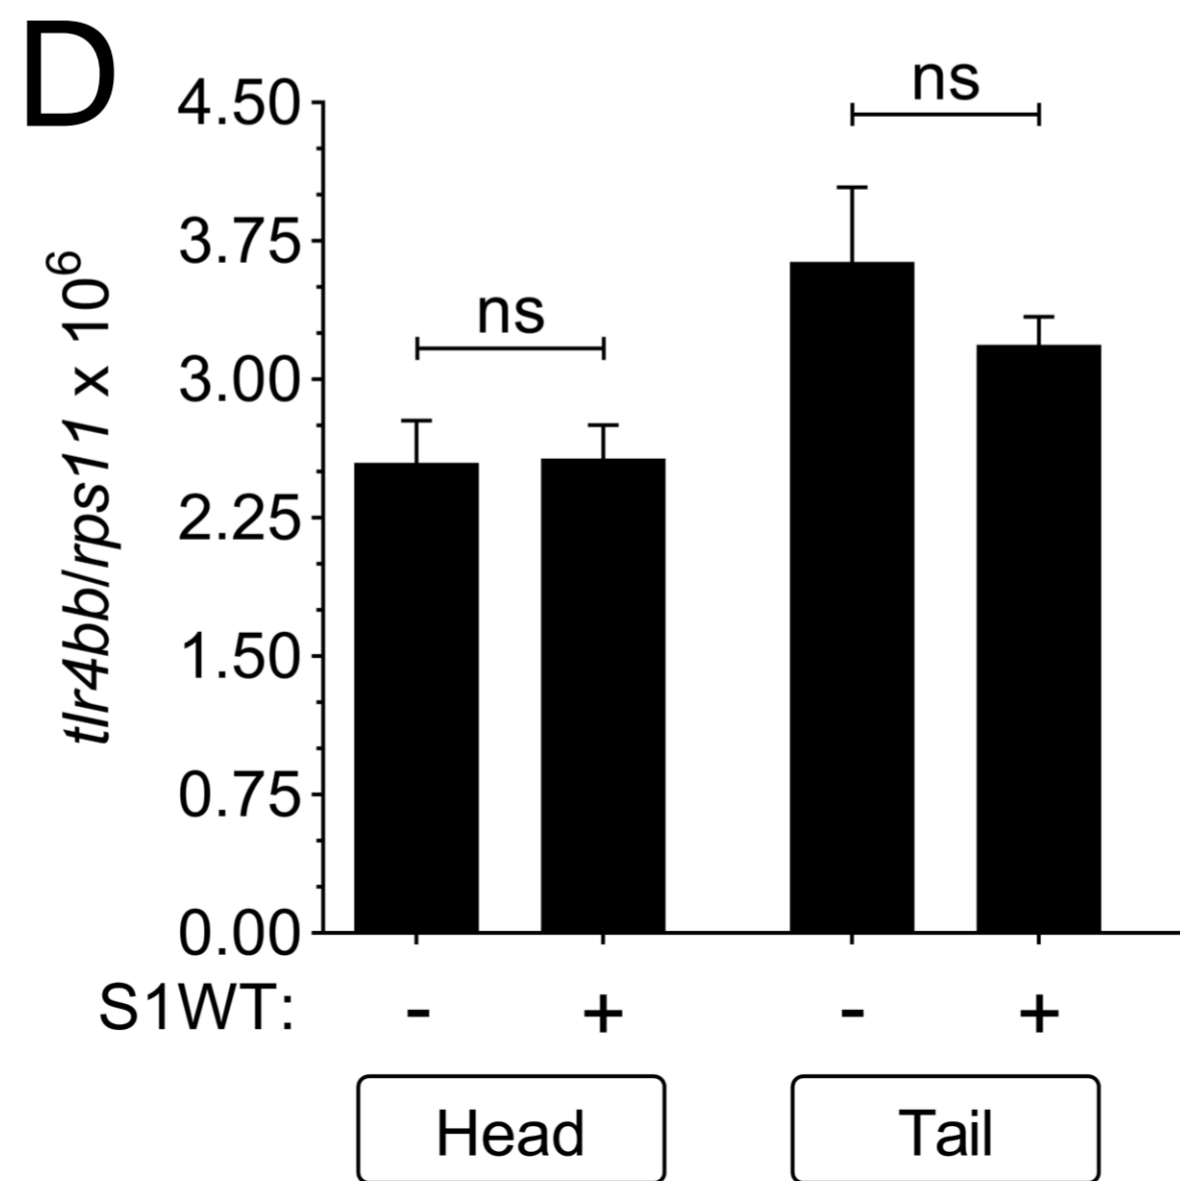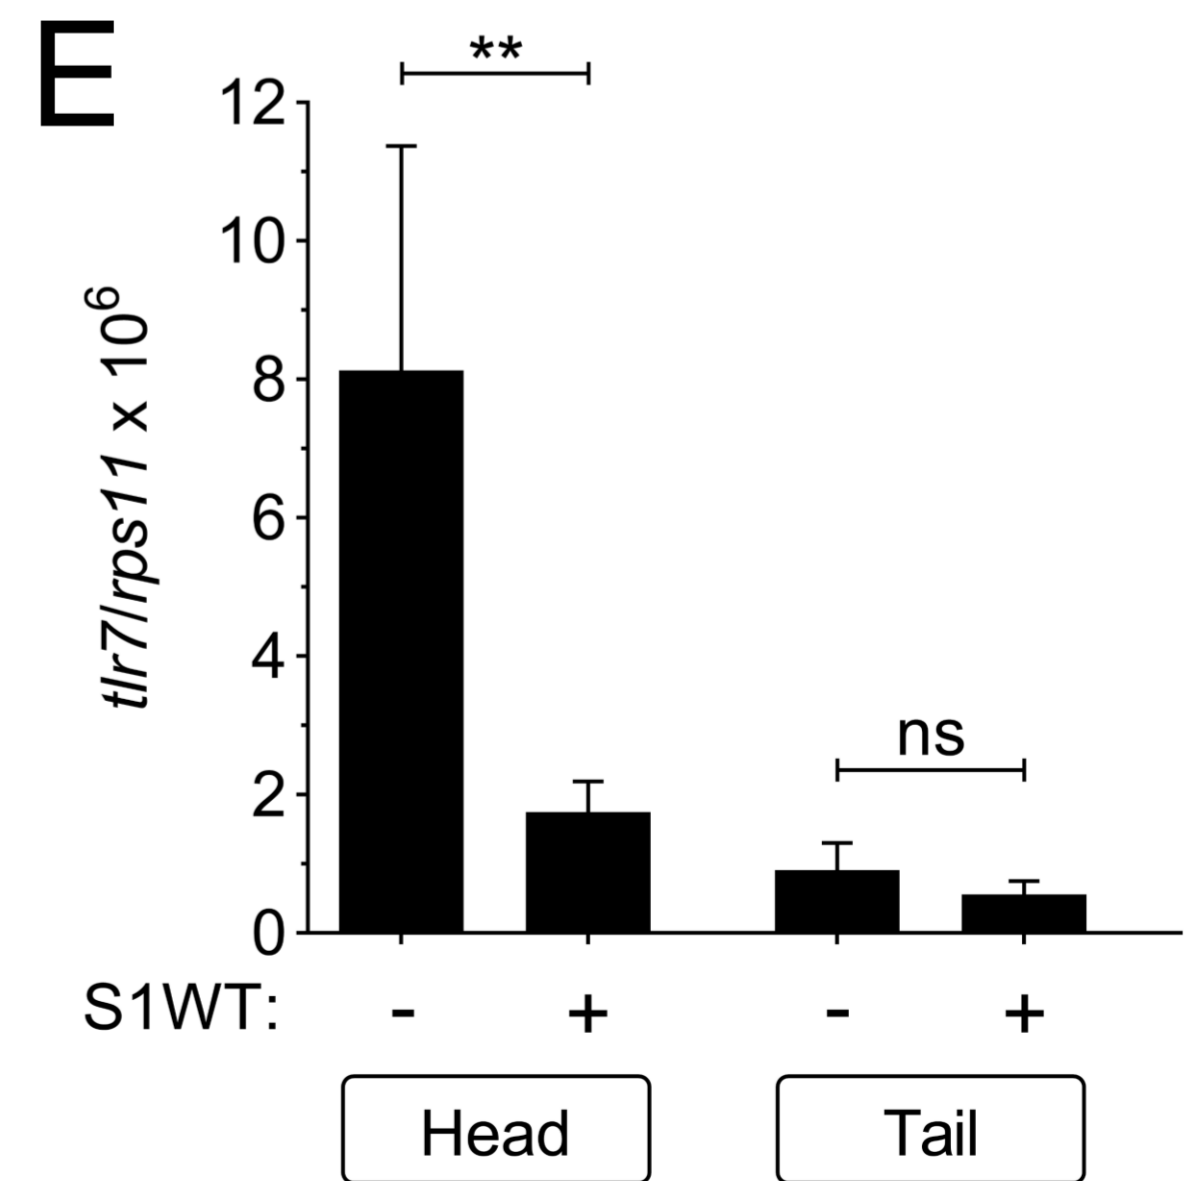



# Figure S6

**A**

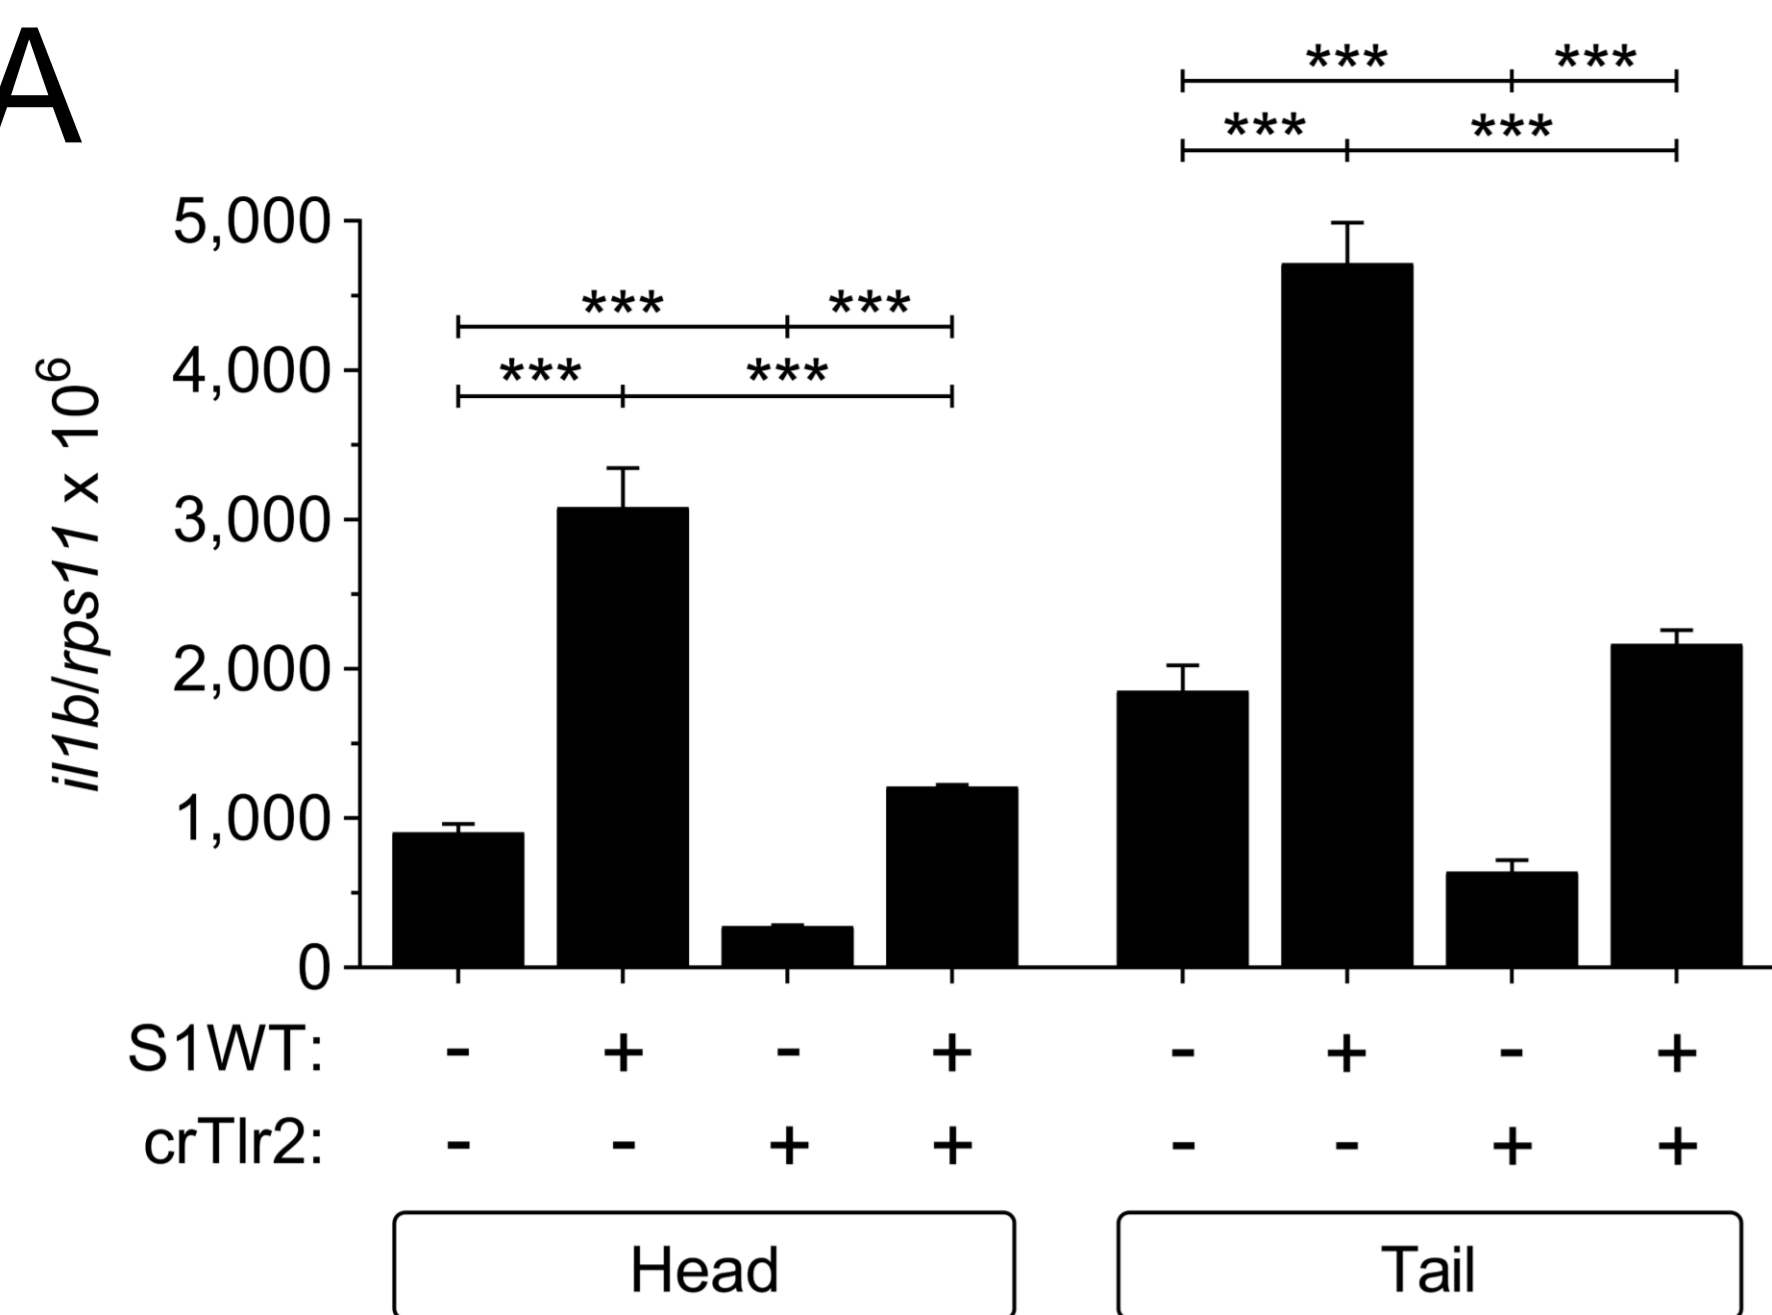

**B**

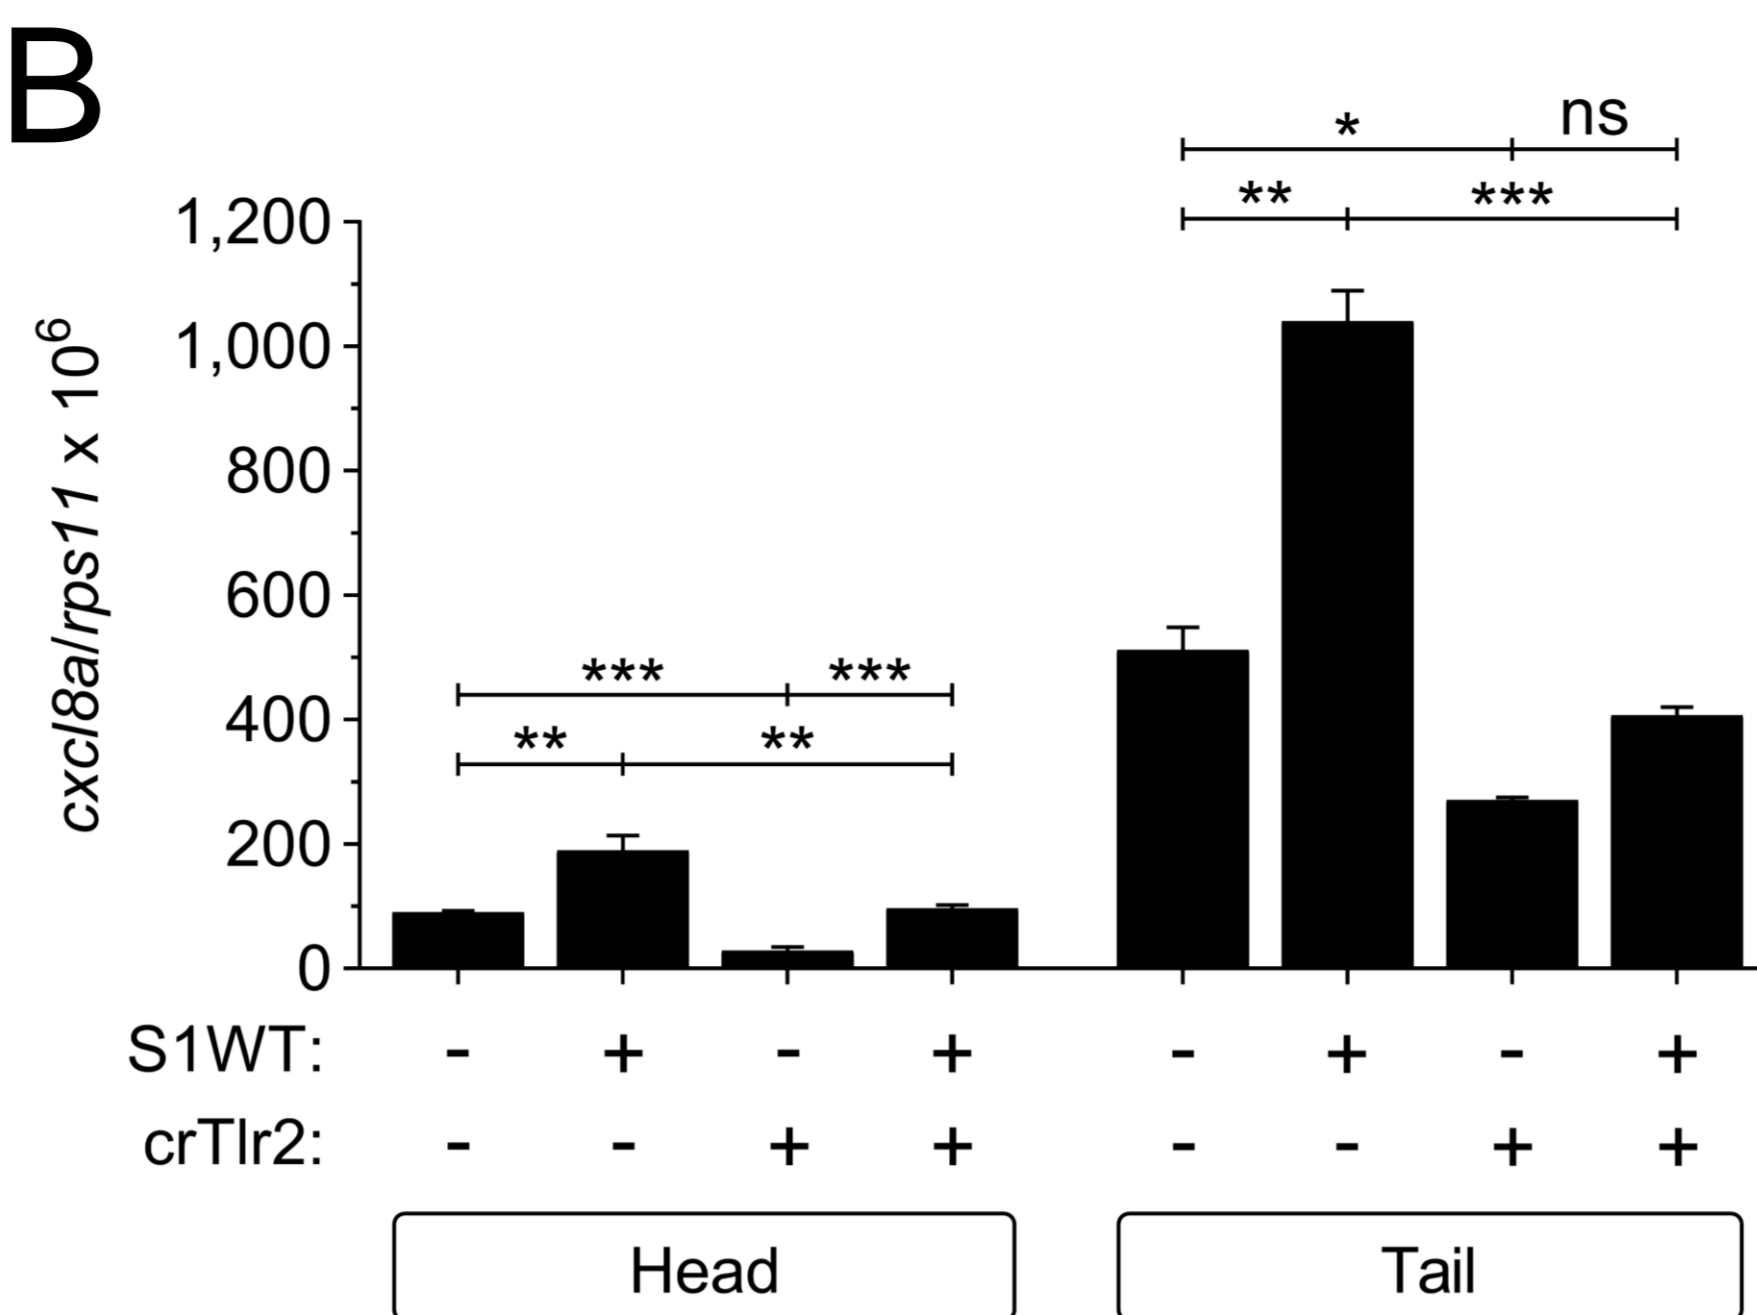

**C**

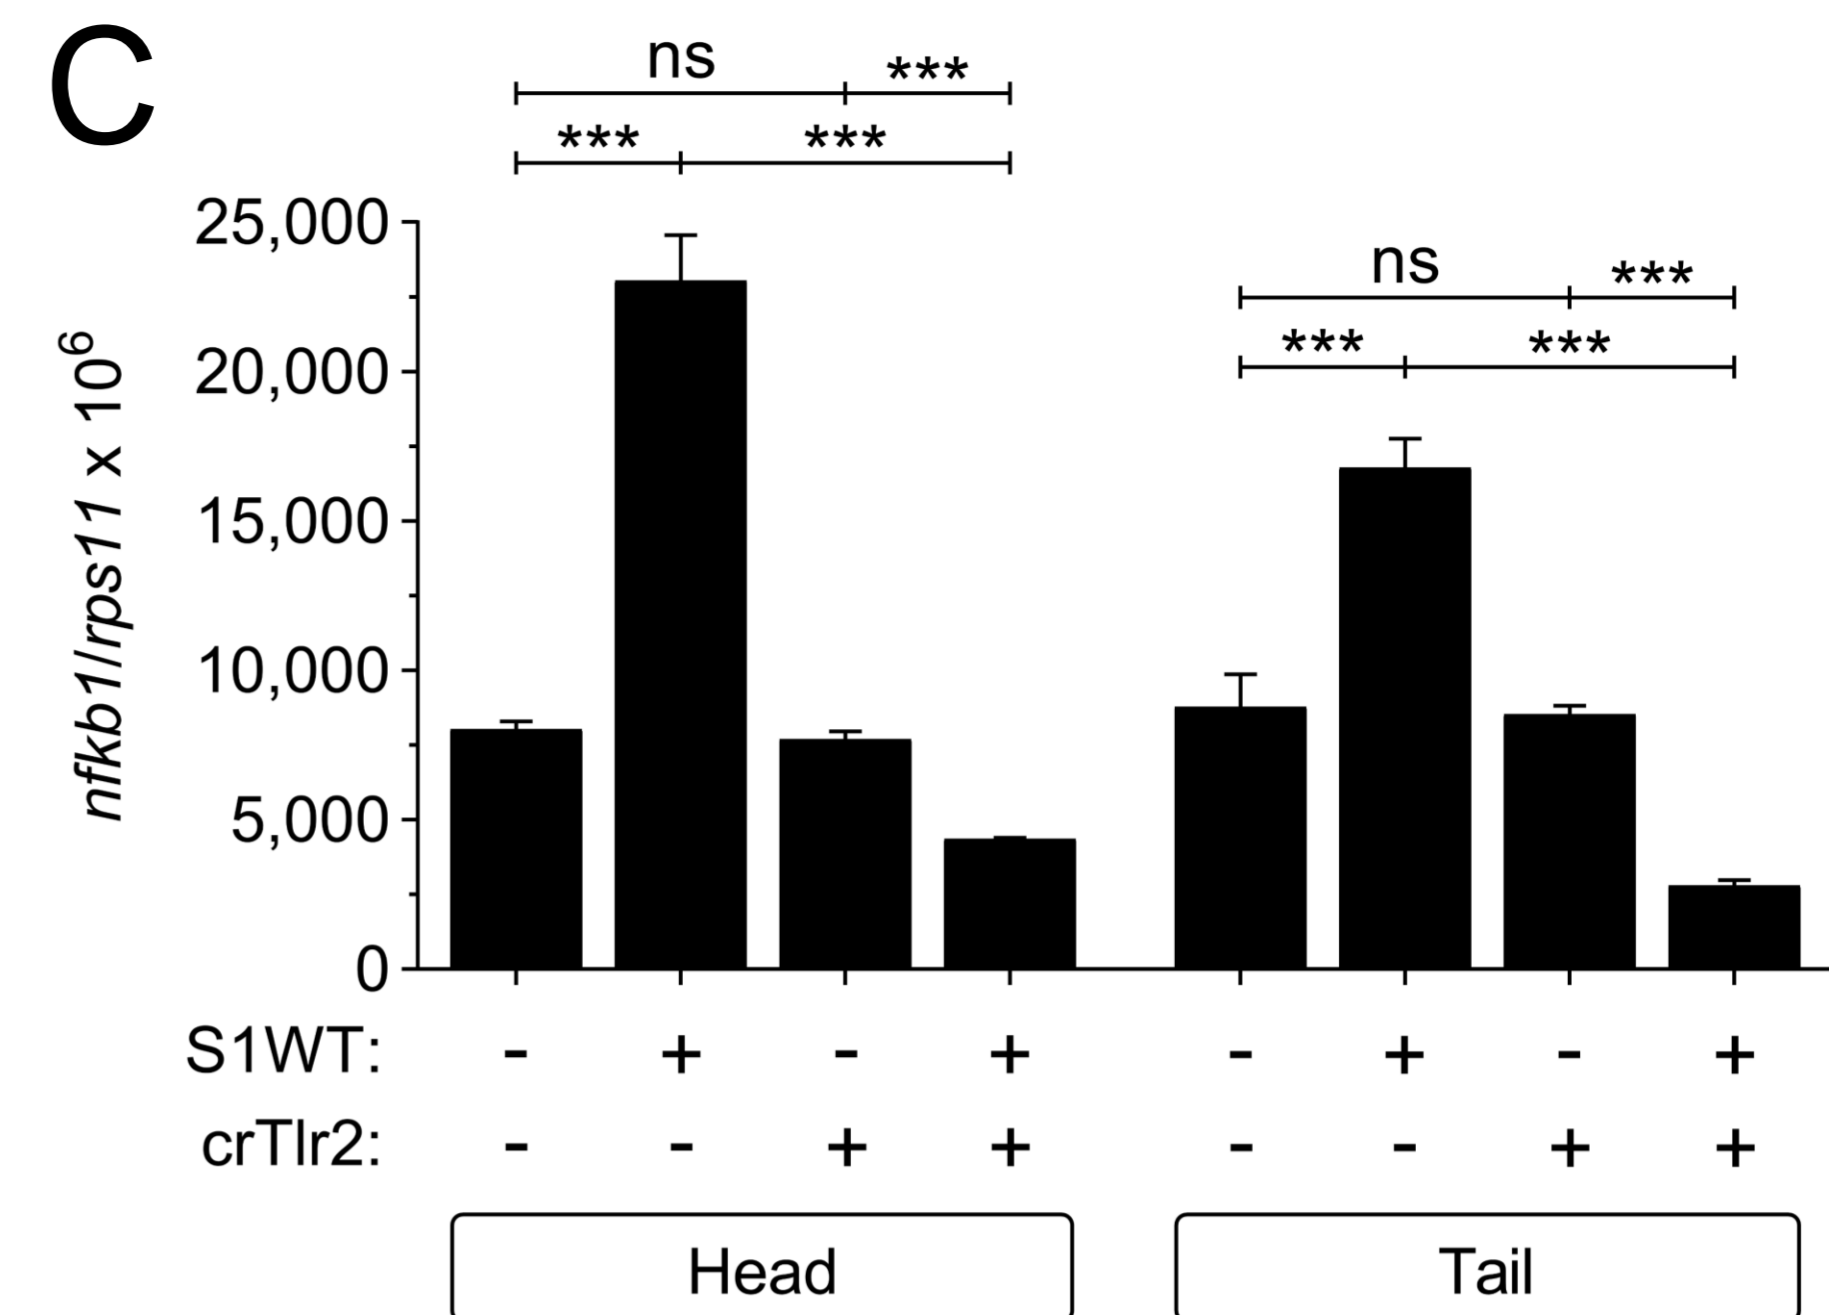

**D**

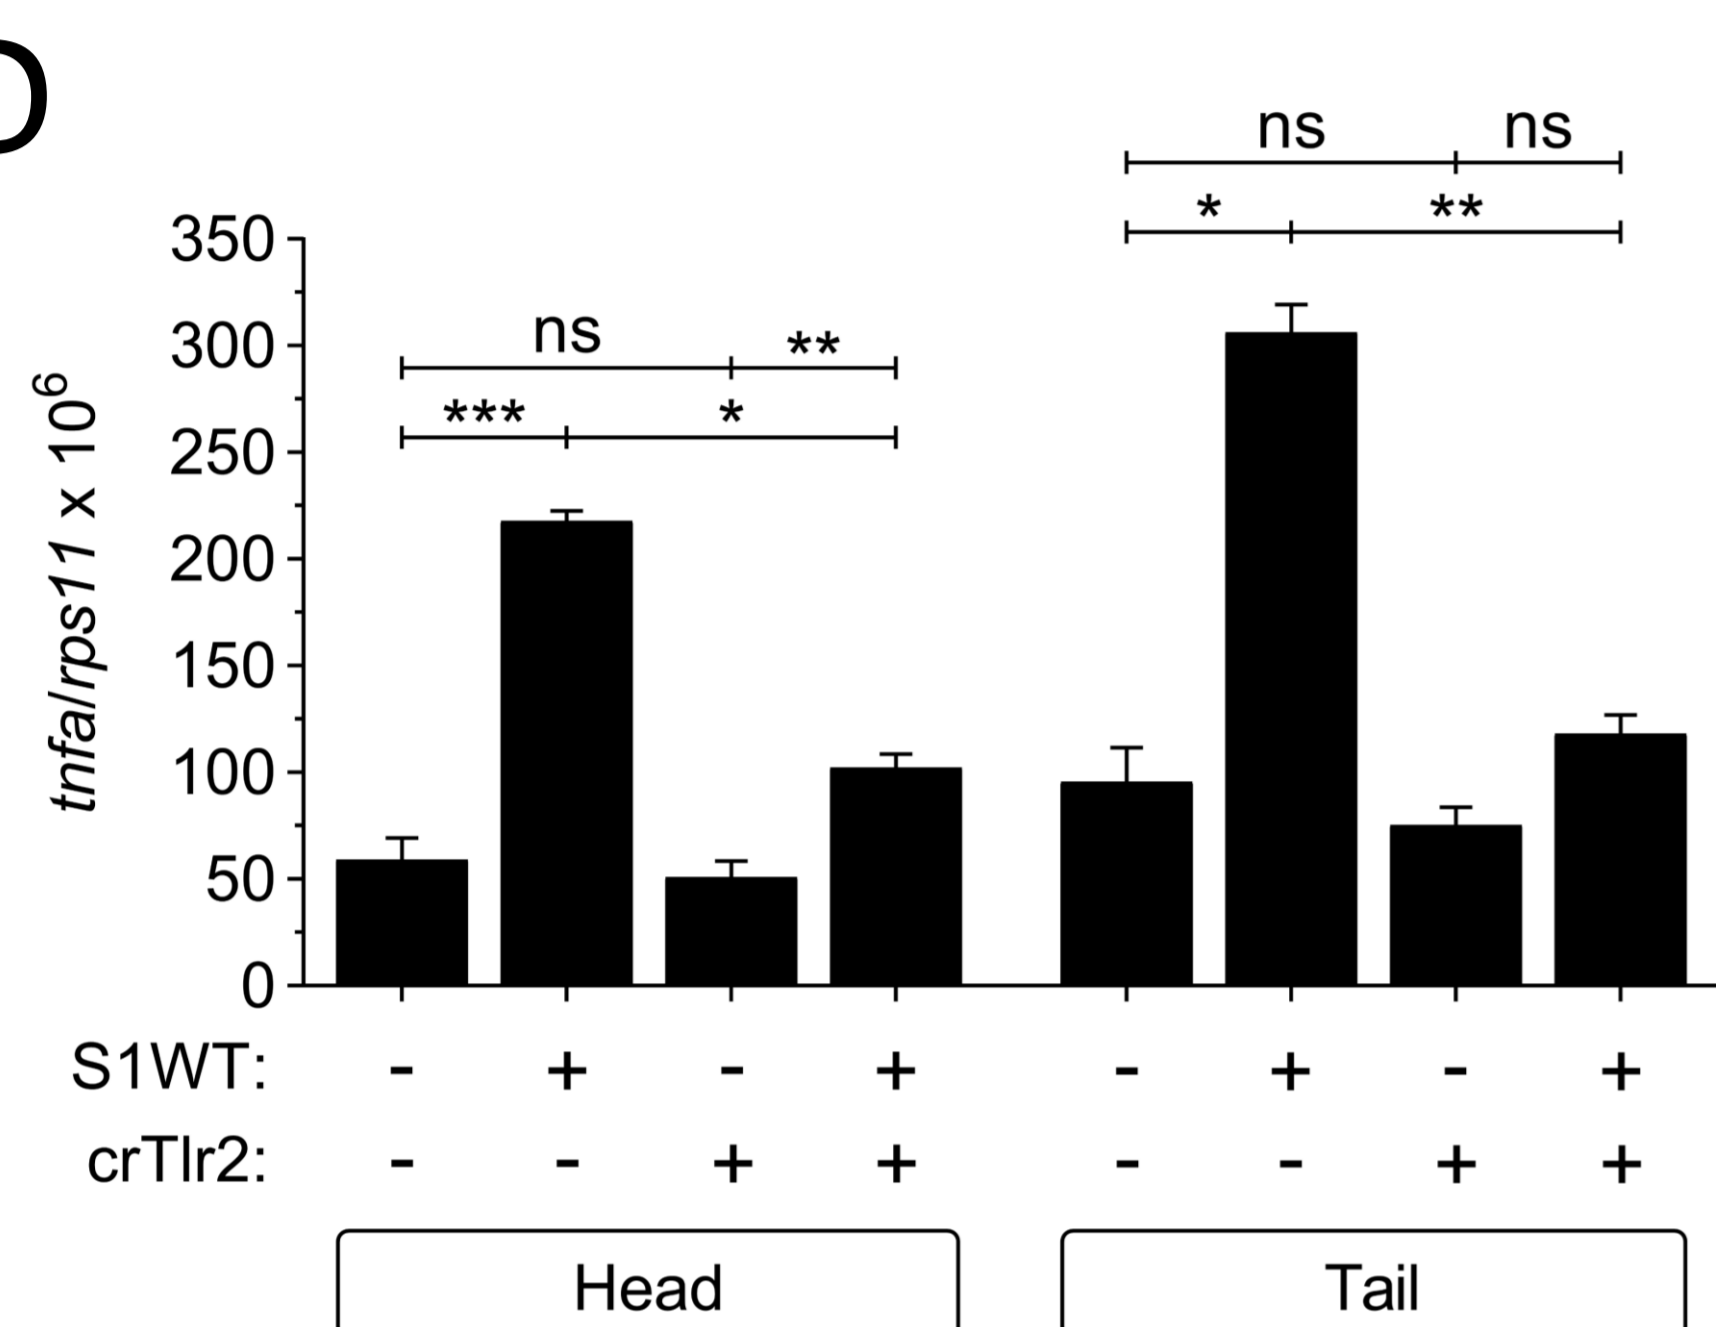

**E**

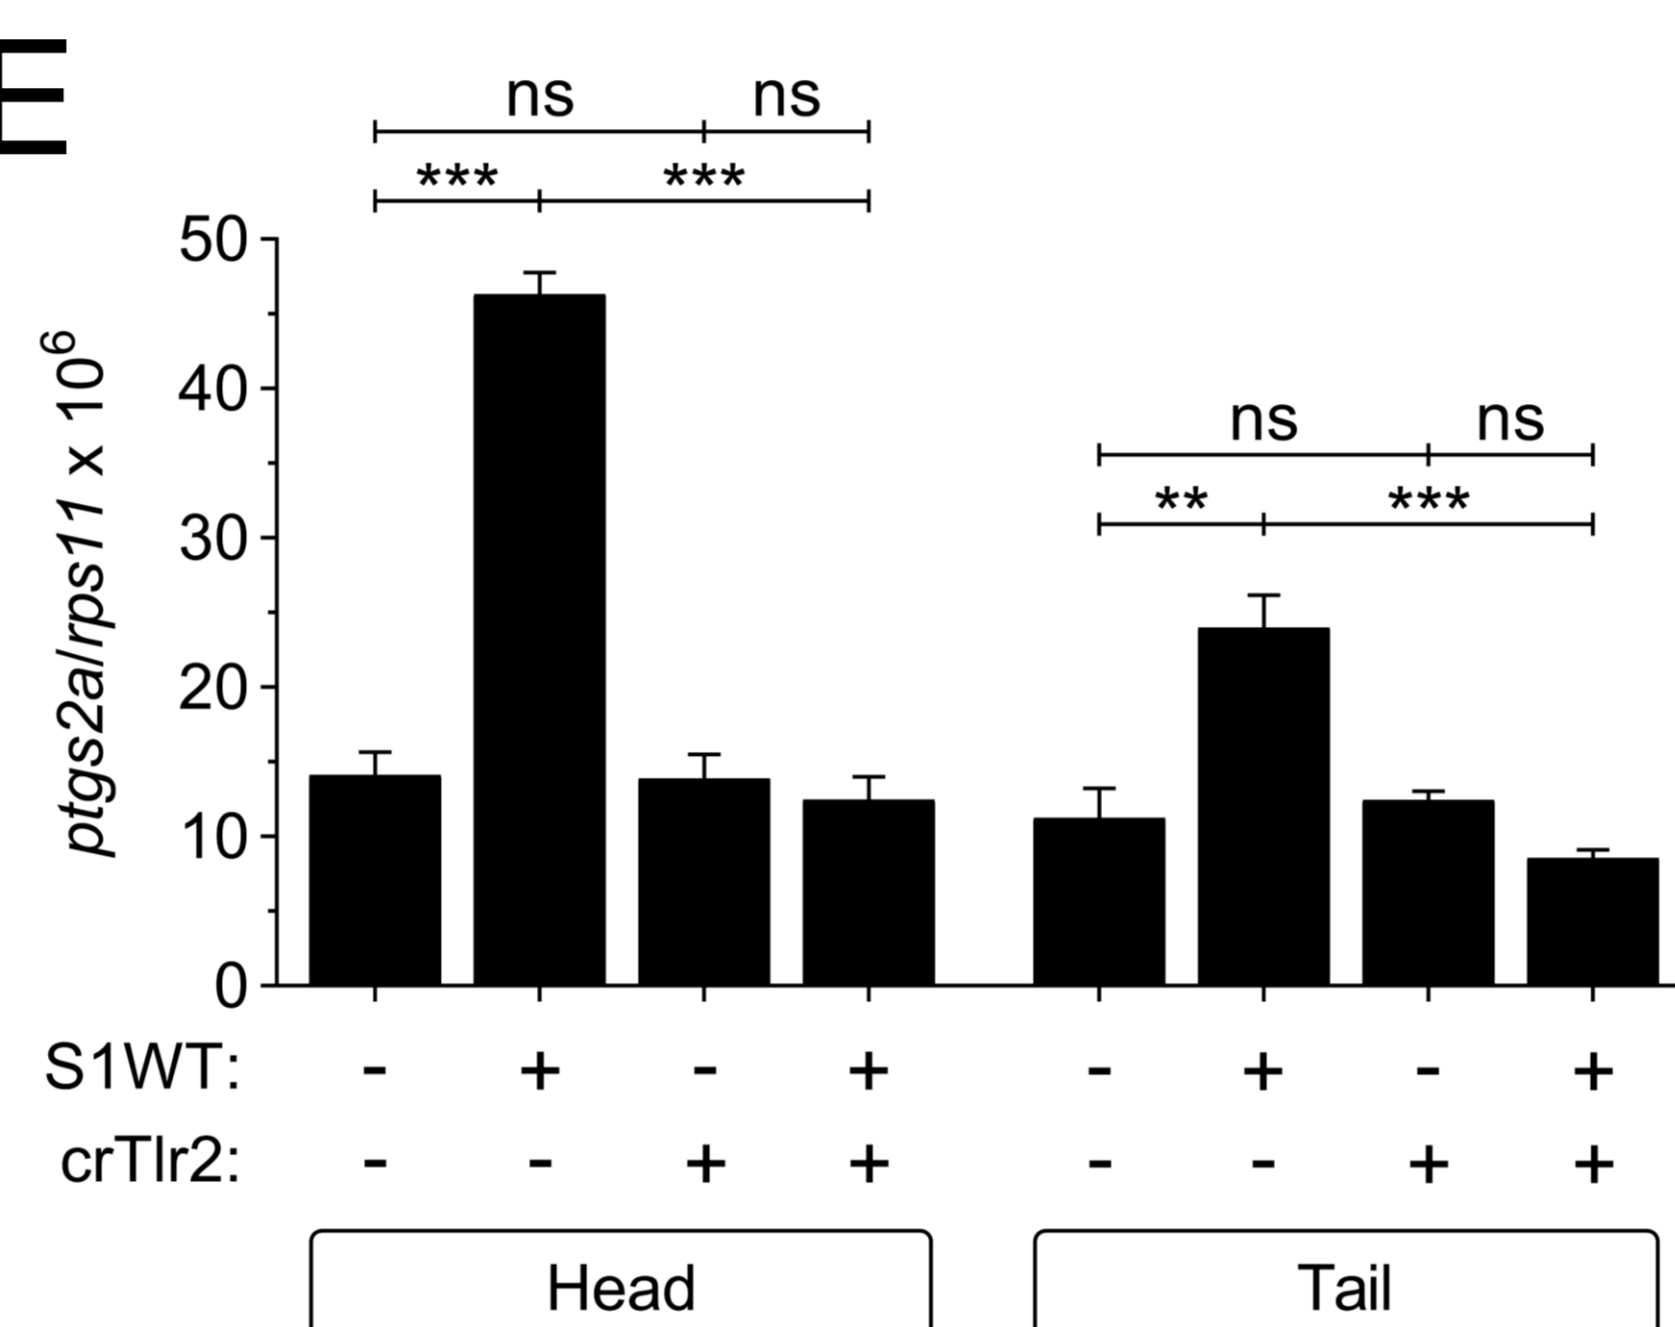

**F**

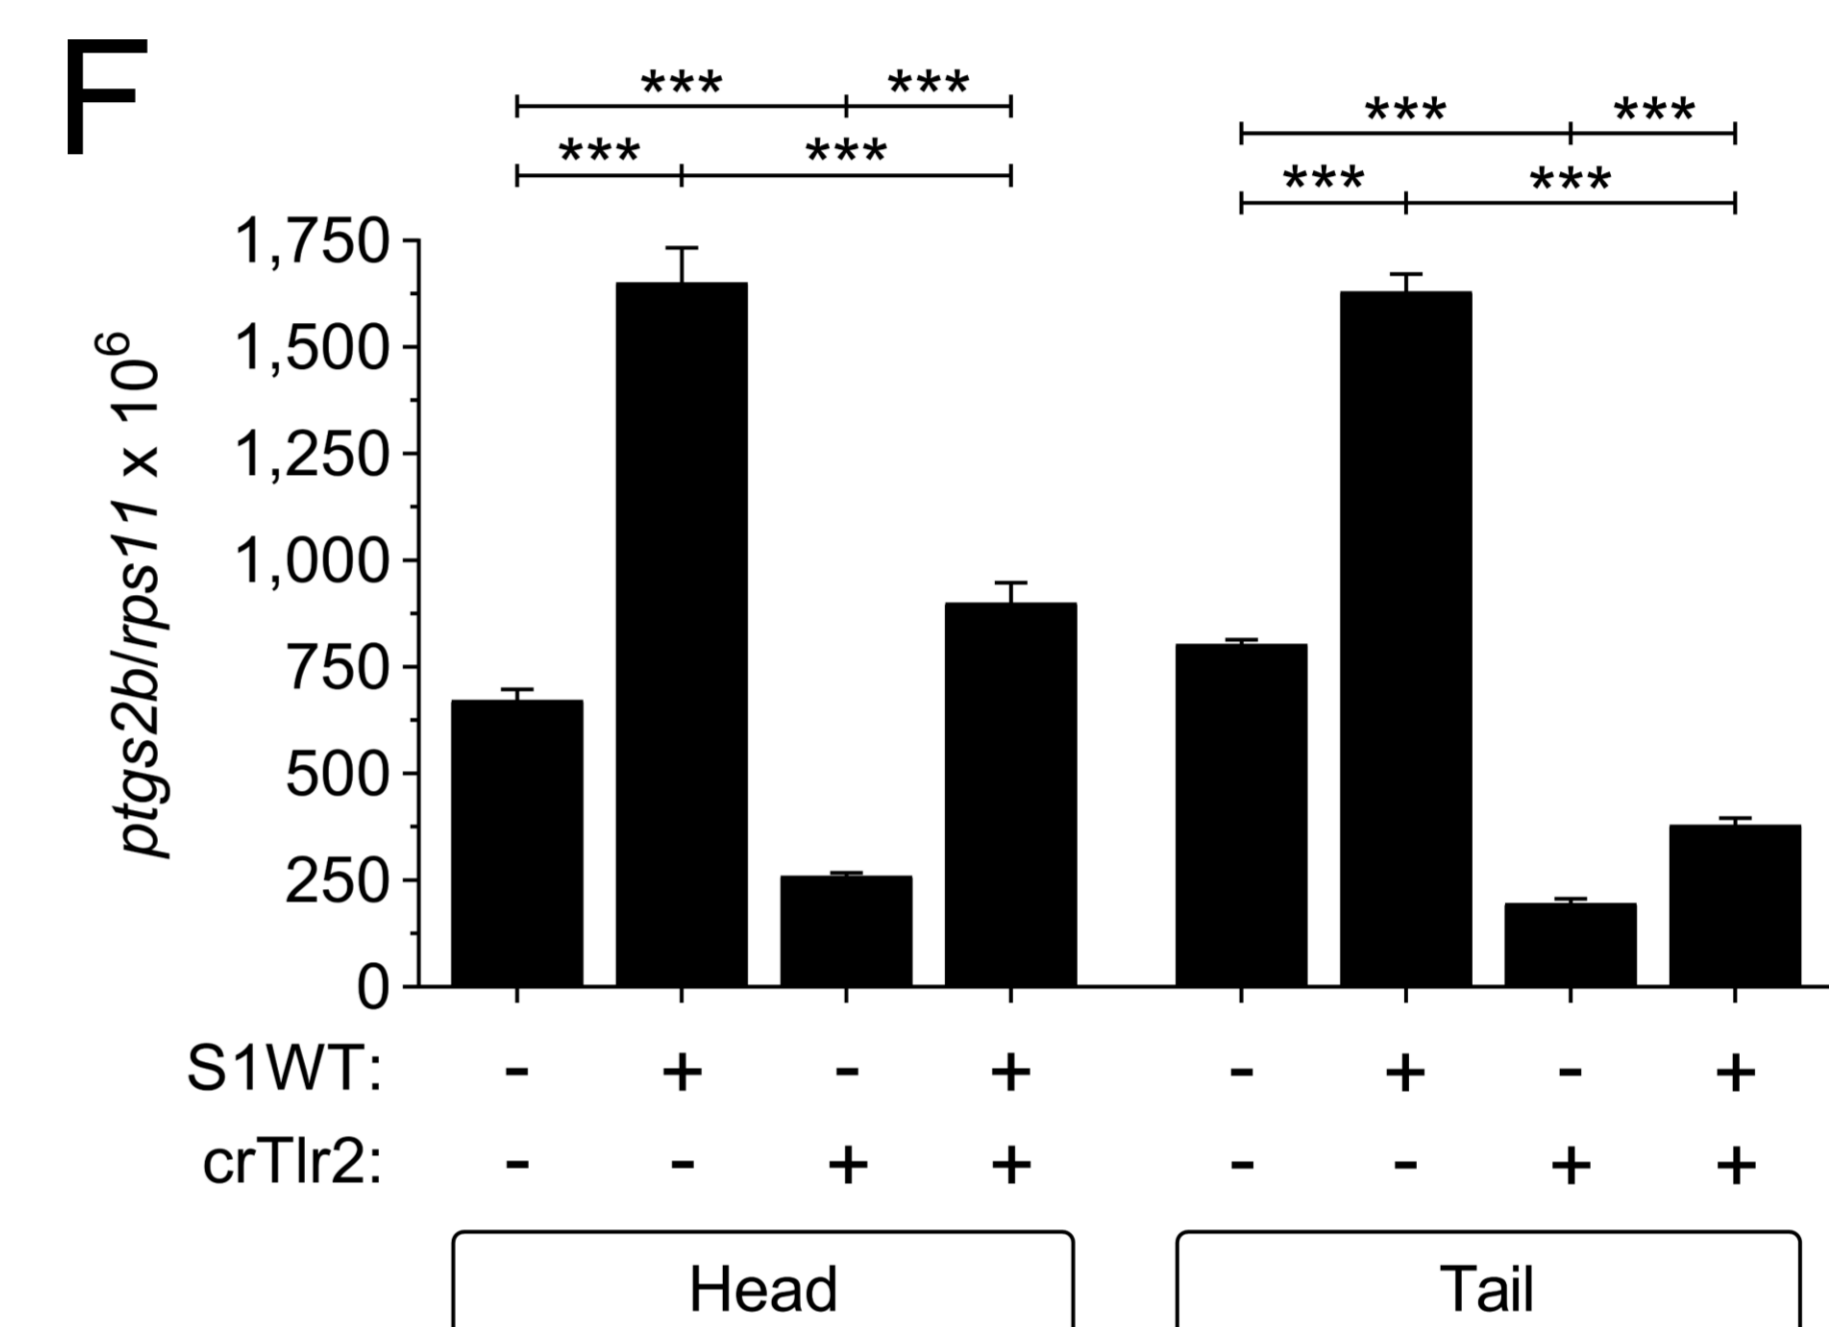

**G**

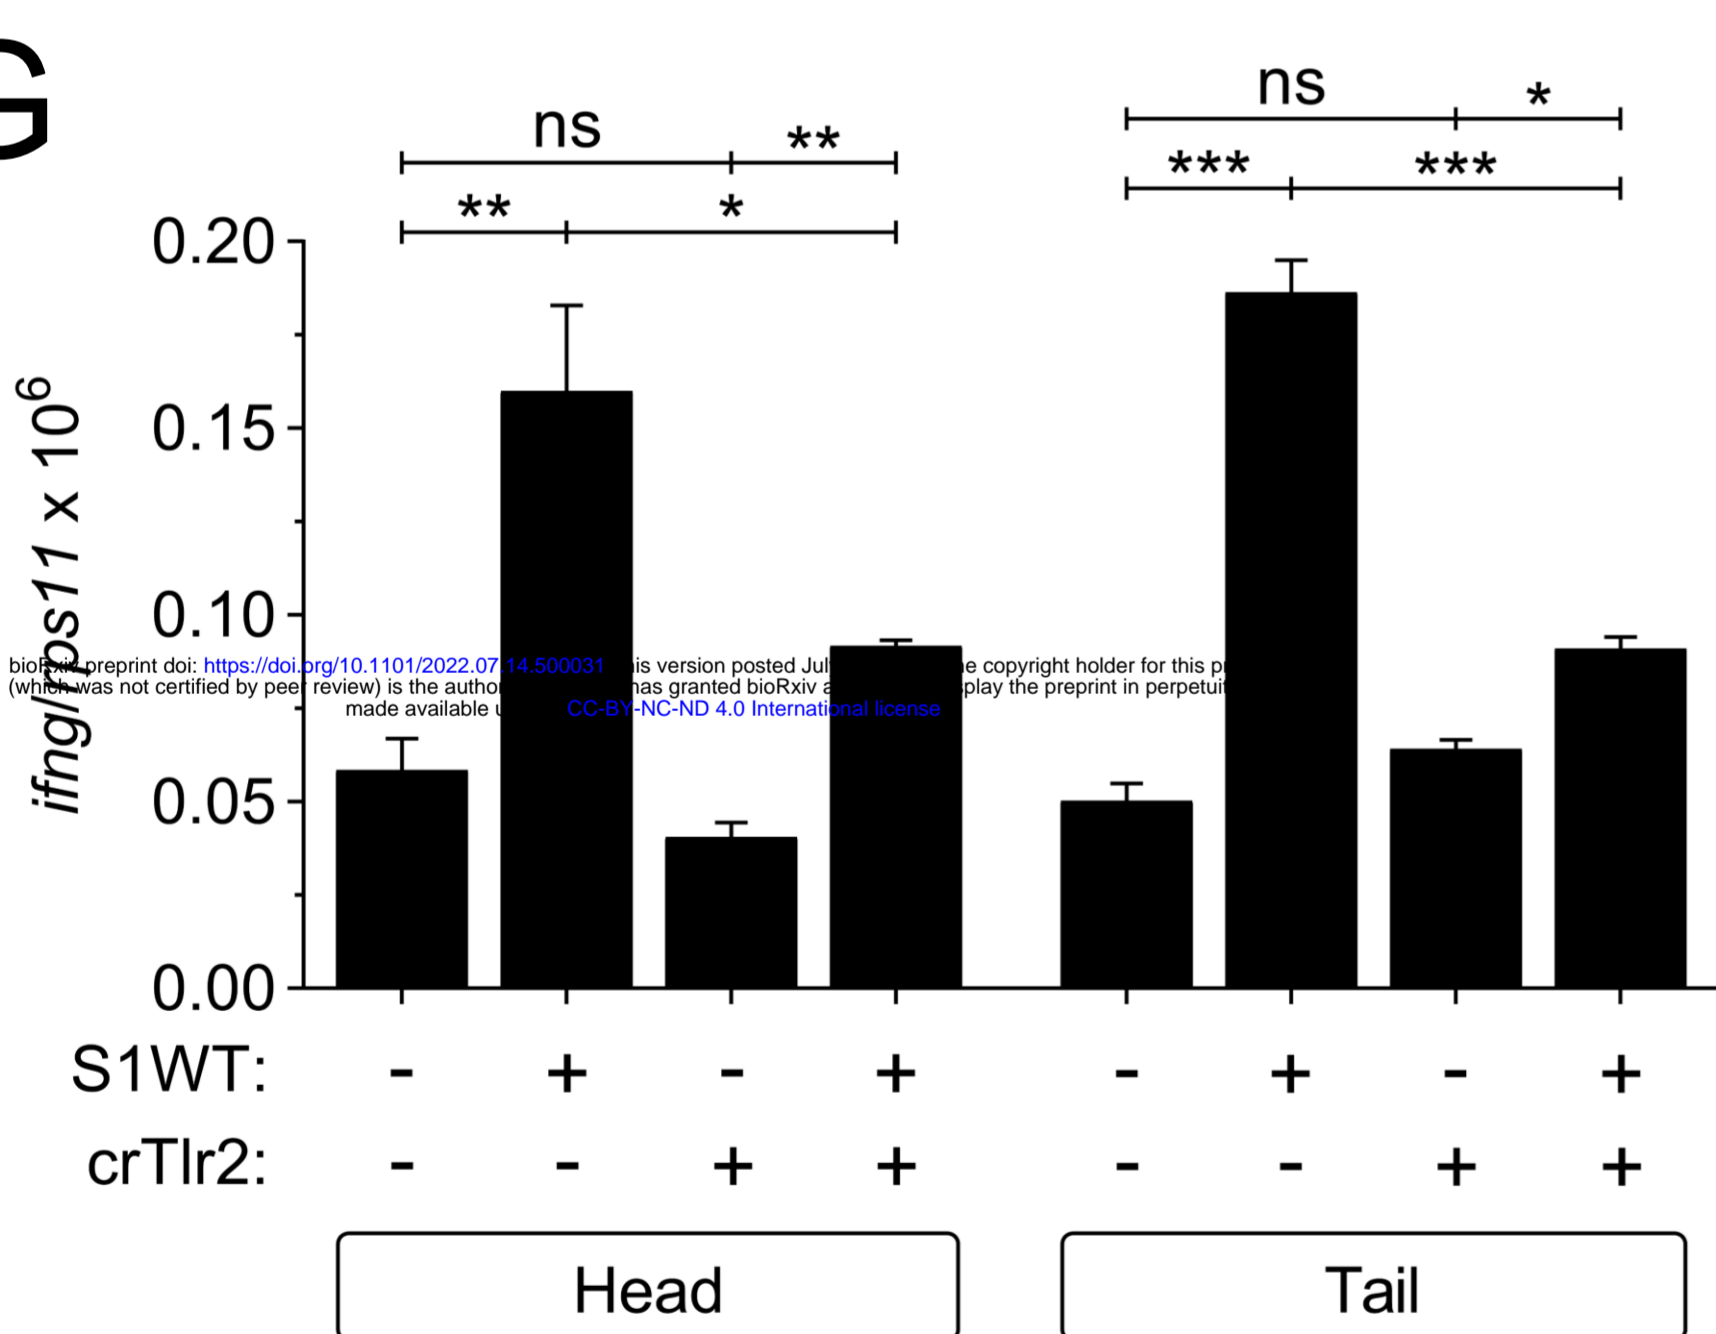

**H**

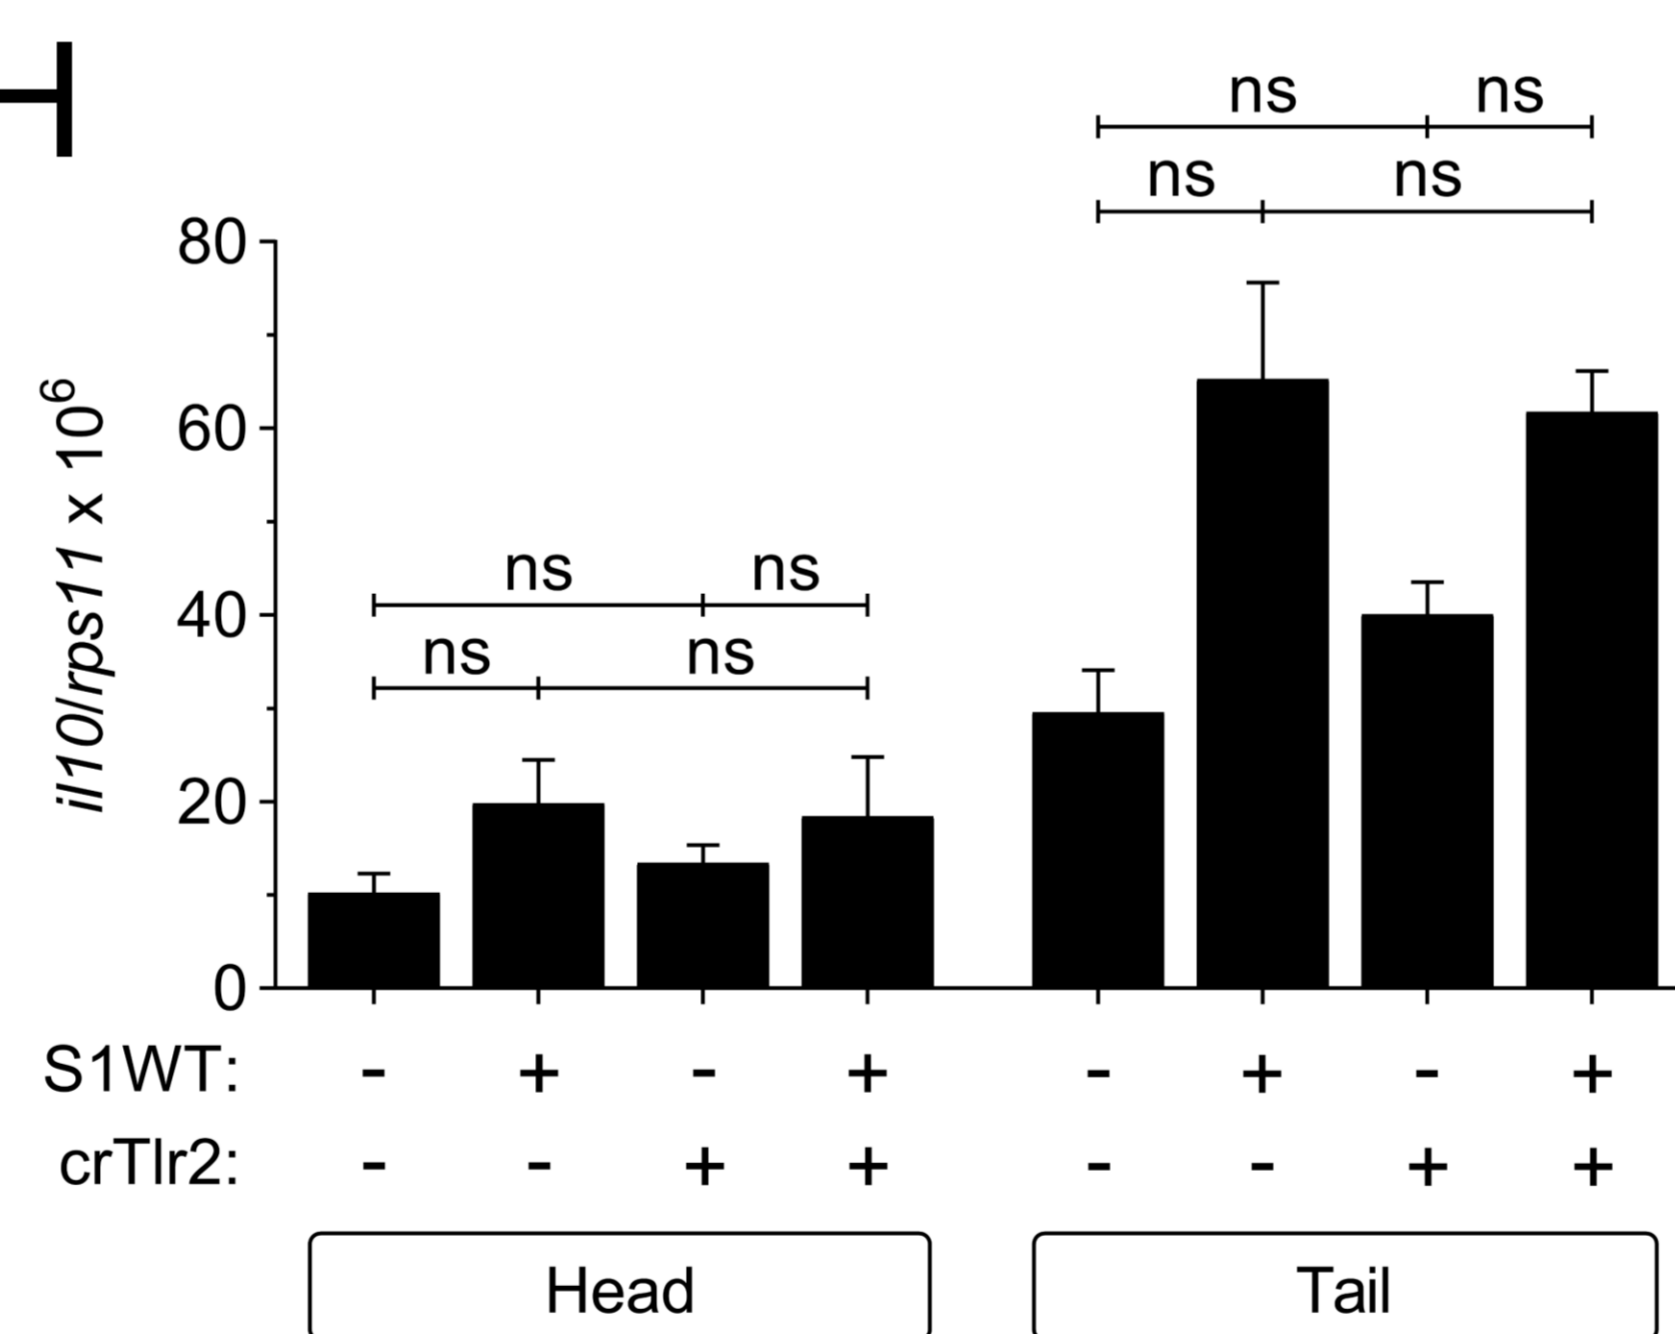

**I**

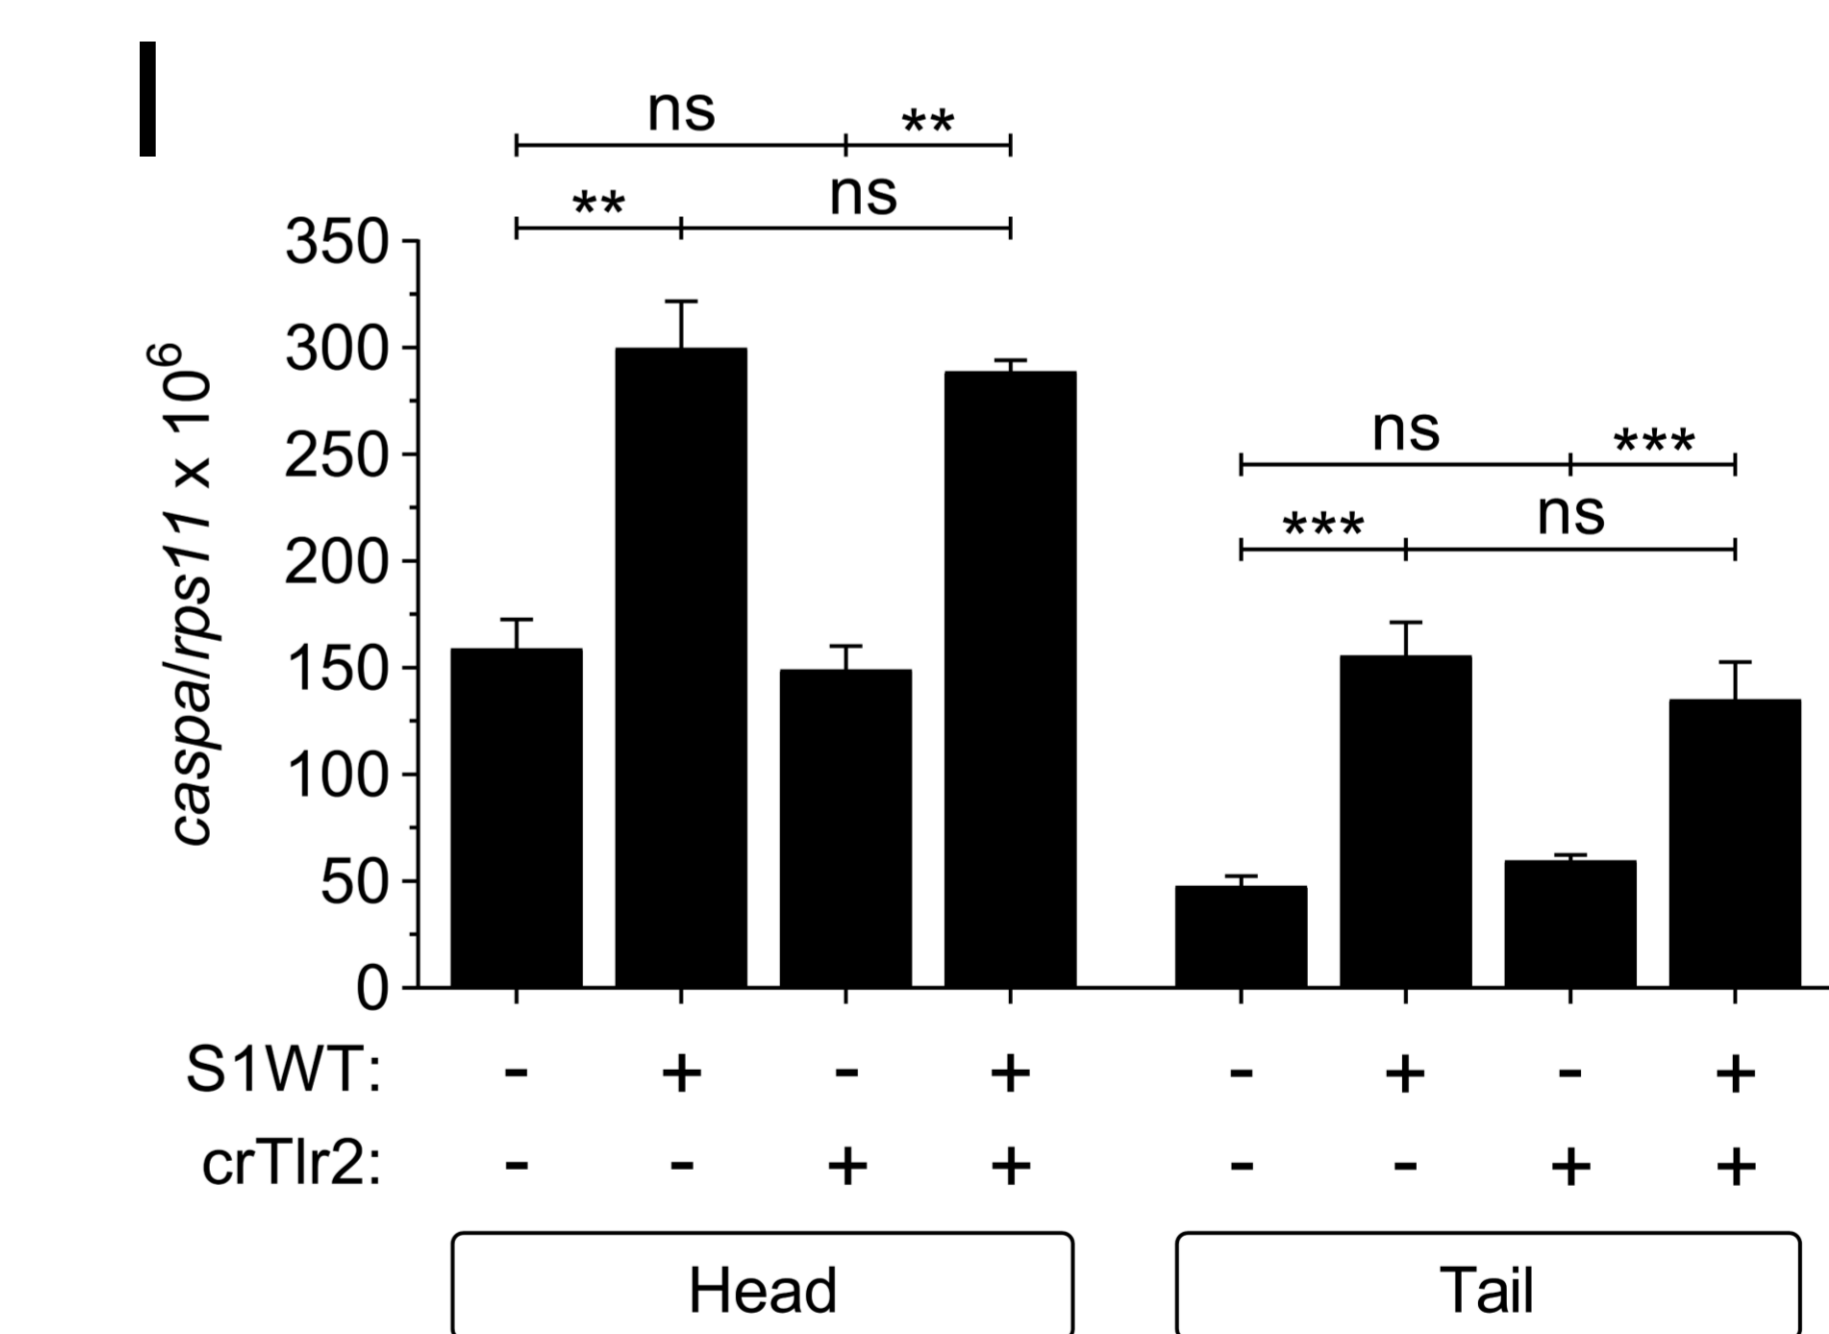

**J**

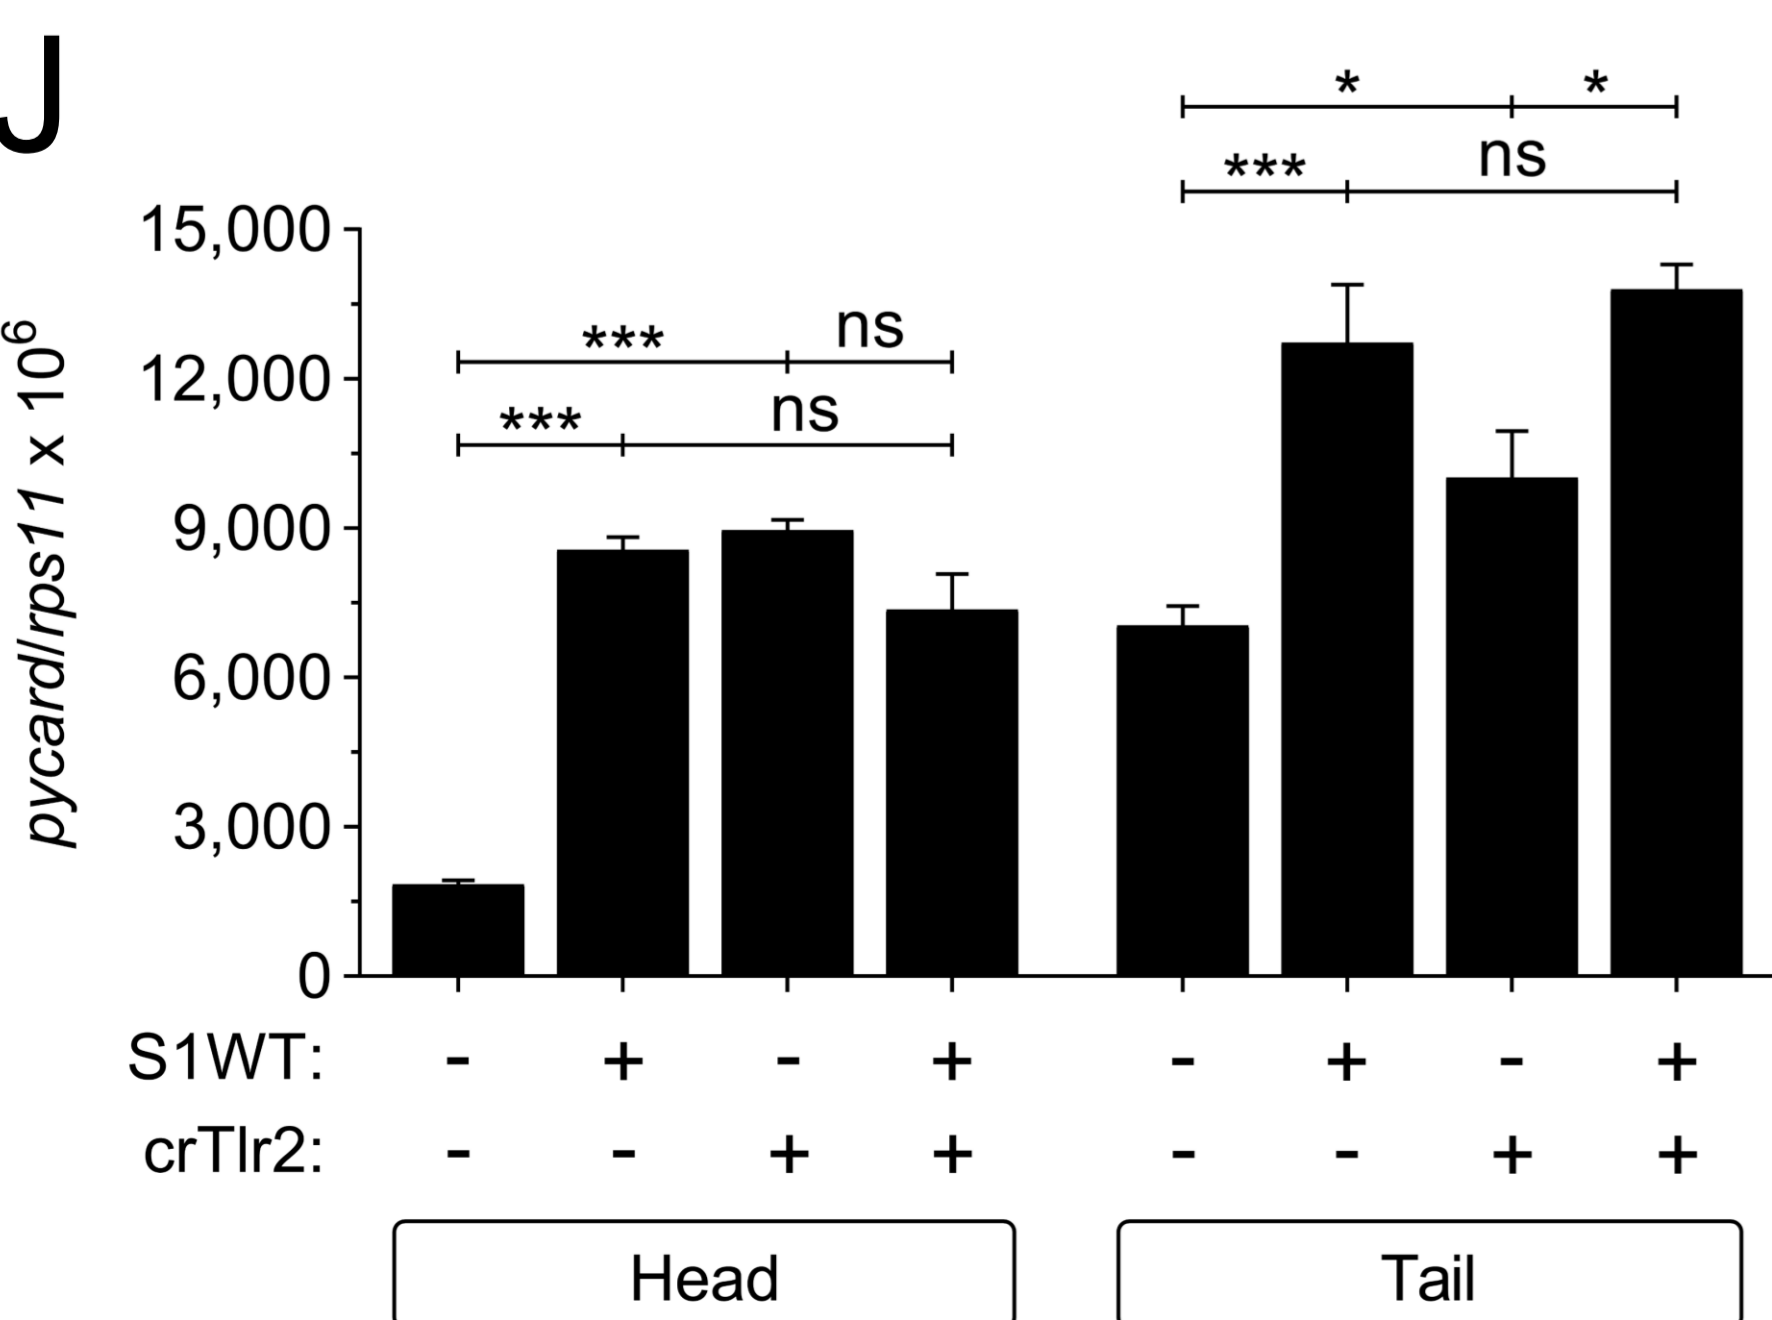

**Table S1.** Primers used in this study. The gene symbols followed the Zebrafish Nomenclature Guidelines ([http://zfin.org/zf\\_info/nomen.html](http://zfin.org/zf_info/nomen.html)). Ena, European Nucleotide Archive.

| Gene                 | ENA or ENSEMBL accession number | Name | Sequence (5'→3')           | Use                                     |
|----------------------|---------------------------------|------|----------------------------|-----------------------------------------|
| <i>rps11</i>         | NM_213377.1                     | F    | ACAGAAATGCCCCCTTCACTG      | RT-qPCR                                 |
|                      |                                 | R    | GCCTCTTCTCAAACGGTTG        |                                         |
| <i>il1b</i>          | NM_212844.2                     | F    | GCCTGTGTGTTTGGGAATCT       |                                         |
|                      |                                 | R    | TGATAAACCAACCGGGACA        |                                         |
| <i>nfkβ1</i>         | ENSDARG00000105261.2            | F    | TTCTTCTTGGTCACGTGCAG       |                                         |
|                      |                                 | R    | ACTCTCAGCATCCGCATCTT       |                                         |
| <i>tnfa</i>          | NM_212859.2                     | F    | GCGCTTTTCTGAATCCTACG       |                                         |
|                      |                                 | R    | TGCCAGTCTGTCTCCTTCT        |                                         |
| <i>cxcl8a</i>        | XM_001342570.7                  | F    | GTCGCTGCATTGAAACAGAA       |                                         |
|                      |                                 | R    | CTTAACCCATGGAGCAGAGG       |                                         |
| <i>il10</i>          | NM_001020785.2                  | F    | AACTCAAGCGGGATATGGTG       |                                         |
|                      |                                 | R    | ATCAAGCTCCCCATAGCTT        |                                         |
| <i>ifng (ifng1r)</i> | NM_001020793.1                  | F    | CTTCAGACAACCAGCGCATA       |                                         |
|                      |                                 | R    | TTTTCCAACCCAATCCTTTG       |                                         |
| <i>ptgs2a</i>        | NM_153657.1                     | F    | TGGATCTTTCCTGGTGAAGG       |                                         |
|                      |                                 | R    | GAAGCTCAGGGGTAGTGCAG       |                                         |
| <i>ptgs2b</i>        | NM_001025504.2                  | F    | CCCTCATGCCTGATGATTTT       |                                         |
|                      |                                 | R    | CCACCCTTAACACTGCTGGT       |                                         |
| <i>caspa</i>         | NM_131505.2                     | F    | CGACGTCAGGGAGATAAGGC       |                                         |
|                      |                                 | R    | TGGATACTAAGGTTTTGAACGACG   |                                         |
| <i>pycard</i>        | NM_131495.2                     | F    | ATTTTGAGGGCGATCAAGTG       |                                         |
|                      |                                 | R    | GCATCCTCAAGGTCATCCAT       |                                         |
| <i>tlr2</i>          | NM_212812.1                     | F    | CCGCGGCCTCAGTCTGGAAA       |                                         |
|                      |                                 | R    | TGAAGCAACGACCCTGTGCAG      |                                         |
| <i>tlr3</i>          | NM_001013269.3                  | F    | TTACCATCATAACTCGGTGA       |                                         |
|                      |                                 | R    | ACAGCTTCTGCTTAAAAGTG       |                                         |
| <i>tlr4ba</i>        | AY389447.1                      | F    | ACAAAGCTAGTGAAGTGA         |                                         |
|                      |                                 | R    | CCGTGTTGTAAATAGTGCTC       |                                         |
| <i>tlr4bb</i>        | NM_212813.2                     | F    | AGAGGCATATGCAATCTGGAGC     |                                         |
|                      |                                 | R    | ATACATCTGGCTCTTTAAACTCACA  |                                         |
| <i>tlr7</i>          | XM_021479060.1                  | F    | GAGAGGAATGATGTTATCGTA      |                                         |
|                      |                                 | R    | GGAAGAGATGGCTGGAGATGG      |                                         |
| <i>il1b</i>          | ENSDARG00000098700              | F    | TCATGATGACTTTTGTGGAGAGAAAA | Target sequence amplification from gDNA |
|                      |                                 | R    | GTAACCTGTACCTGGCCTGC       |                                         |
| <i>tlr2</i>          | ENSDARG00000037758              | F    | GGGACCTGCTCCAATCTTCAA      | Target sequence amplification from gDNA |
|                      |                                 | R    | ACATGGACCTCAGCCAGAATC      |                                         |

**Table S2.** crRNA used in this study. The gene symbols followed the Zebrafish Nomenclature Guidelines ([http://zfin.org/zf\\_info/nomen.html](http://zfin.org/zf_info/nomen.html)).

| <b>Gene</b> | <b>Name</b>       | <b>Sequence (5'→3')</b> |
|-------------|-------------------|-------------------------|
| <i>il1b</i> | Dr.Cas9.IL1B.1.AA | CAGGCCGTCACACTGAGAGC    |
| <i>tlr2</i> | Dr.Cas9.TLR2.1.AA | CGACCGATCAAGCCTTGACC    |
